# Supplementary material for: Synthesis of 1-aryl-2,3-diaroyl cyclopropanes from 1,3,5-triaryl-1,5-diketones and their transformation into E,E-1,4-diaryl-1,3-butadienes
Source: Royal Society of Chemistry journal article supplement (doi:10.1039/d4ra02525c), 2024-01-01
Supplement: d4ra02525c2.pdf [file d4ra02525c2.pdf]

## **Electronic Supplementary Information**

### **Synthesis of 1-aryl-2,3-diaroyl cyclopropanes from 1,3,5-triaryl-1,5-diketones and their transformation into *E,E*-1,4-diaryl-1,3-butadienes**

Kashpar John Britto,<sup>a</sup> Maniarasu Meenakshi<sup>a</sup> and Kannupal Srinivasan<sup>a\*</sup>

School of Chemistry, Bharathidasan University, Tiruchirappalli-620024, Tamil Nadu, India

[srinivasank@bdu.ac.in](mailto:srinivasank@bdu.ac.in)

#### **Table of Contents**

|                                                                                   |        |
|-----------------------------------------------------------------------------------|--------|
| A. Copies of <sup>1</sup> H and <sup>13</sup> C NMR spectra for all products..... | S2-S97 |
| B. ORTEP plot of the crystal structure of <b>8h</b> .....                         | S98    |

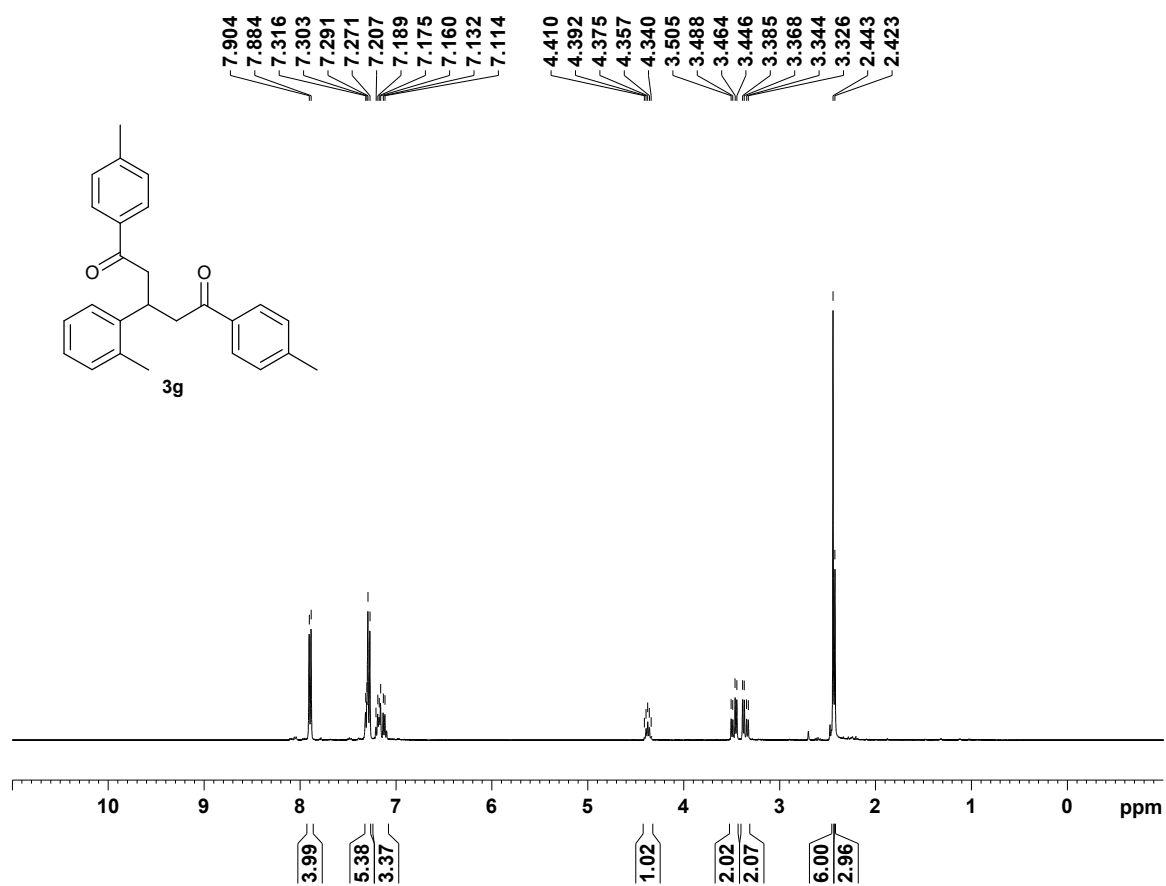

Figure S1.  $^1\text{H}$  NMR (400 MHz,  $\text{CDCl}_3$ ) spectrum of **3g**

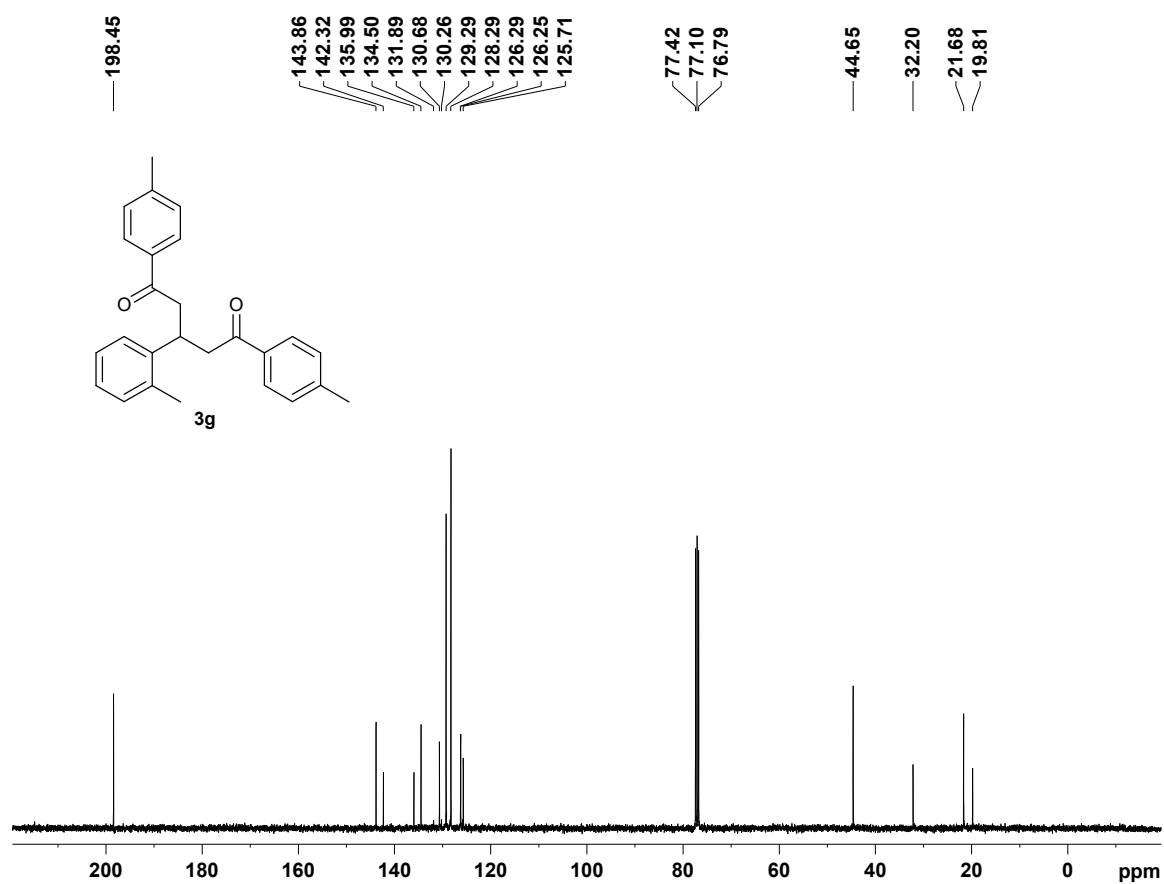

**Figure S2.**  $^{13}\text{C}\{^1\text{H}\}$  NMR (100 MHz,  $\text{CDCl}_3$ ) spectrum of **3g**

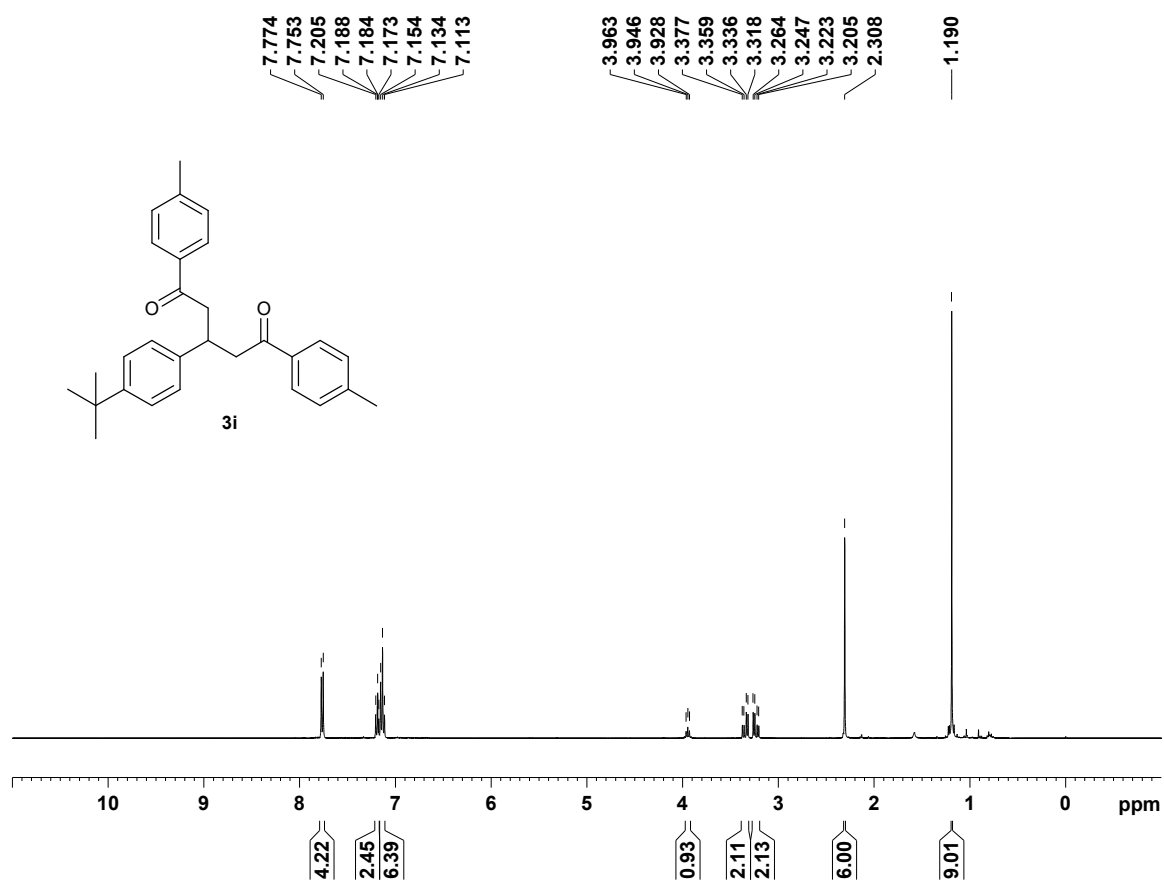

**Figure S3.** <sup>1</sup>H NMR (400 MHz, CDCl<sub>3</sub>) spectrum of **3i**

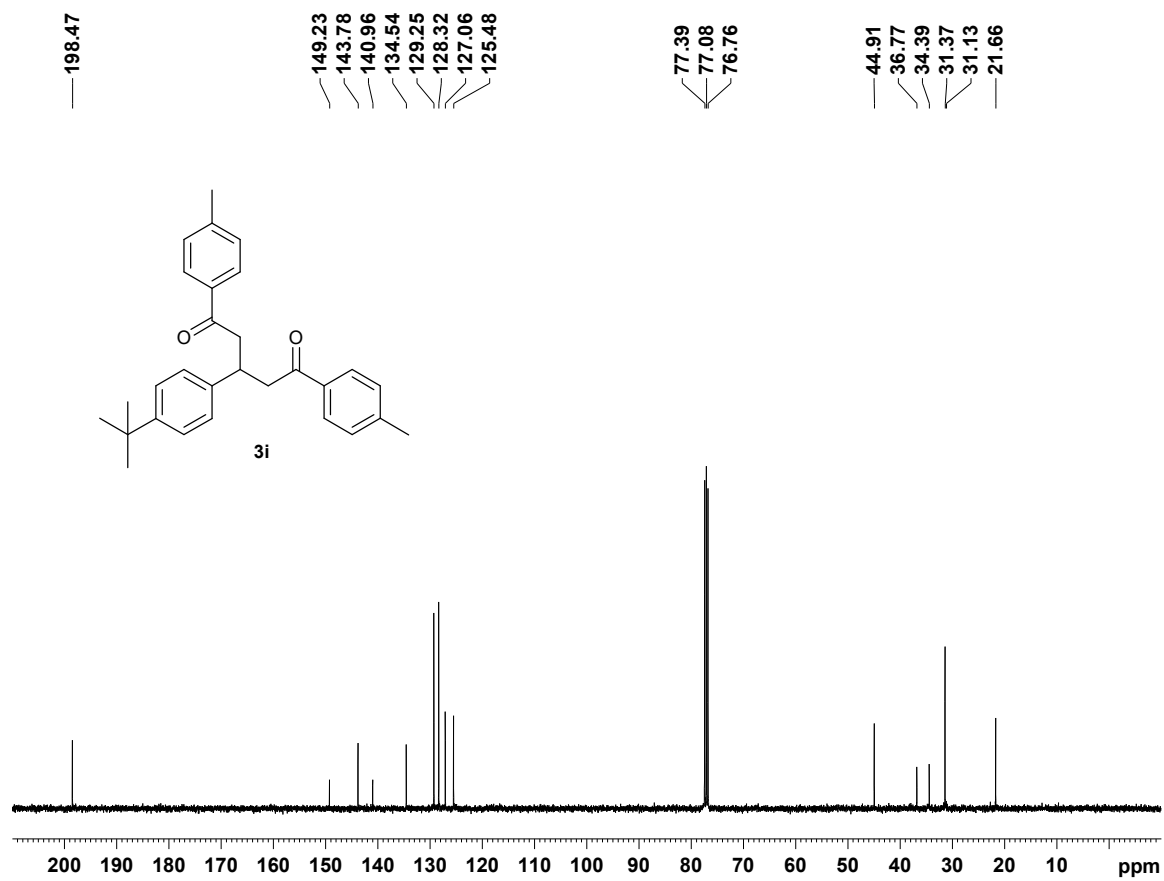

**Figure S4.**  $^{13}\text{C}\{^1\text{H}\}$  NMR (100 MHz,  $\text{CDCl}_3$ ) spectrum of **3i**

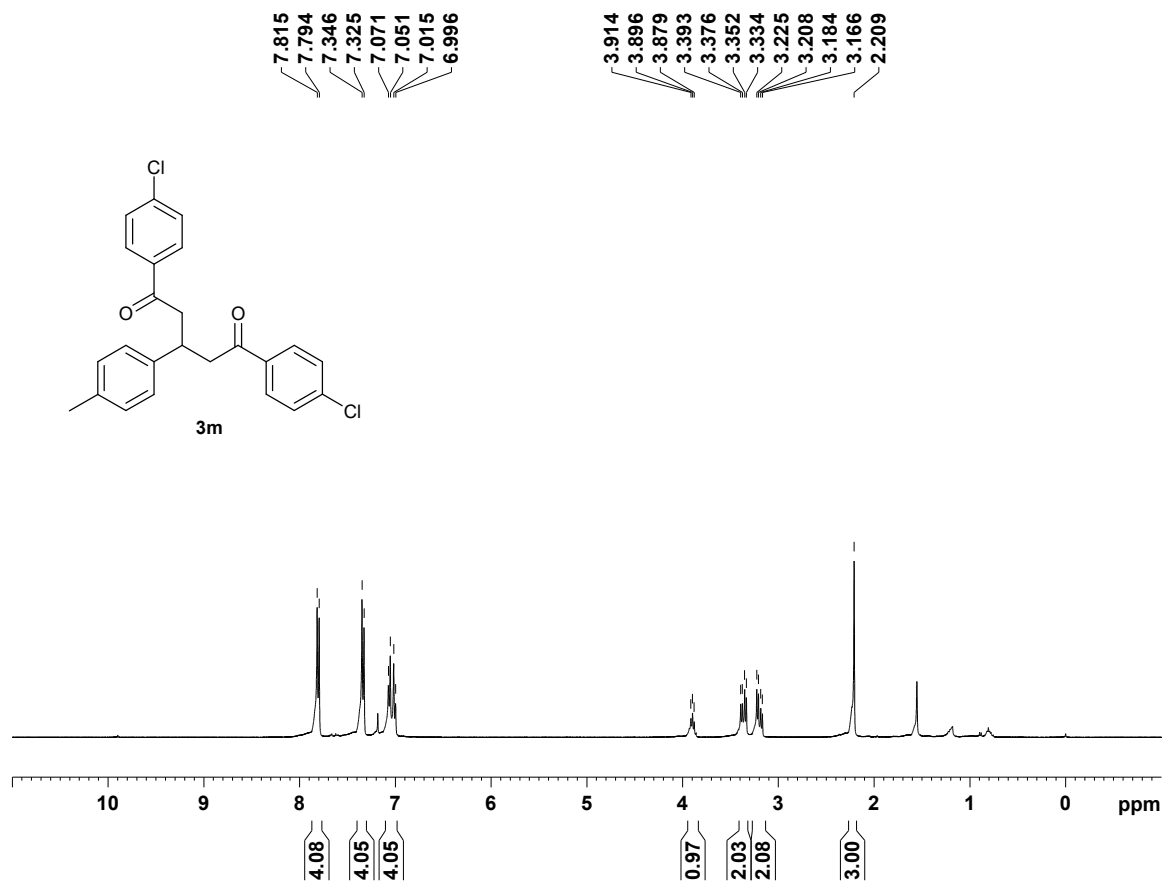

**Figure S5.**  $^1\text{H}$  NMR (400 MHz,  $\text{CDCl}_3$ ) spectrum of **3m**

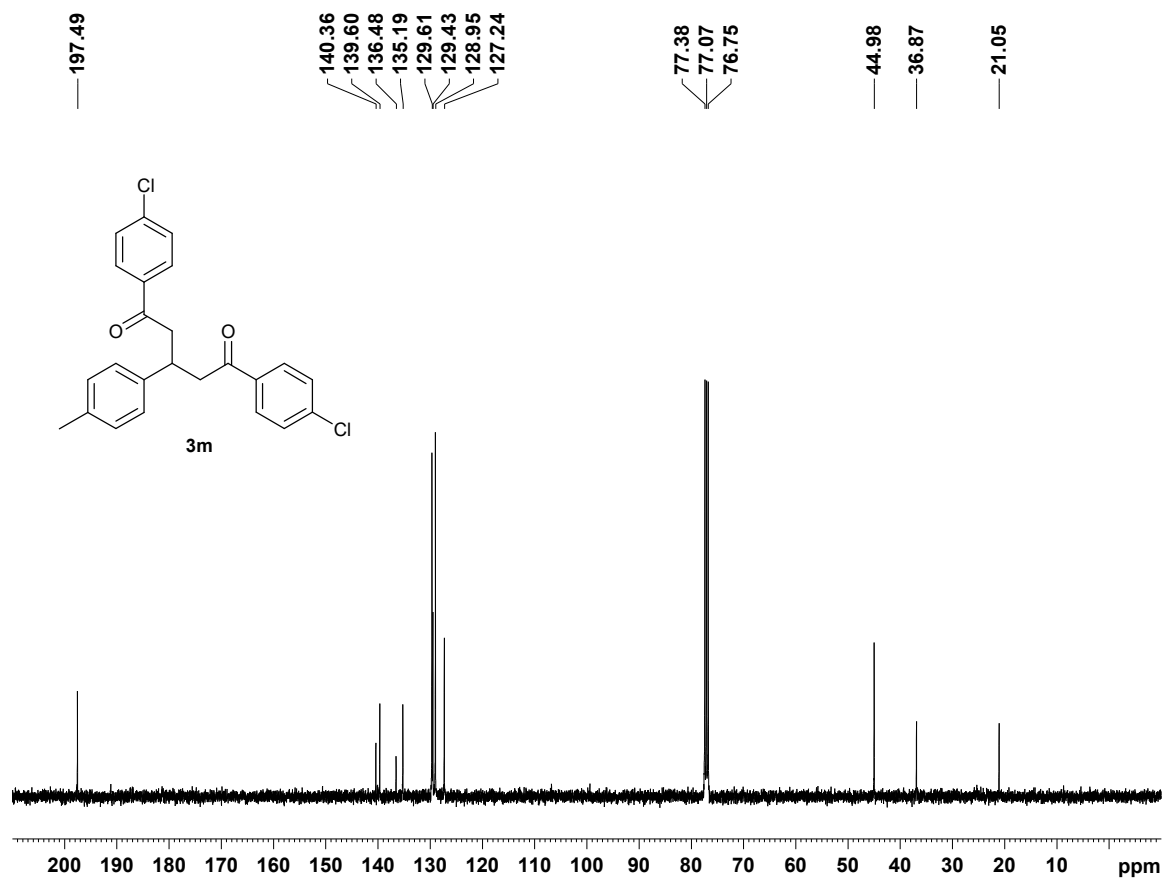

**Figure S6.**  $^{13}\text{C}\{^1\text{H}\}$  NMR (100 MHz,  $\text{CDCl}_3$ ) spectrum of **3m**

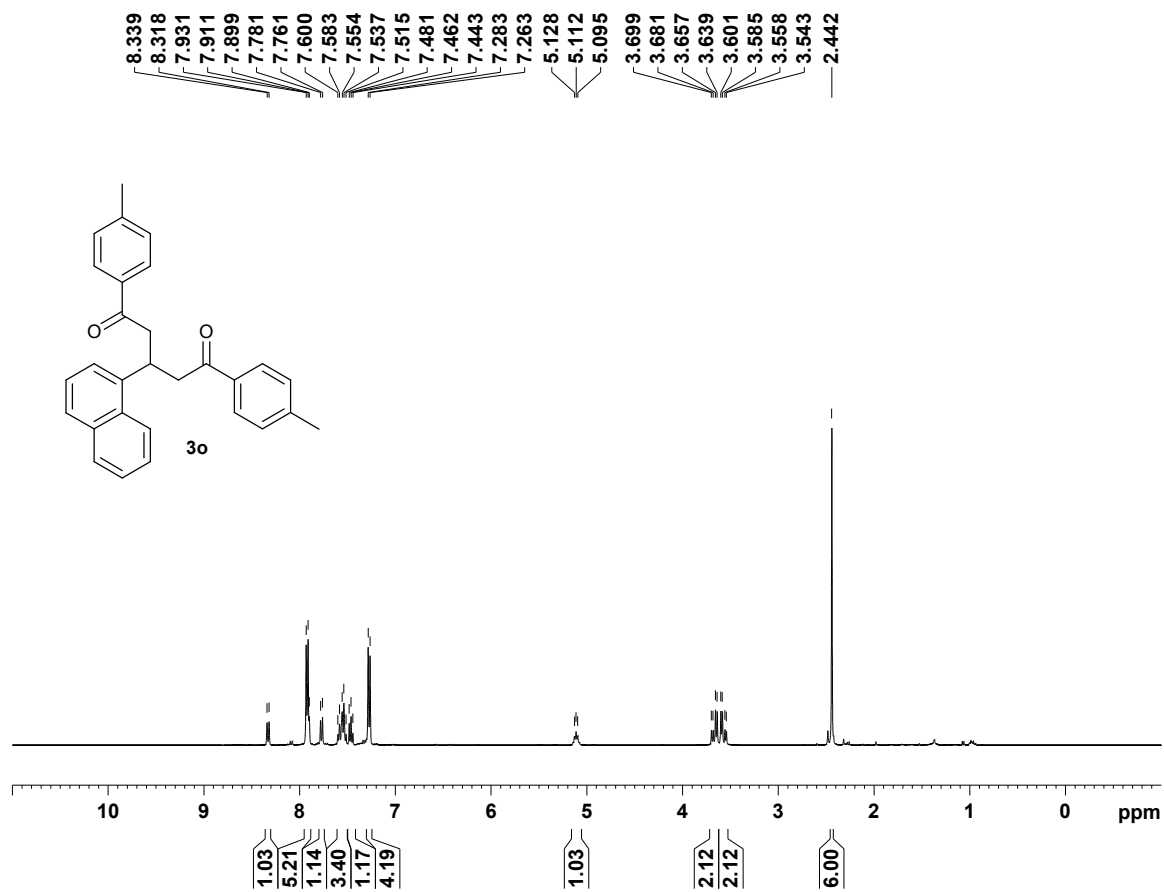

Figure S7. <sup>1</sup>H NMR (400 MHz, CDCl<sub>3</sub>) spectrum of **3o**



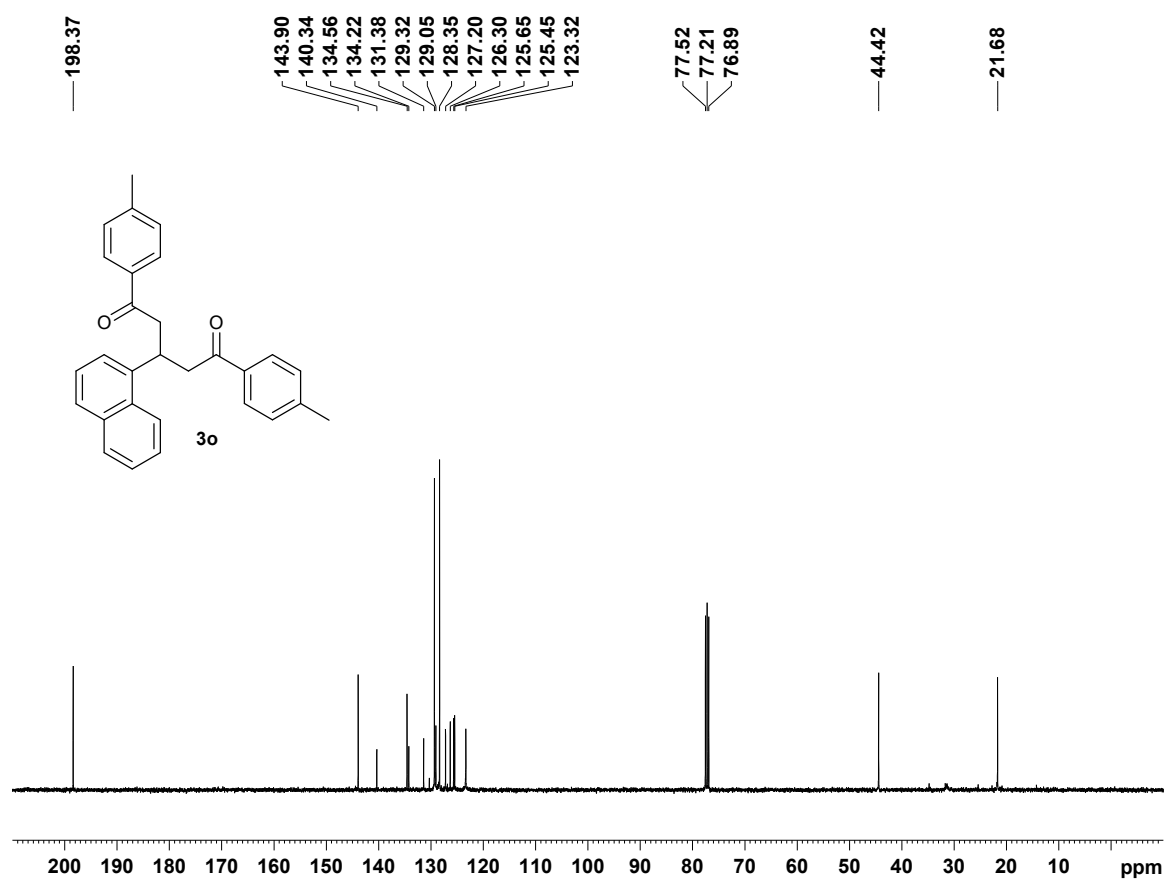

**Figure S8.**  $^{13}\text{C}\{^1\text{H}\}$  NMR (100 MHz,  $\text{CDCl}_3$ ) spectrum of **3o**

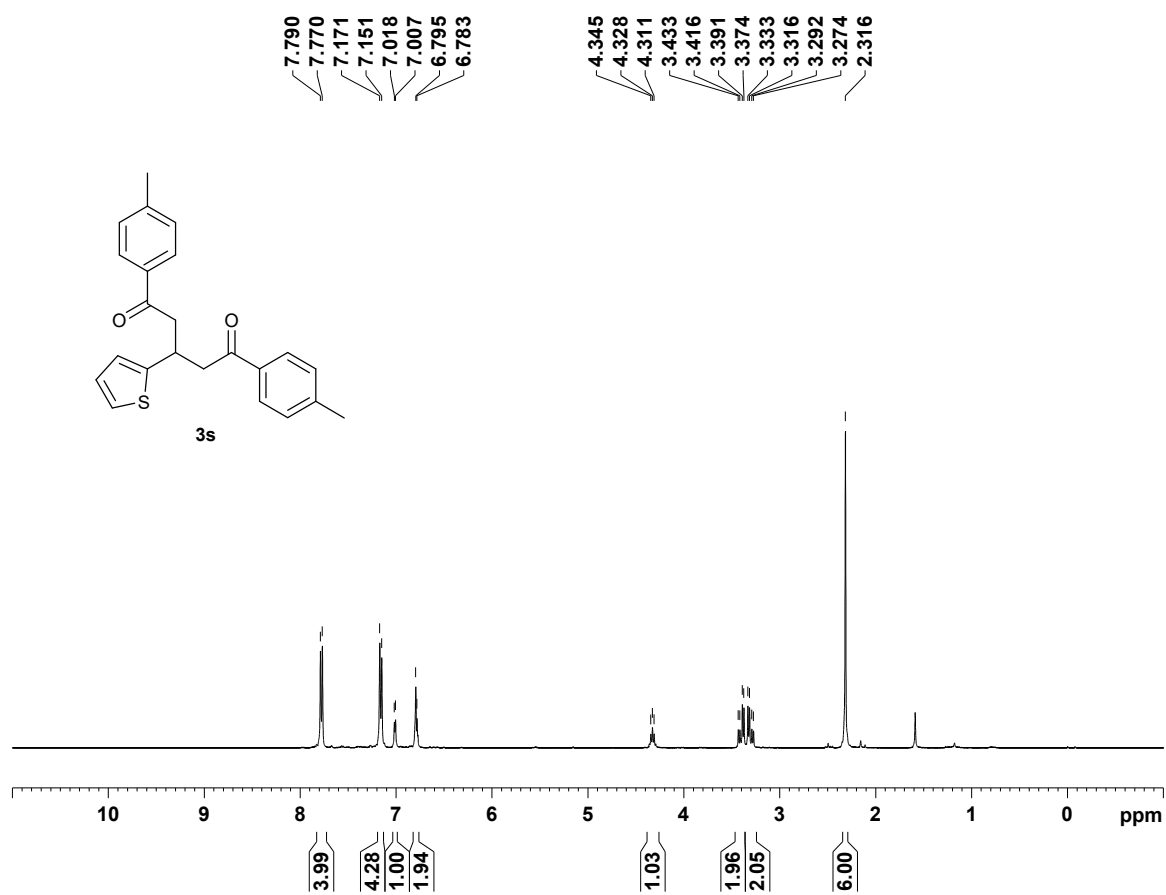

Figure S9. <sup>1</sup>H NMR (400 MHz, CDCl<sub>3</sub>) spectrum of **3s**

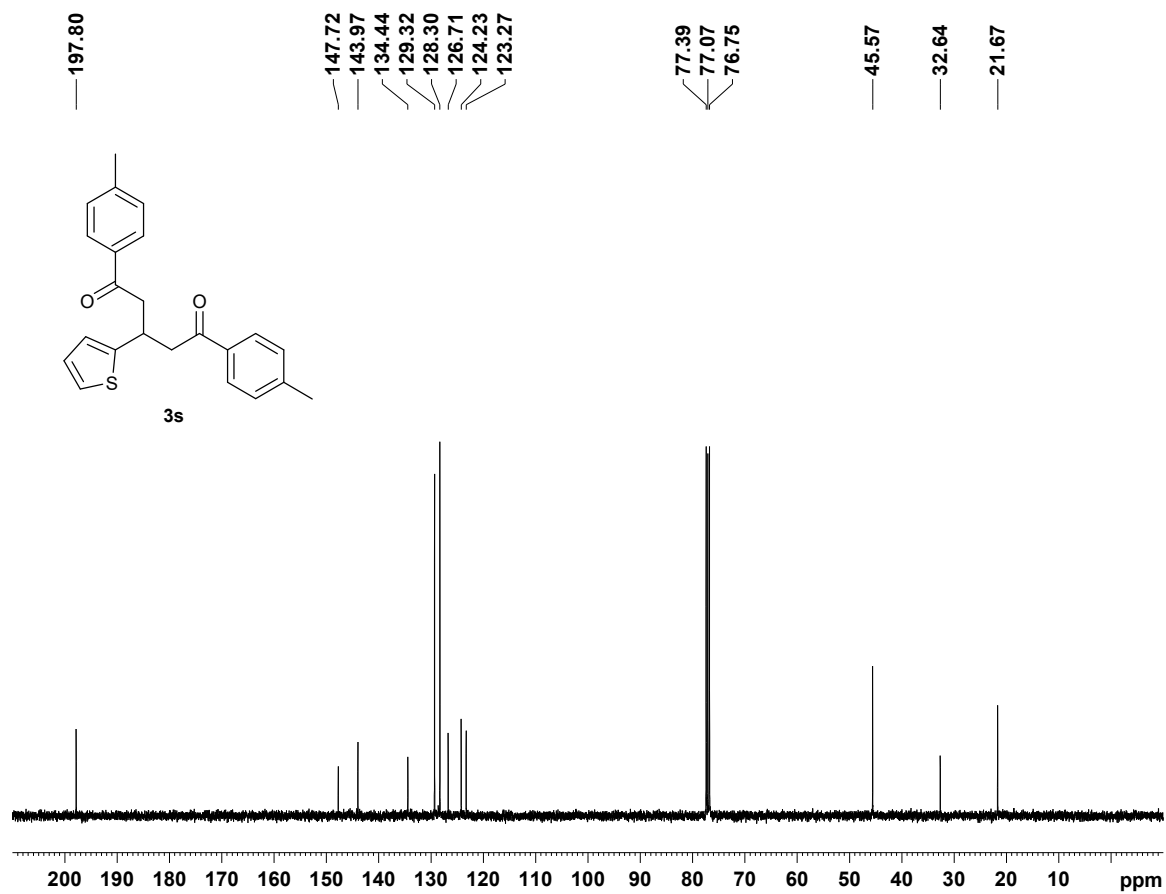

**Figure S10.**  $^{13}\text{C}\{^1\text{H}\}$  NMR (100 MHz,  $\text{CDCl}_3$ ) spectrum of **3s**

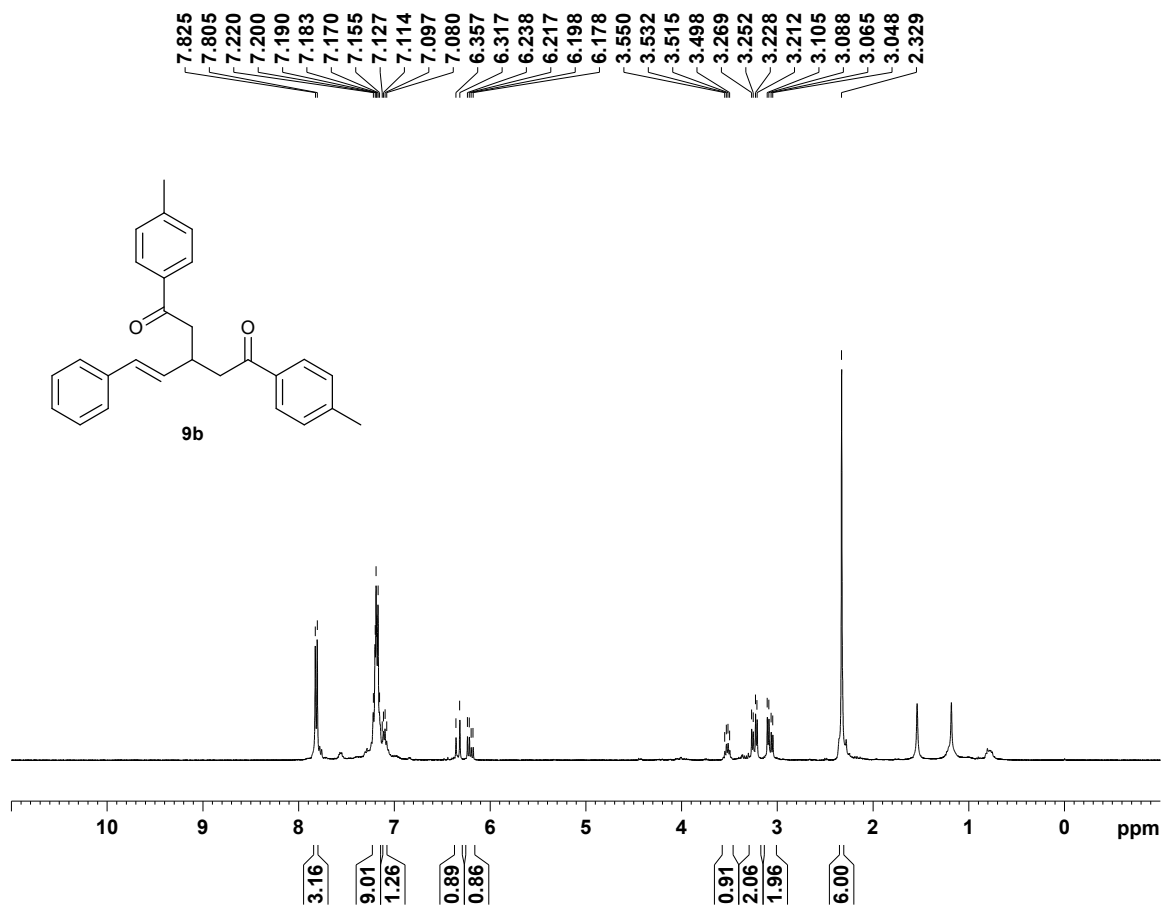

Figure S11. <sup>1</sup>H NMR (400 MHz, CDCl<sub>3</sub>) spectrum of **9b**

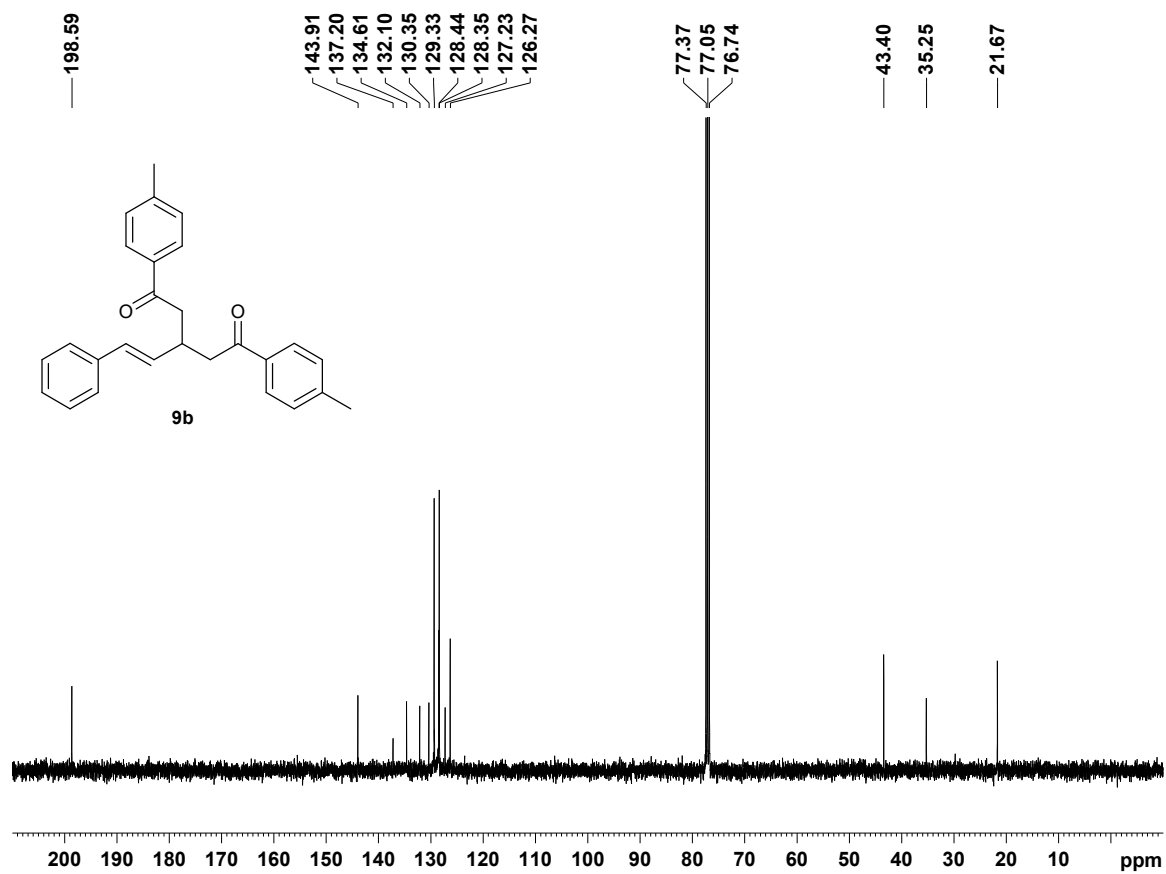

**Figure S12.**  $^{13}\text{C}\{^1\text{H}\}$  NMR (100 MHz,  $\text{CDCl}_3$ ) spectrum of **9b**

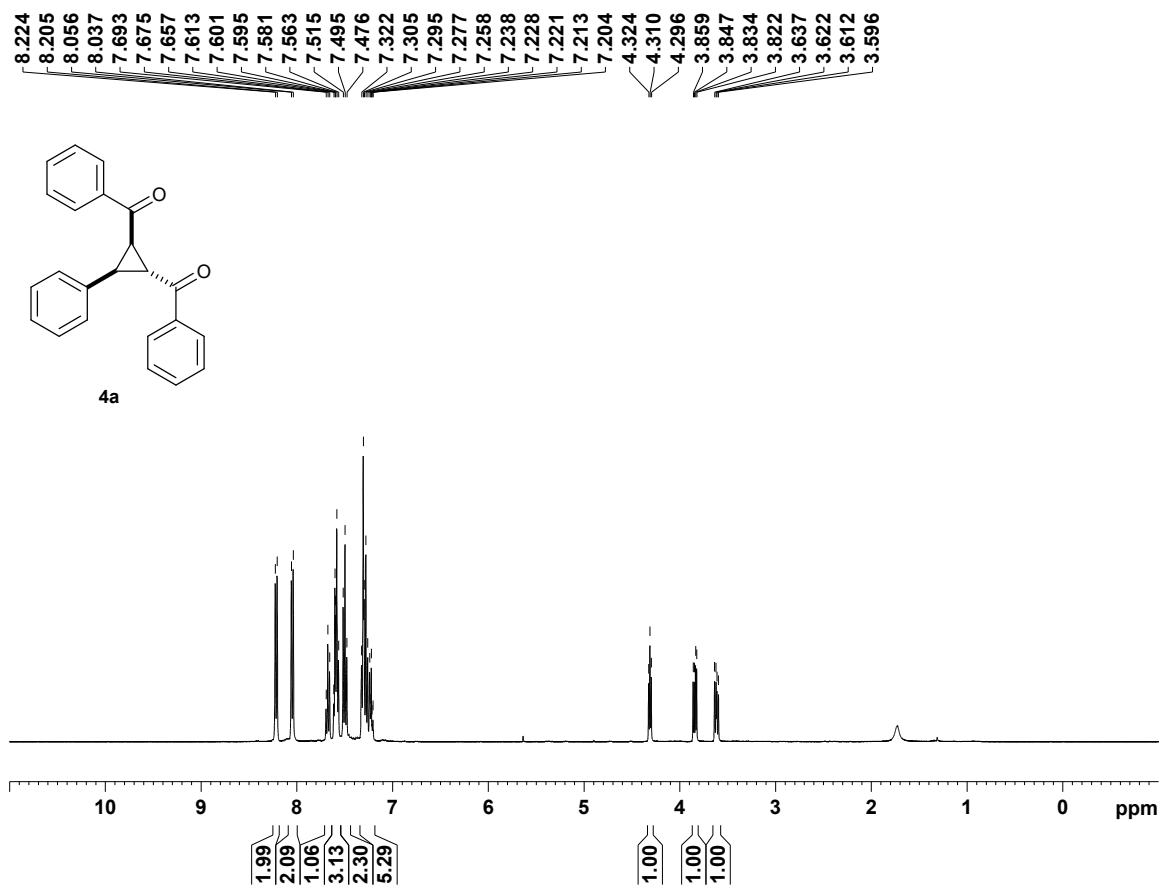

Figure S13. <sup>1</sup>H NMR (400 MHz, CDCl<sub>3</sub>) spectrum of **4a**

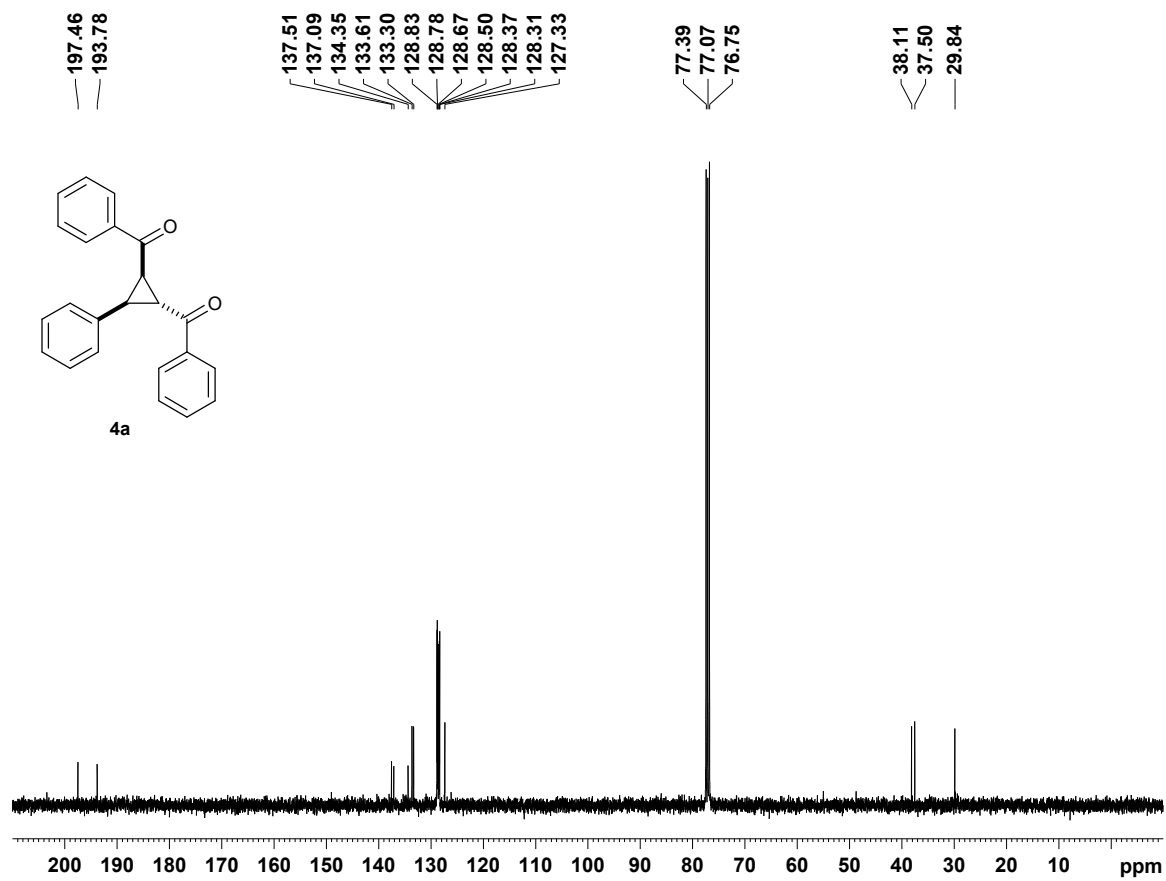

Figure S14.  $^{13}\text{C}\{^1\text{H}\}$  NMR (100 MHz,  $\text{CDCl}_3$ ) spectrum of 4a

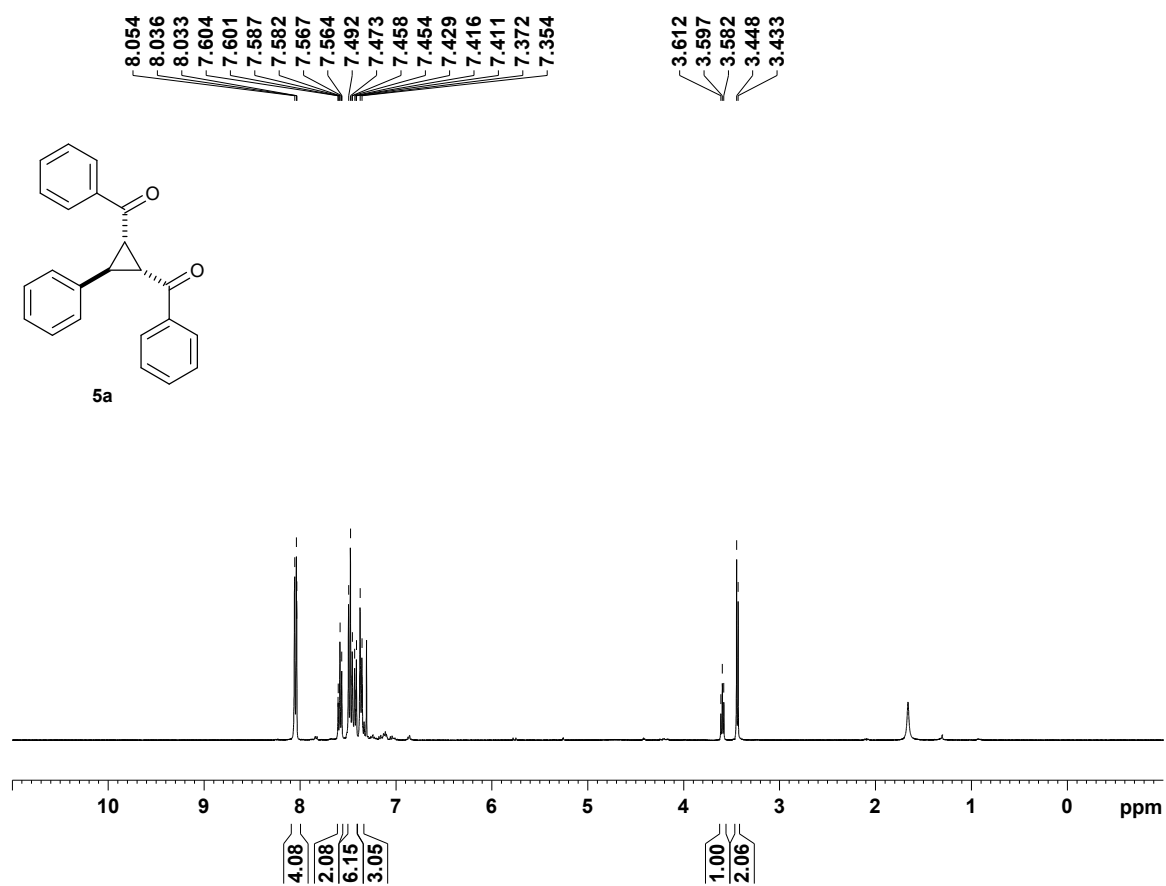

Figure S15. <sup>1</sup>H NMR (400 MHz, CDCl<sub>3</sub>) spectrum of **5a**



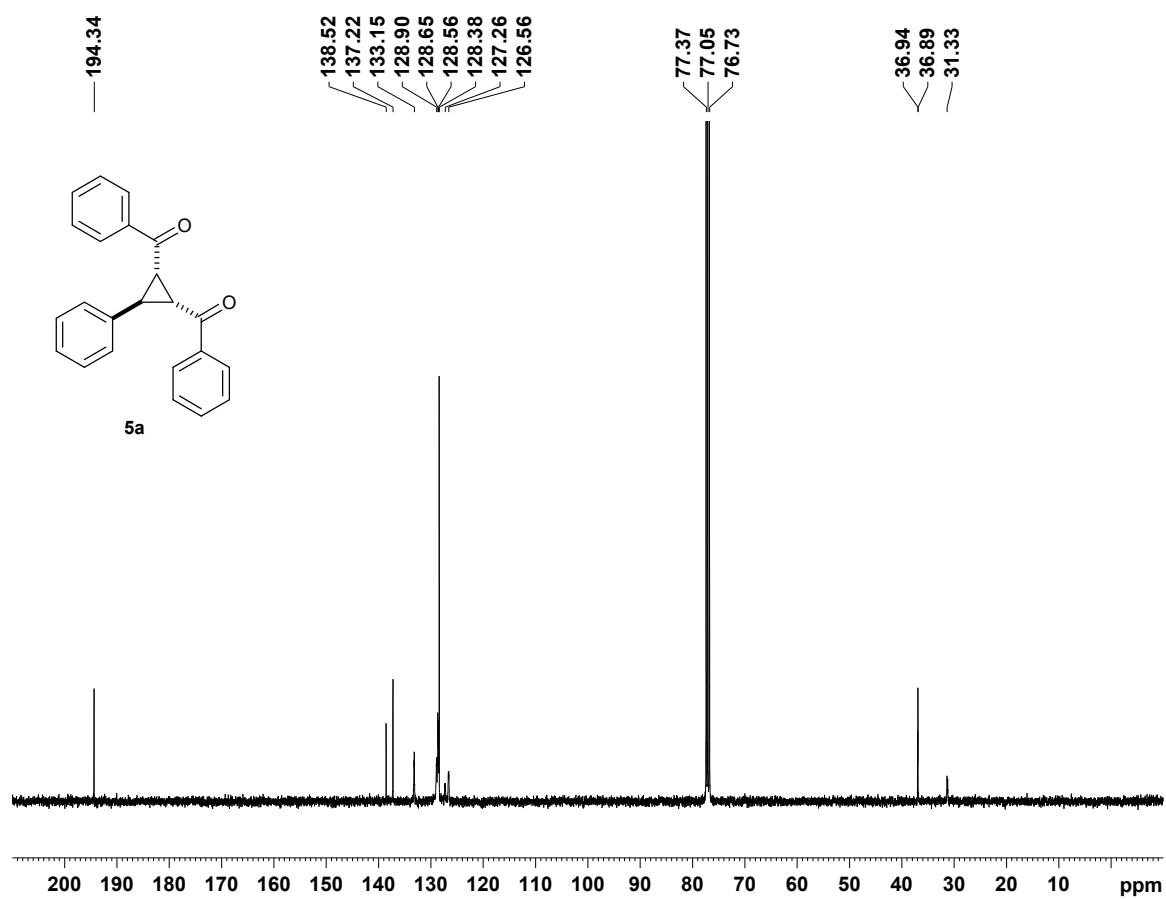

**Figure S16.**  $^{13}\text{C}\{^1\text{H}\}$  NMR (100 MHz,  $\text{CDCl}_3$ ) spectrum of **5a**

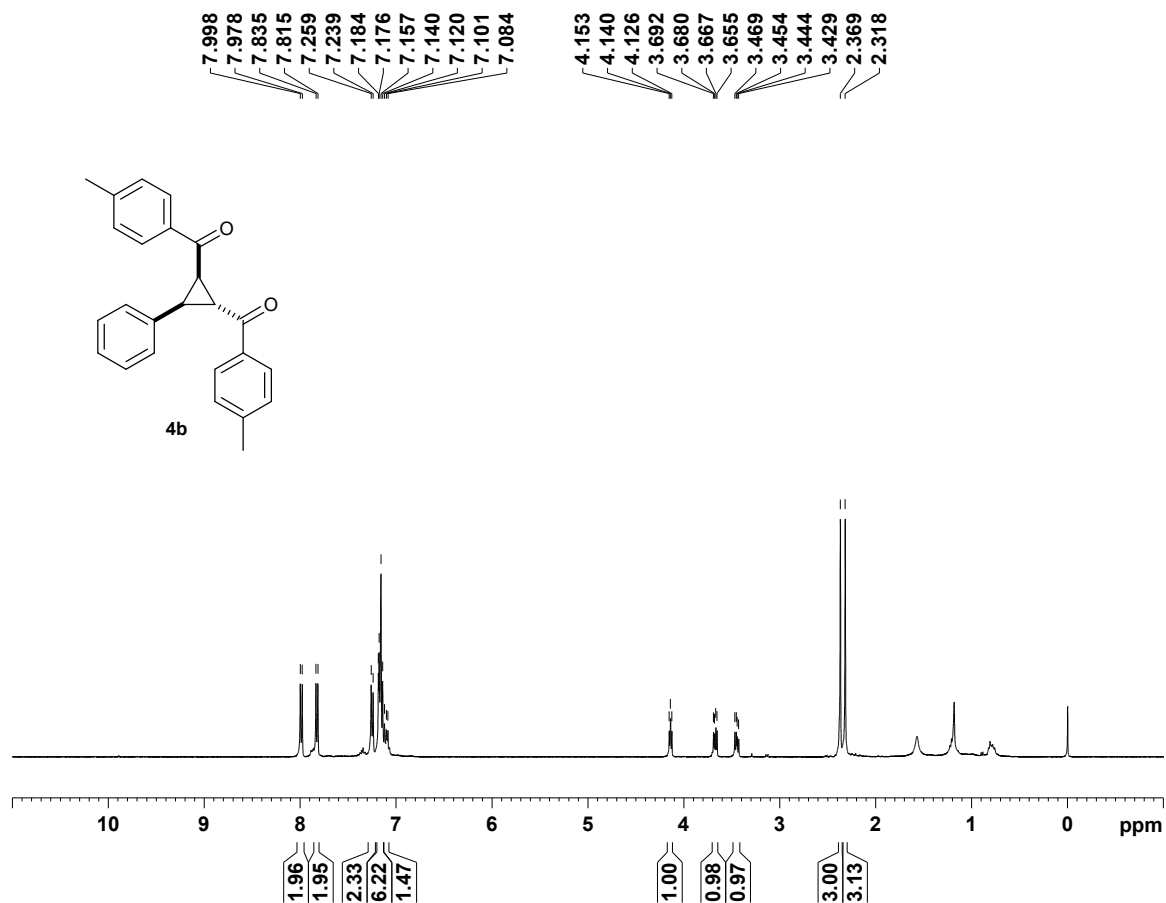

Figure S17. <sup>1</sup>H NMR (400 MHz, CDCl<sub>3</sub>) spectrum of **4b**

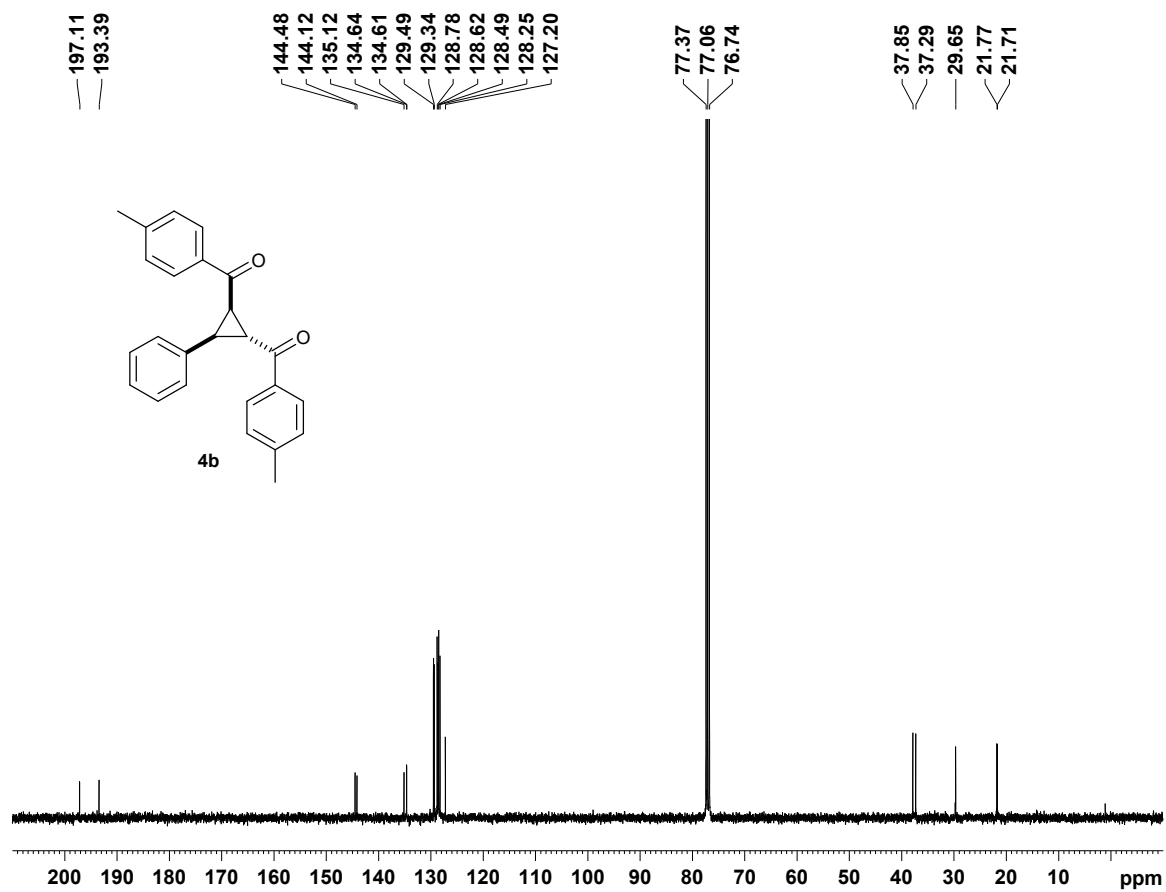

**Figure S18.**  $^{13}\text{C}\{^1\text{H}\}$  NMR (100 MHz,  $\text{CDCl}_3$ ) spectrum of **4b**

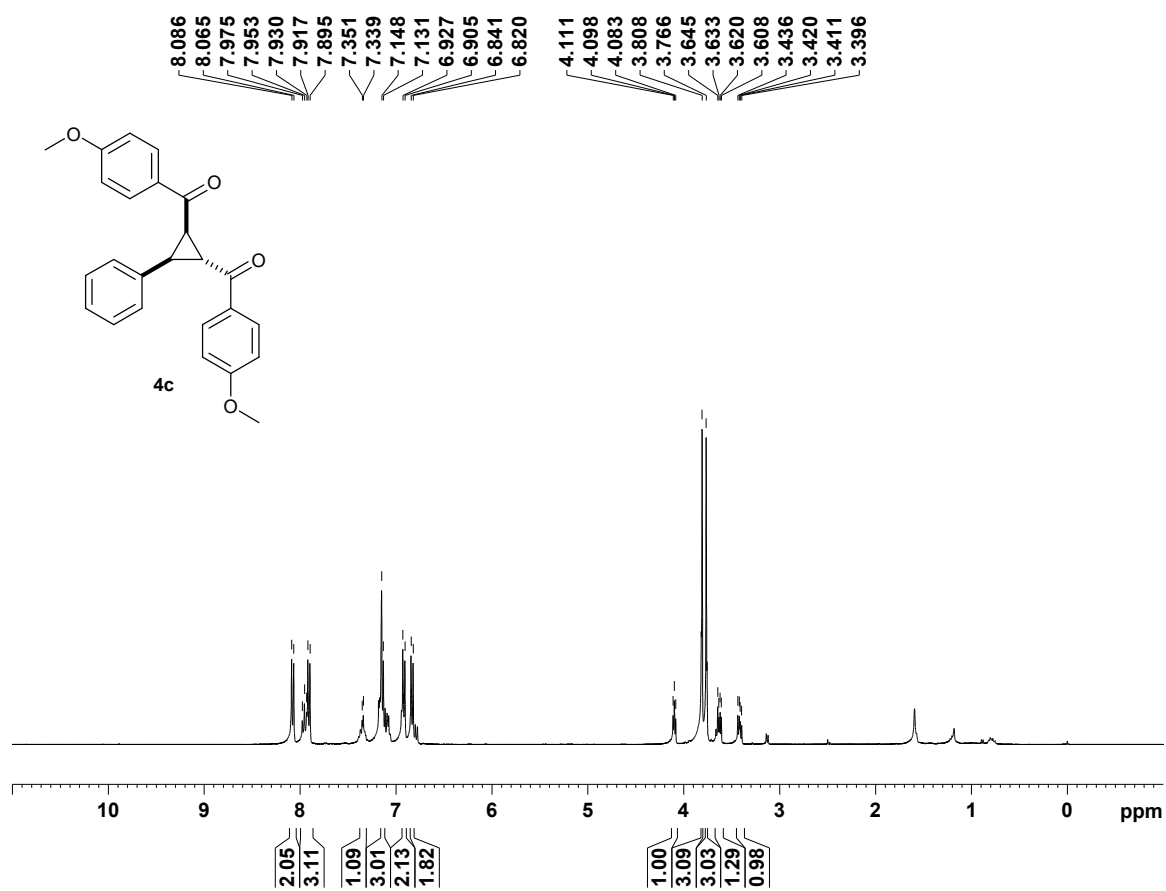

**Figure S19.** <sup>1</sup>H NMR (400 MHz, CDCl<sub>3</sub>) spectrum of **4c**

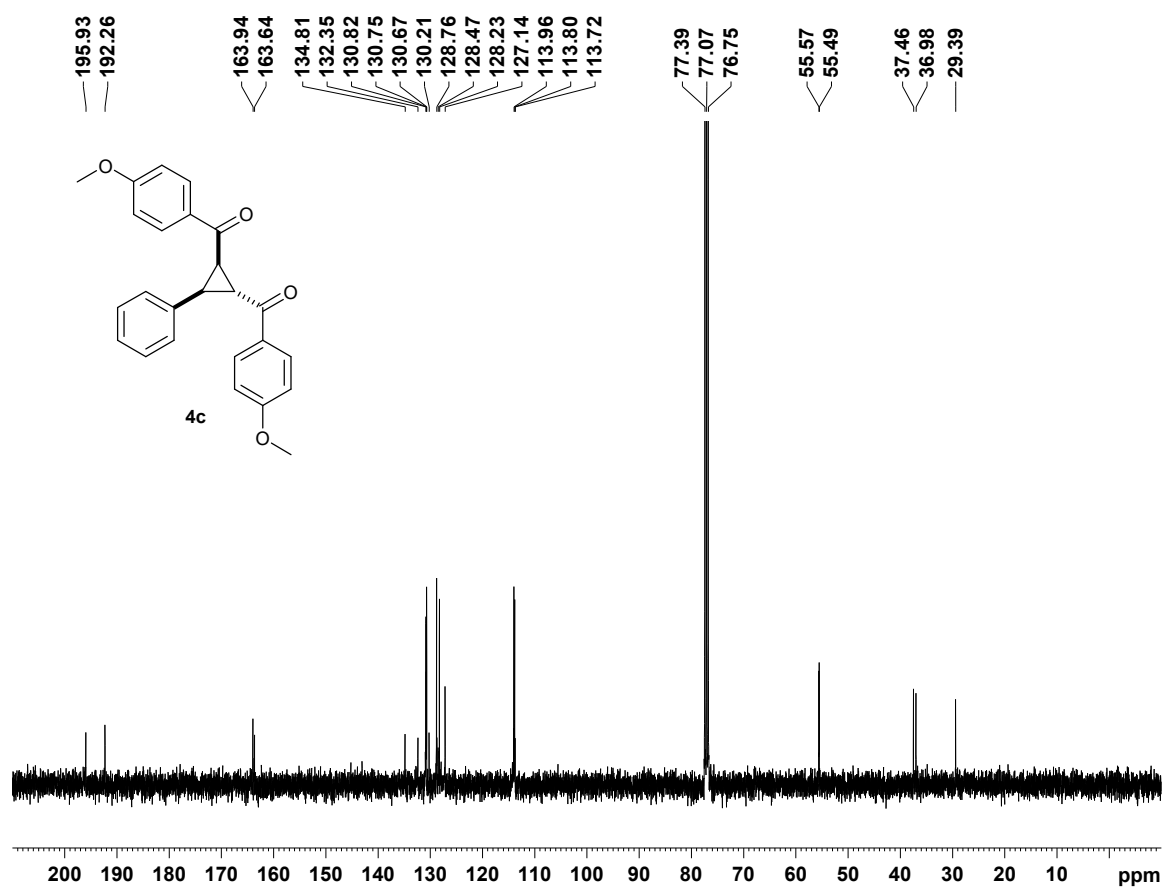

**Figure S20.**  $^{13}\text{C}\{^1\text{H}\}$  NMR (100 MHz,  $\text{CDCl}_3$ ) spectrum of **4c**

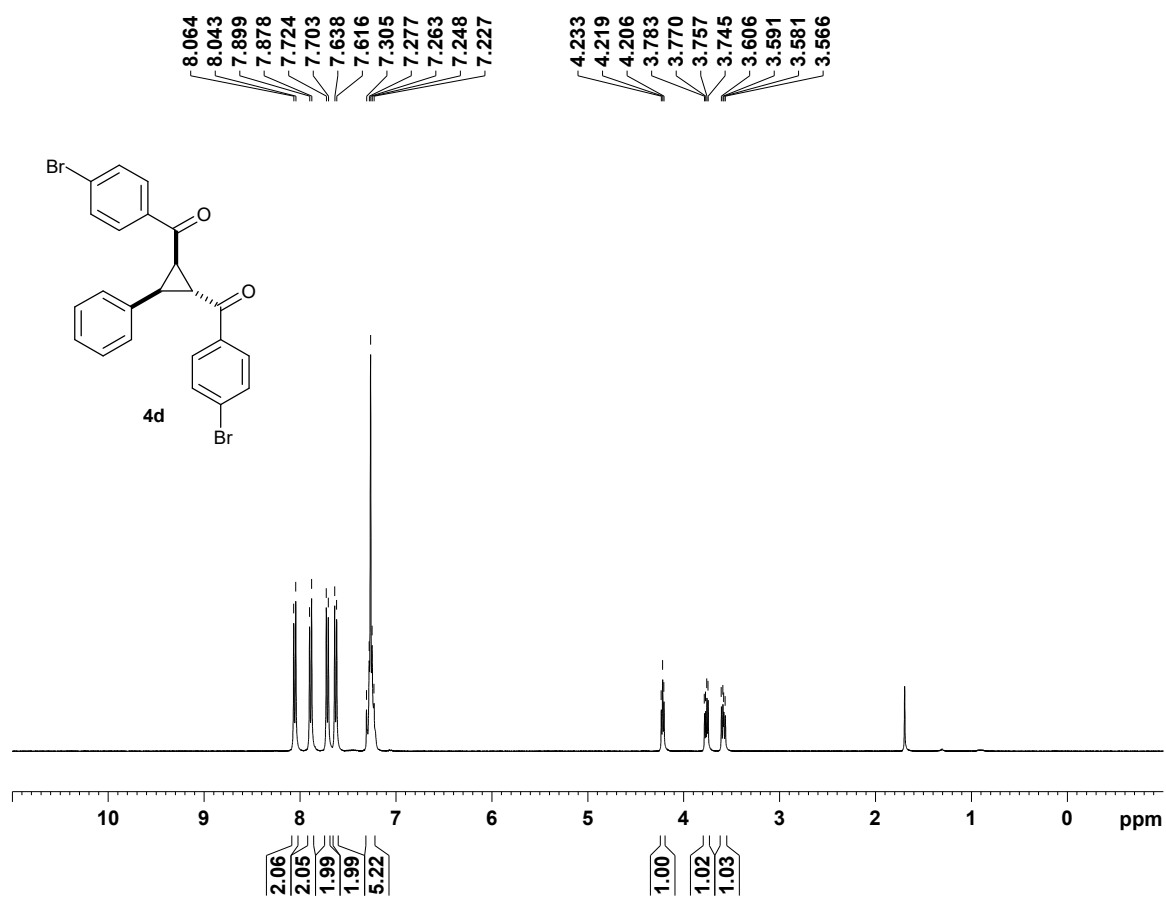

**Figure S21.**  $^1\text{H}$  NMR (400 MHz,  $\text{CDCl}_3$ ) spectrum of **4d**

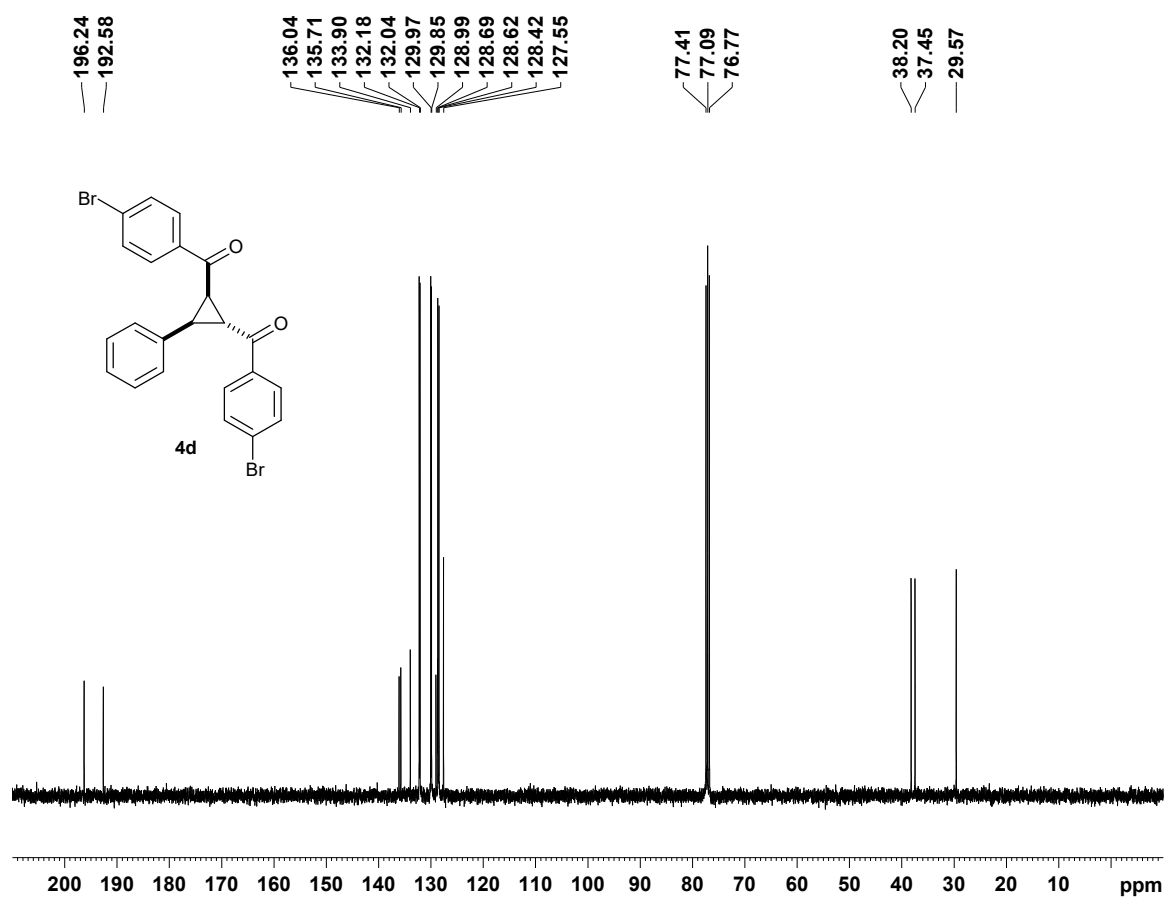

**Figure S22.**  $^{13}\text{C}\{^1\text{H}\}$  NMR (100 MHz,  $\text{CDCl}_3$ ) spectrum of **4d**

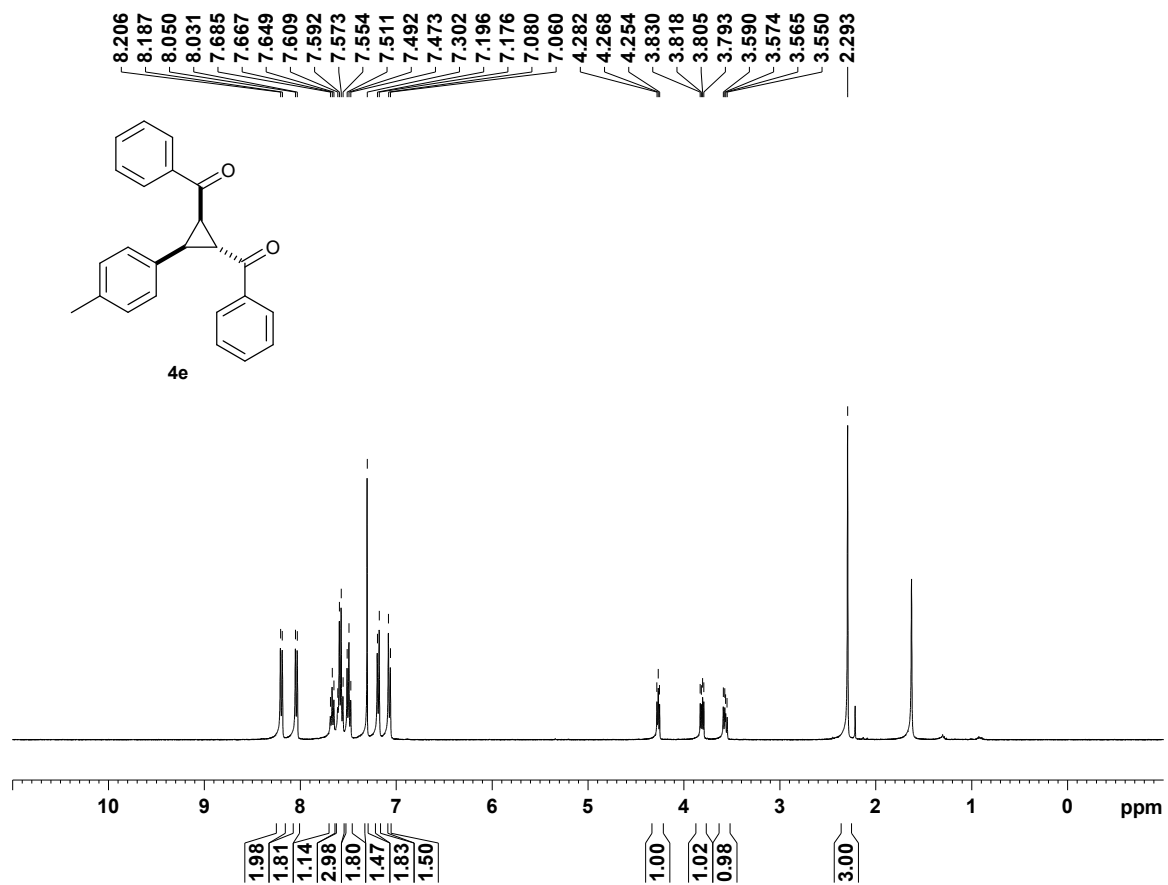

Figure S23.  $^1\text{H}$  NMR (400 MHz,  $\text{CDCl}_3$ ) spectrum of **4e**



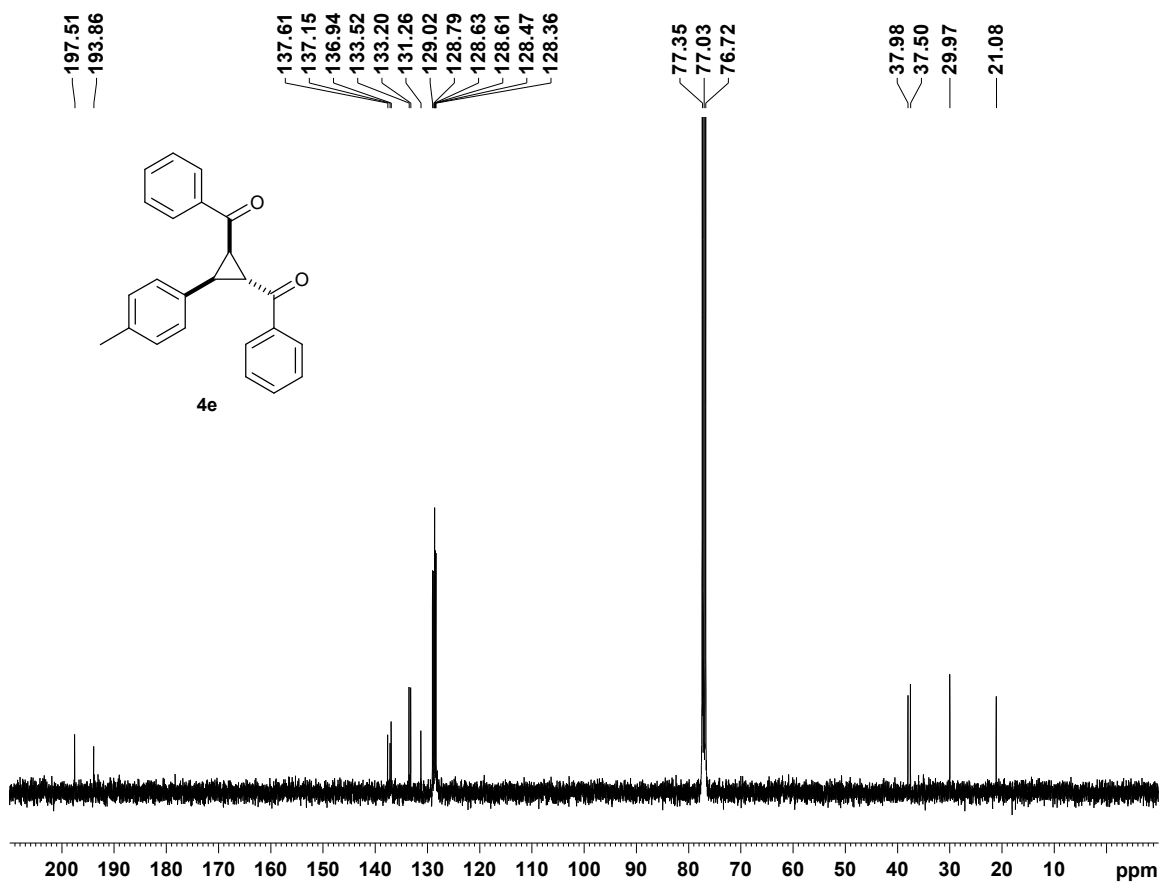

**Figure S24.**  $^{13}\text{C}\{^1\text{H}\}$  NMR (100 MHz,  $\text{CDCl}_3$ ) spectrum of **4e**

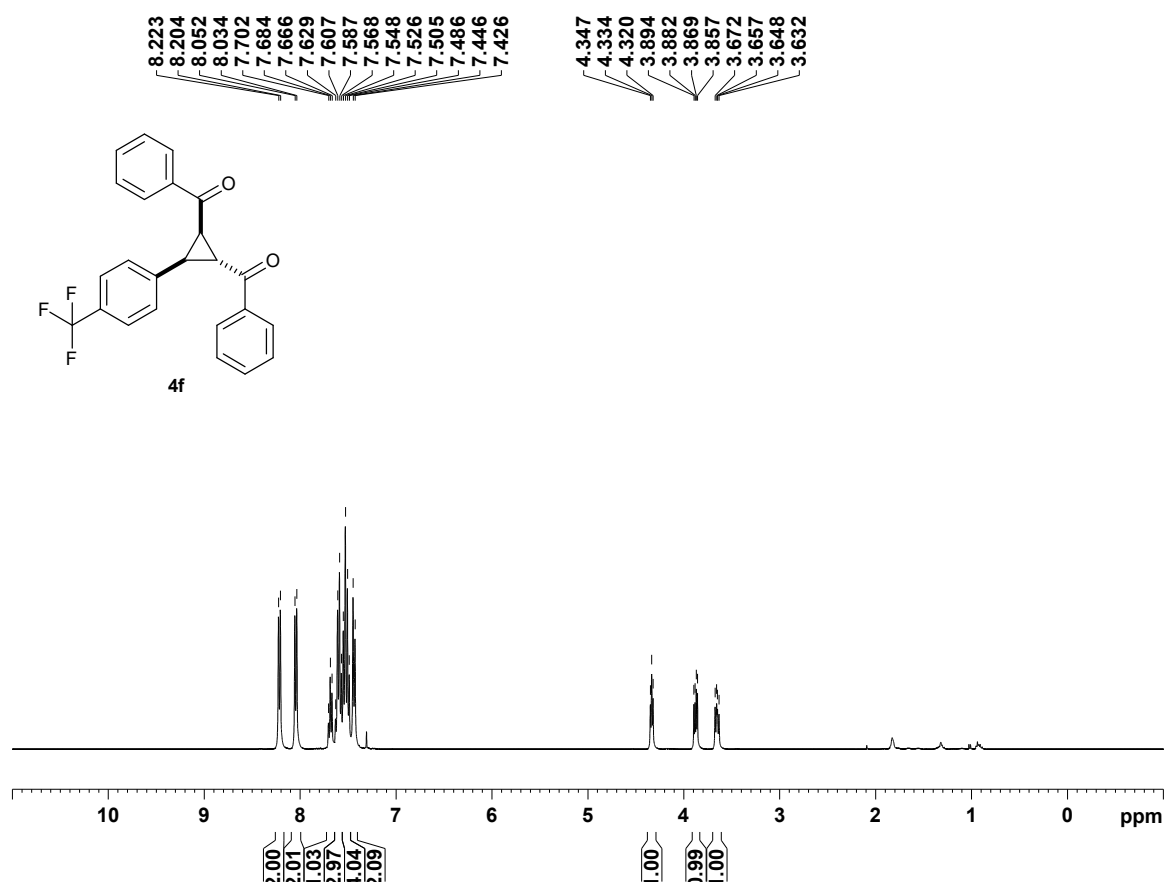

**Figure S25.** <sup>1</sup>H NMR (400 MHz, CDCl<sub>3</sub>) spectrum of **4f**

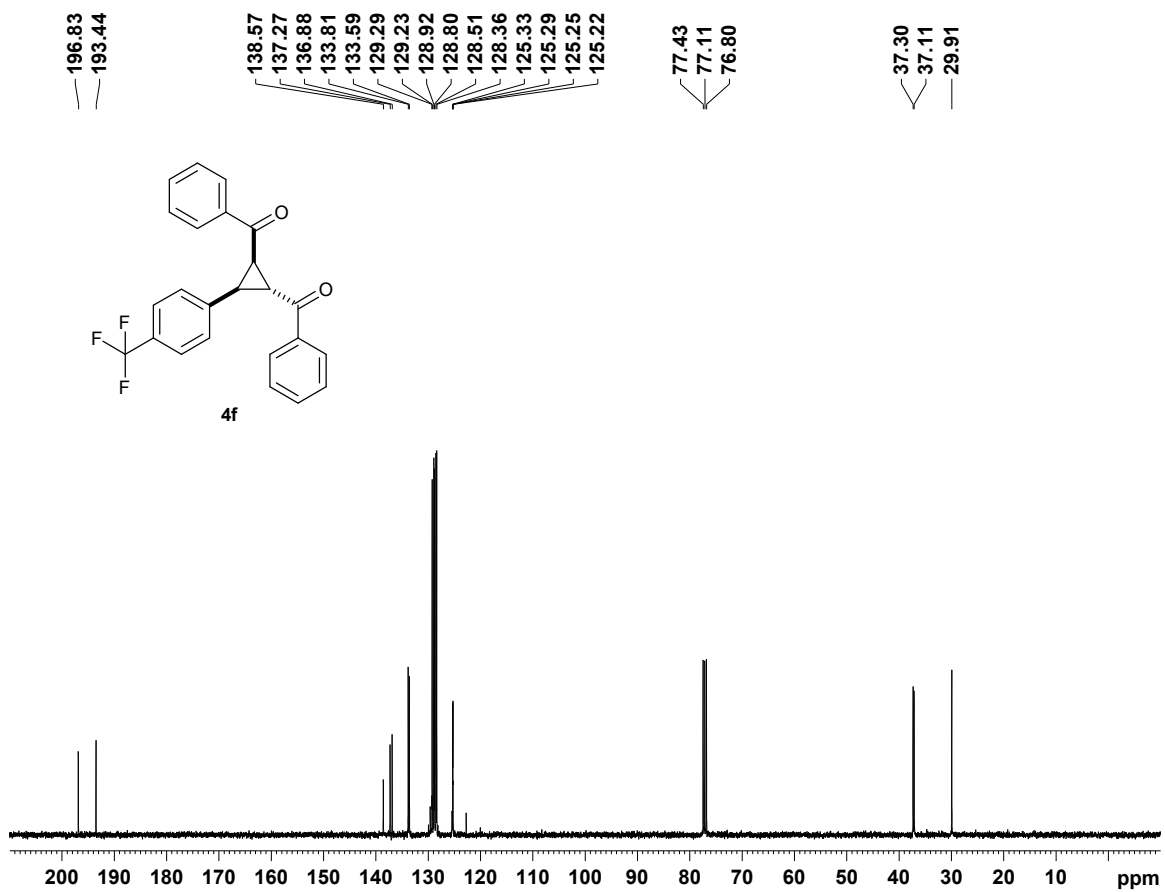

Figure S26.  $^{13}\text{C}\{^1\text{H}\}$  NMR (100 MHz,  $\text{CDCl}_3$ ) spectrum of **4f**

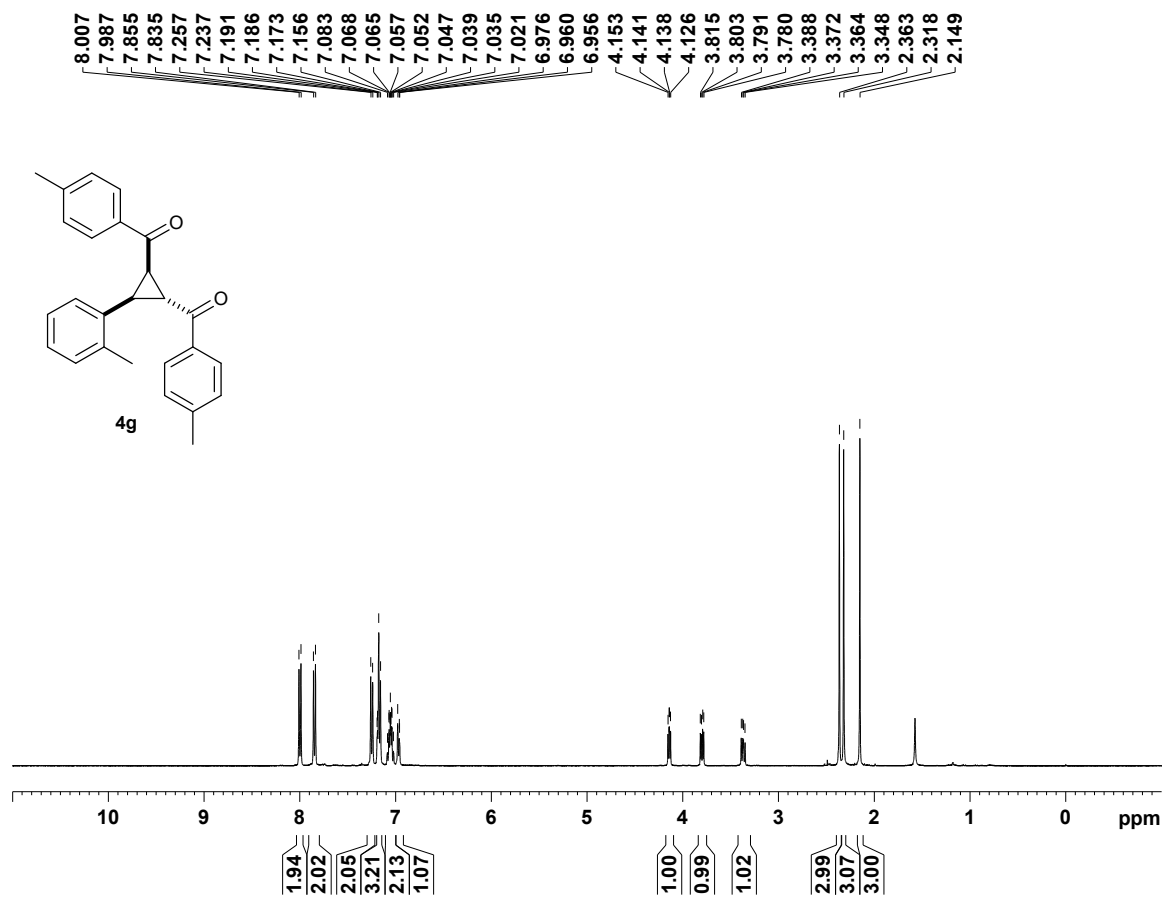

Figure S27.  $^1\text{H}$  NMR (400 MHz,  $\text{CDCl}_3$ ) spectrum of **4g**

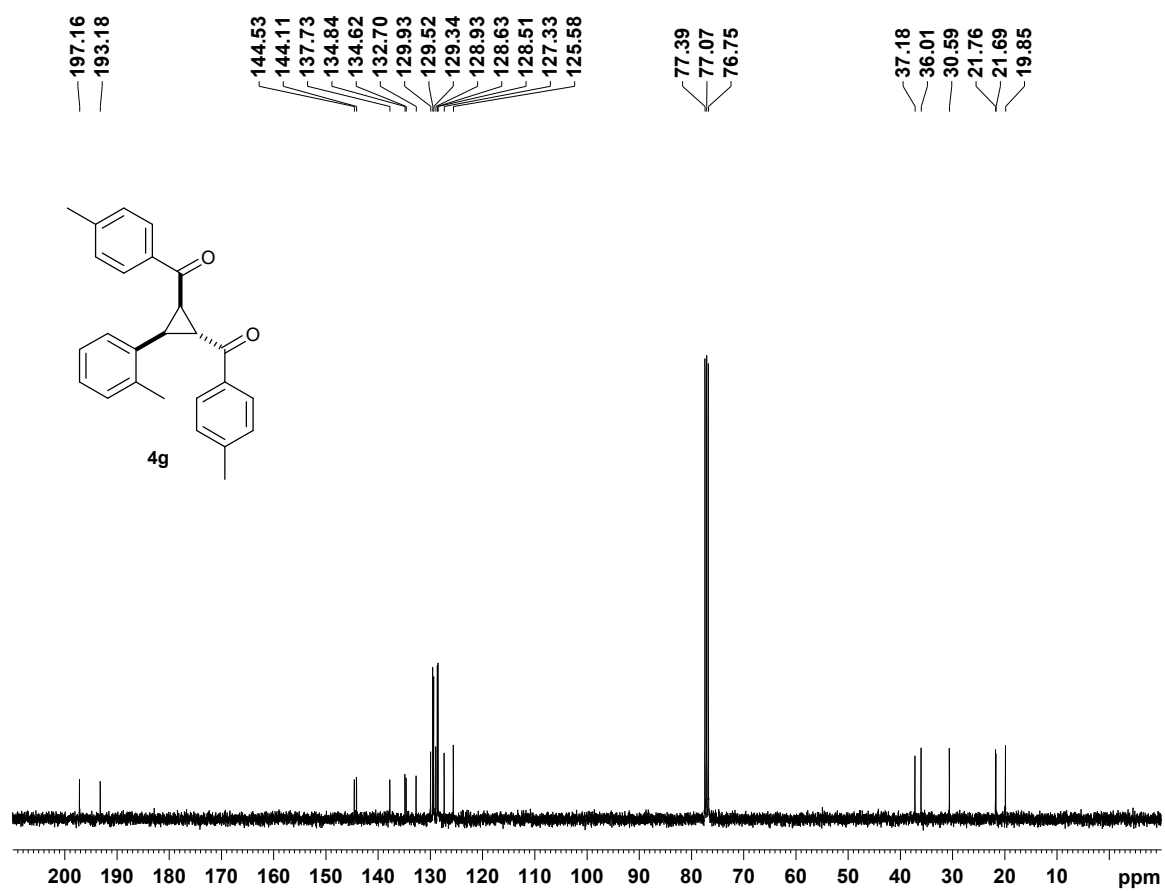

**Figure S28.**  $^{13}\text{C}\{^1\text{H}\}$  NMR (100 MHz,  $\text{CDCl}_3$ ) spectrum of **4g**

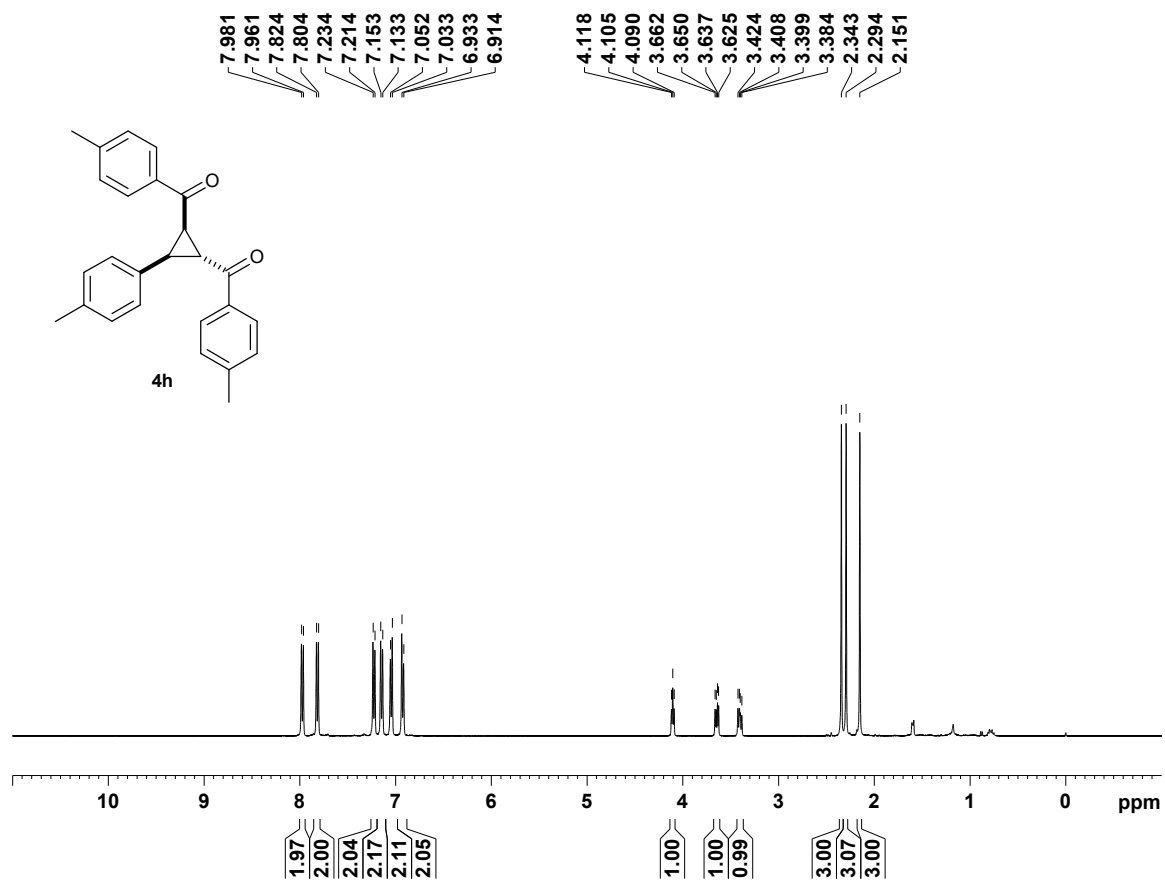

**Figure S29.** <sup>1</sup>H NMR (400 MHz, CDCl<sub>3</sub>) spectrum of **4h**

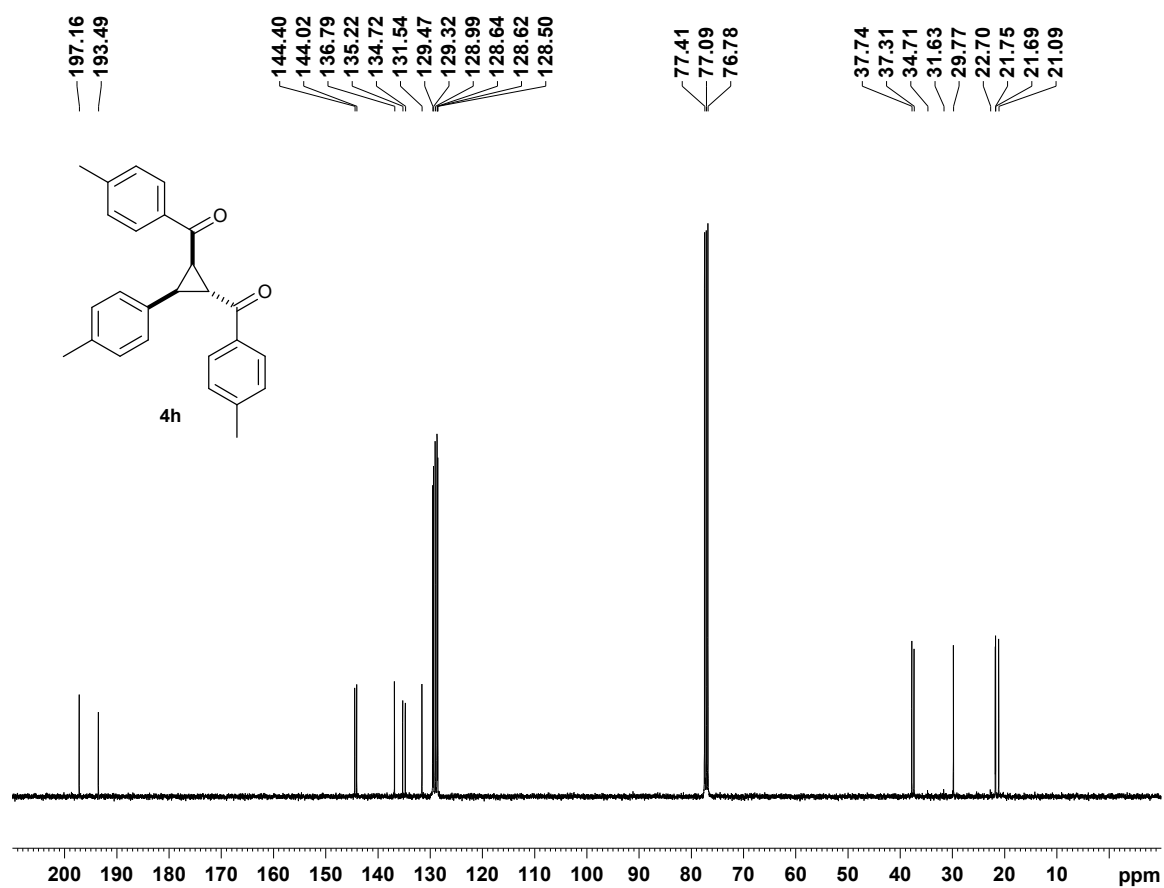

**Figure S30.**  $^{13}\text{C}\{^1\text{H}\}$  NMR (100 MHz,  $\text{CDCl}_3$ ) spectrum of **4h**

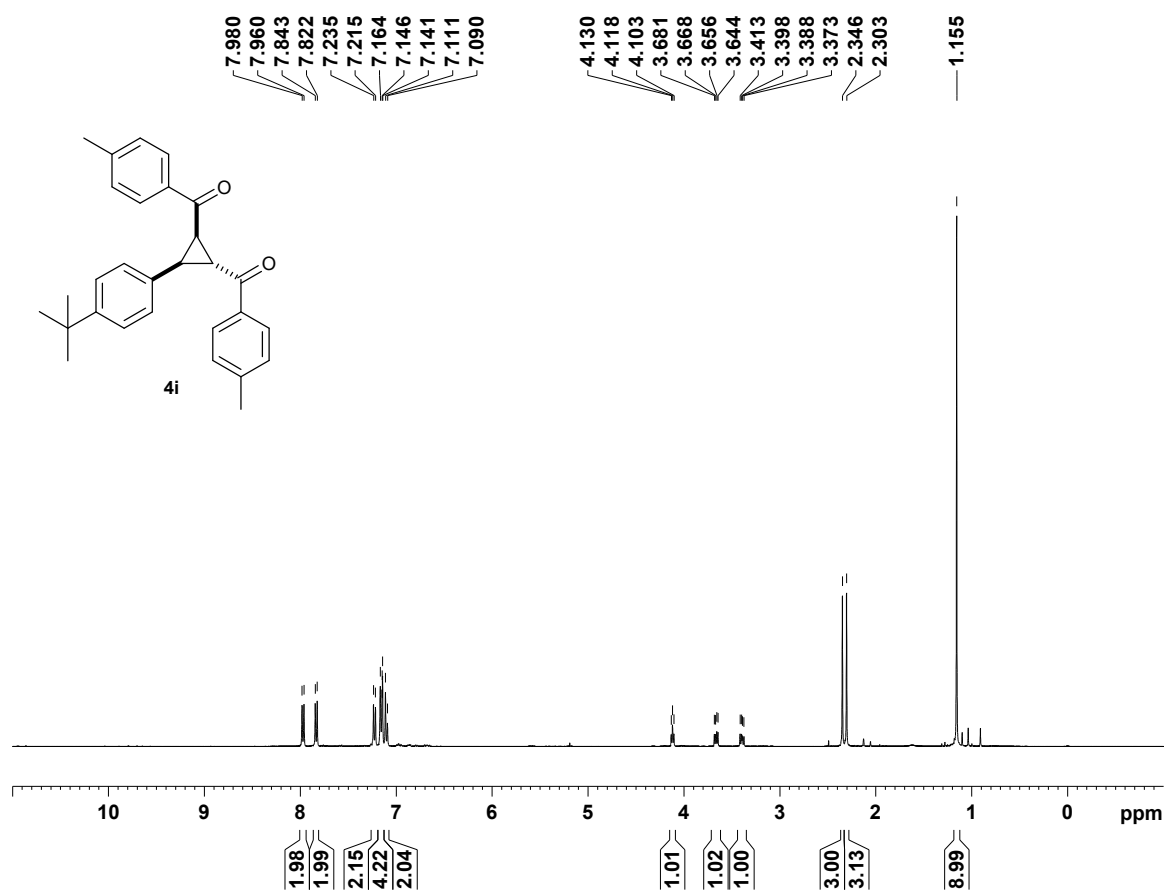

Figure S31.  $^1\text{H}$  NMR (400 MHz,  $\text{CDCl}_3$ ) spectrum of **4i**



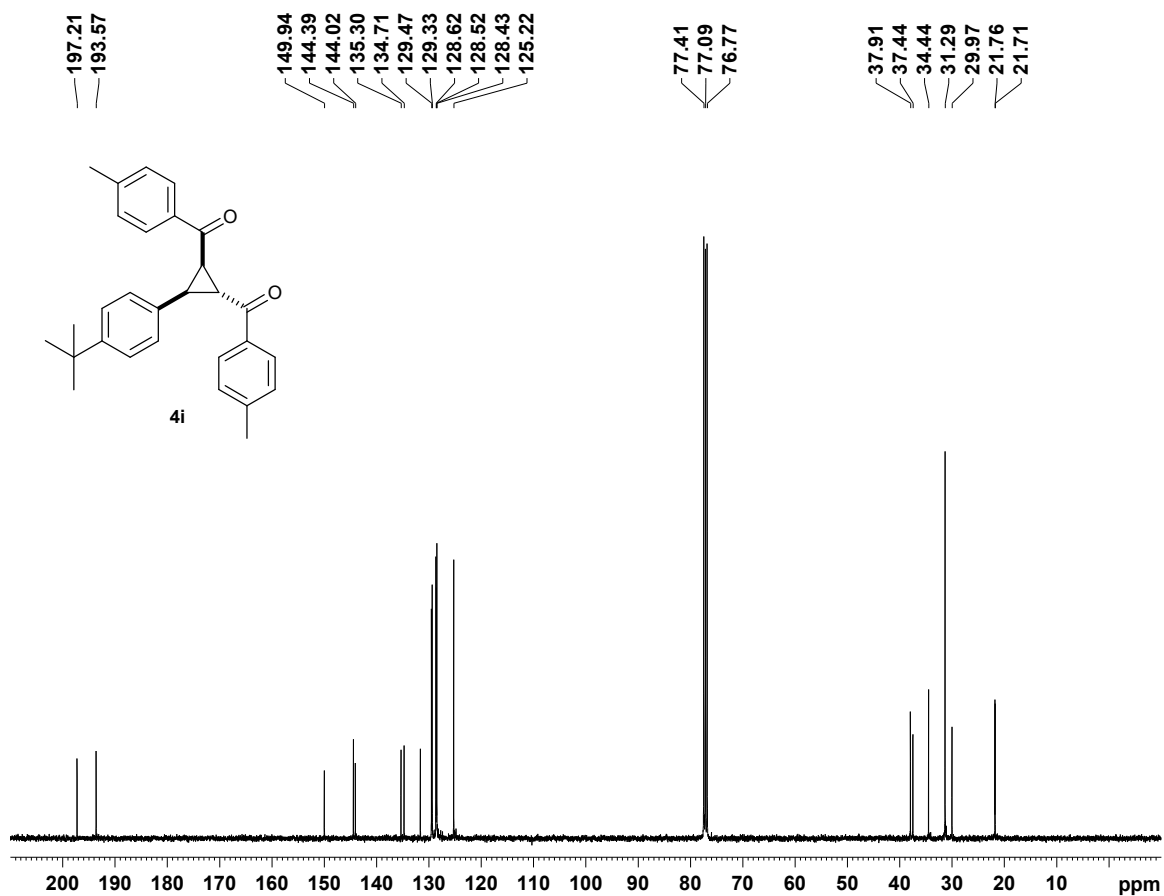

Figure S32.  $^{13}\text{C}\{^1\text{H}\}$  NMR (100 MHz,  $\text{CDCl}_3$ ) spectrum of **4i**

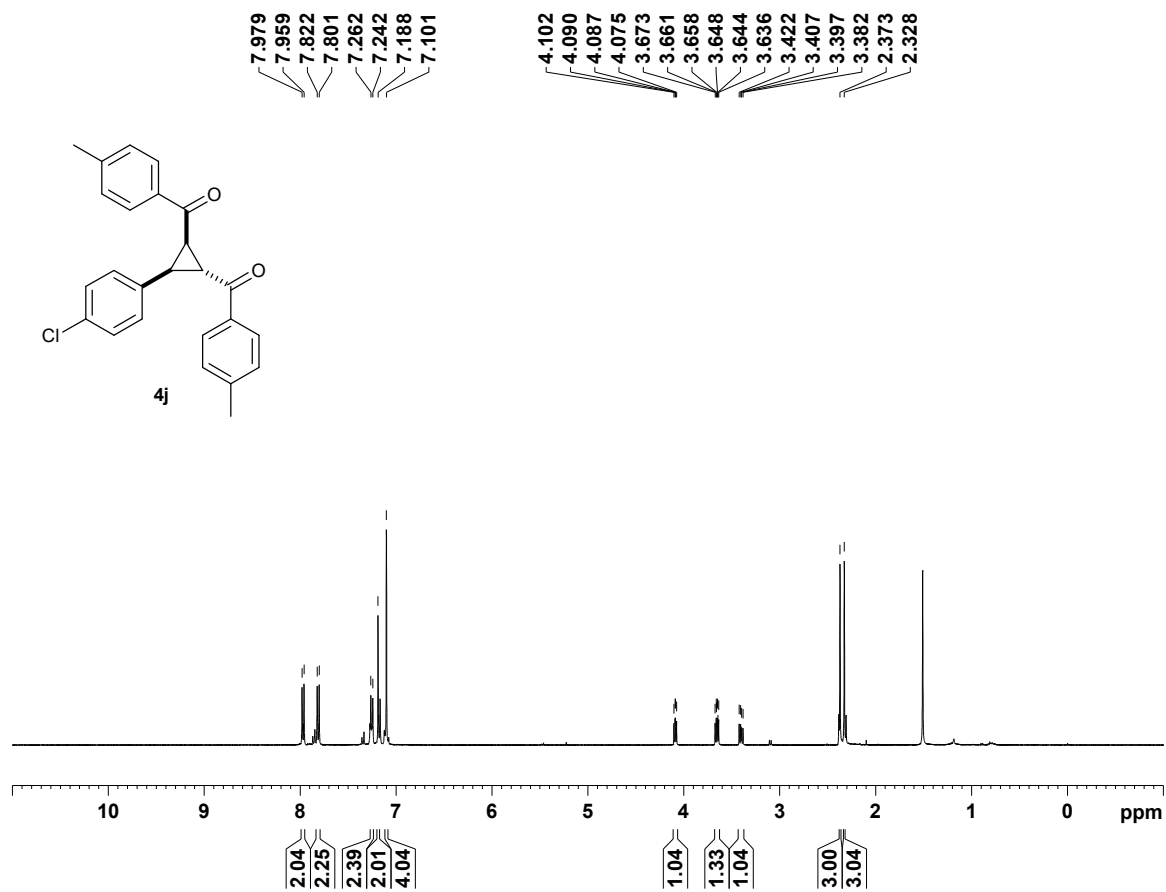

**Figure S33.**  $^1\text{H}$  NMR (400 MHz,  $\text{CDCl}_3$ ) spectrum of **4j**

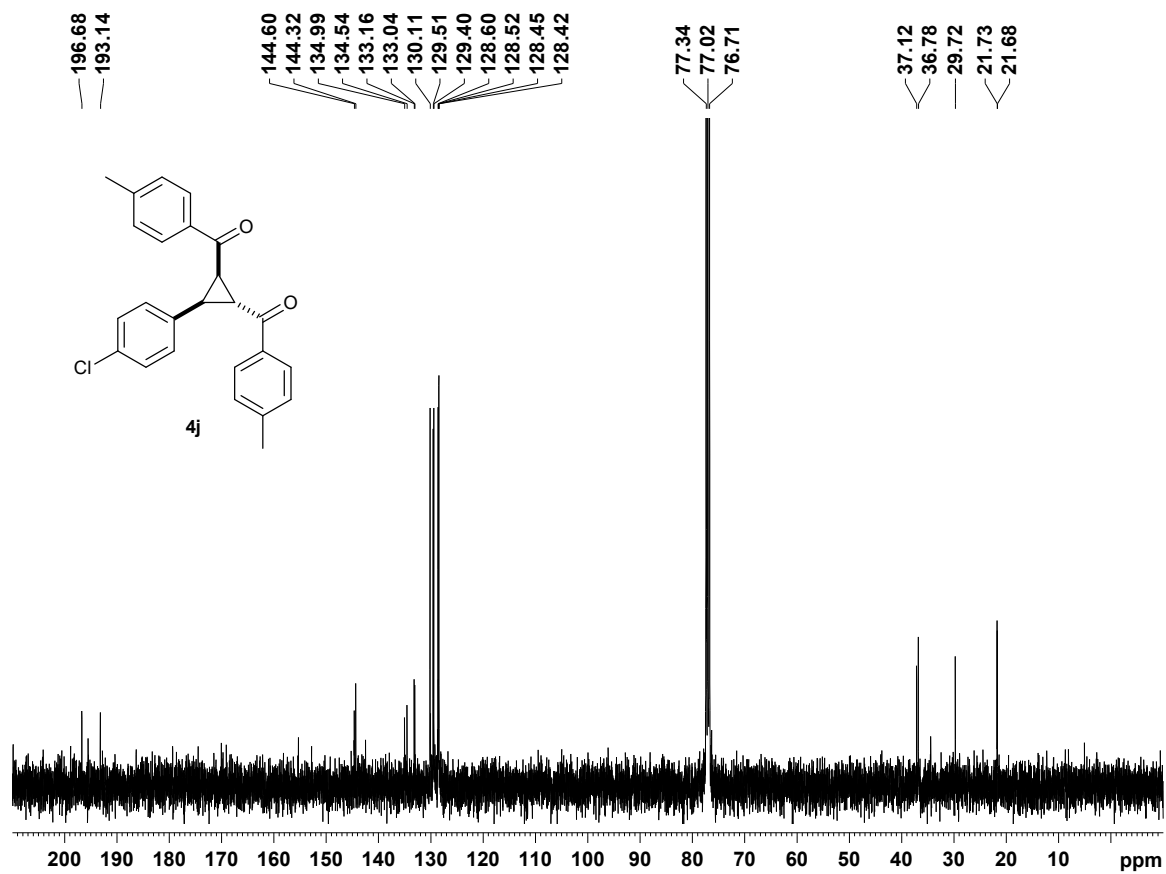

Figure S34.  $^{13}\text{C}\{^1\text{H}\}$  NMR (100 MHz,  $\text{CDCl}_3$ ) spectrum of **4j**

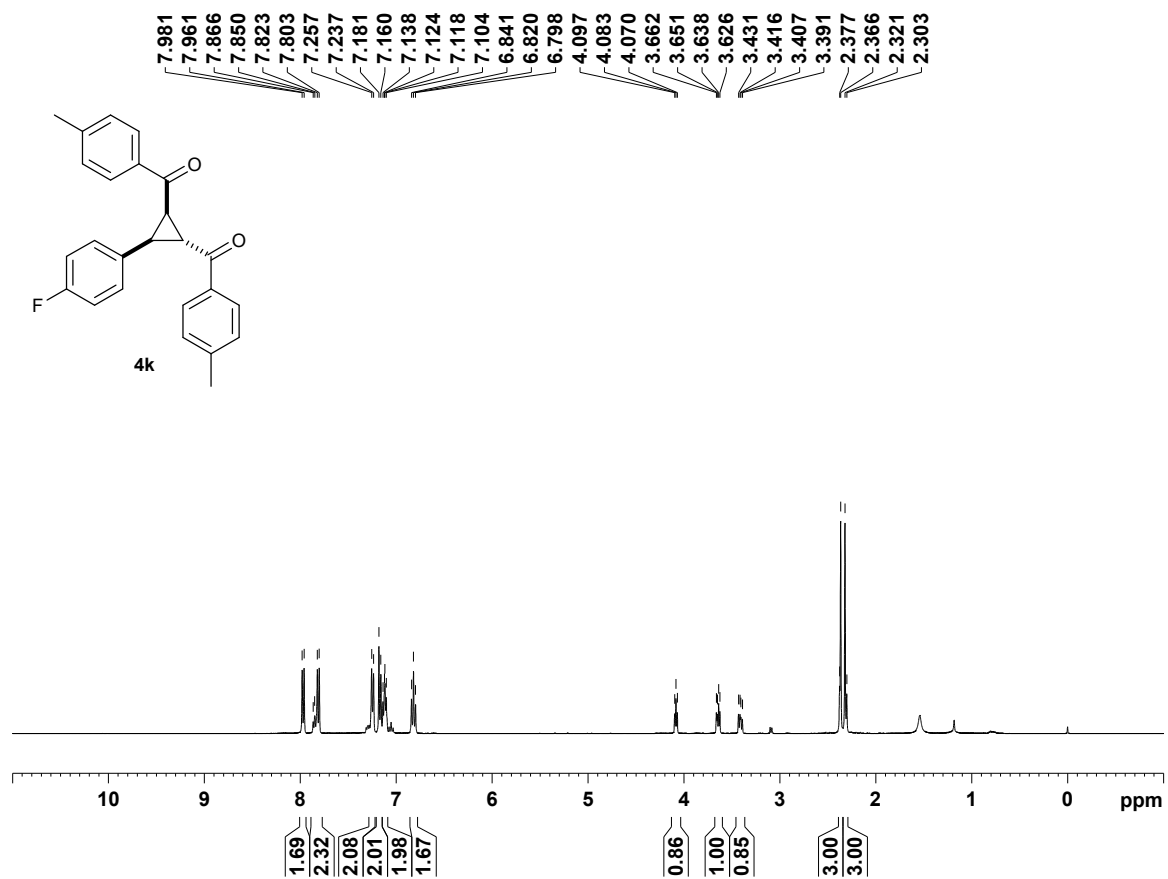

**Figure S35.** <sup>1</sup>H NMR (400 MHz, CDCl<sub>3</sub>) spectrum of **4k**

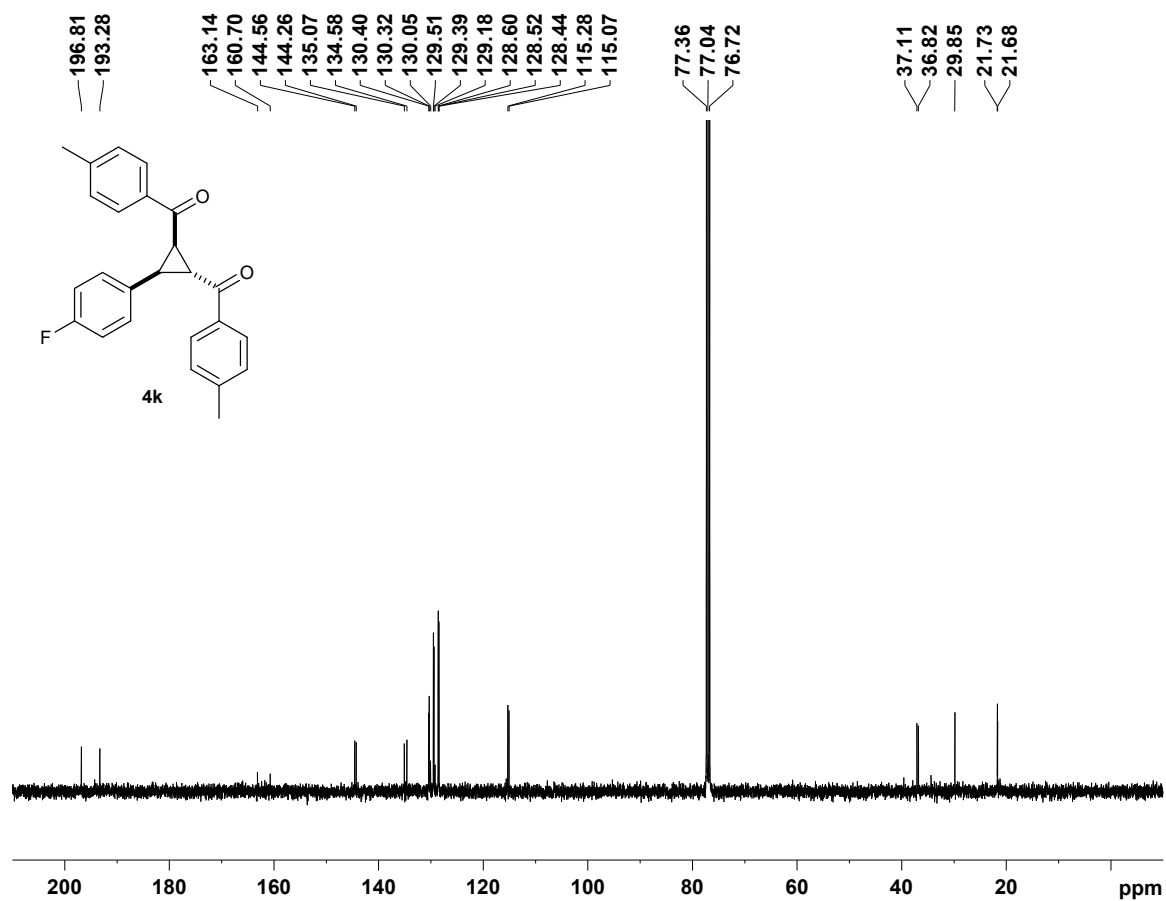

Figure S36.  $^{13}\text{C}\{^1\text{H}\}$  NMR (100 MHz,  $\text{CDCl}_3$ ) spectrum of **4k**

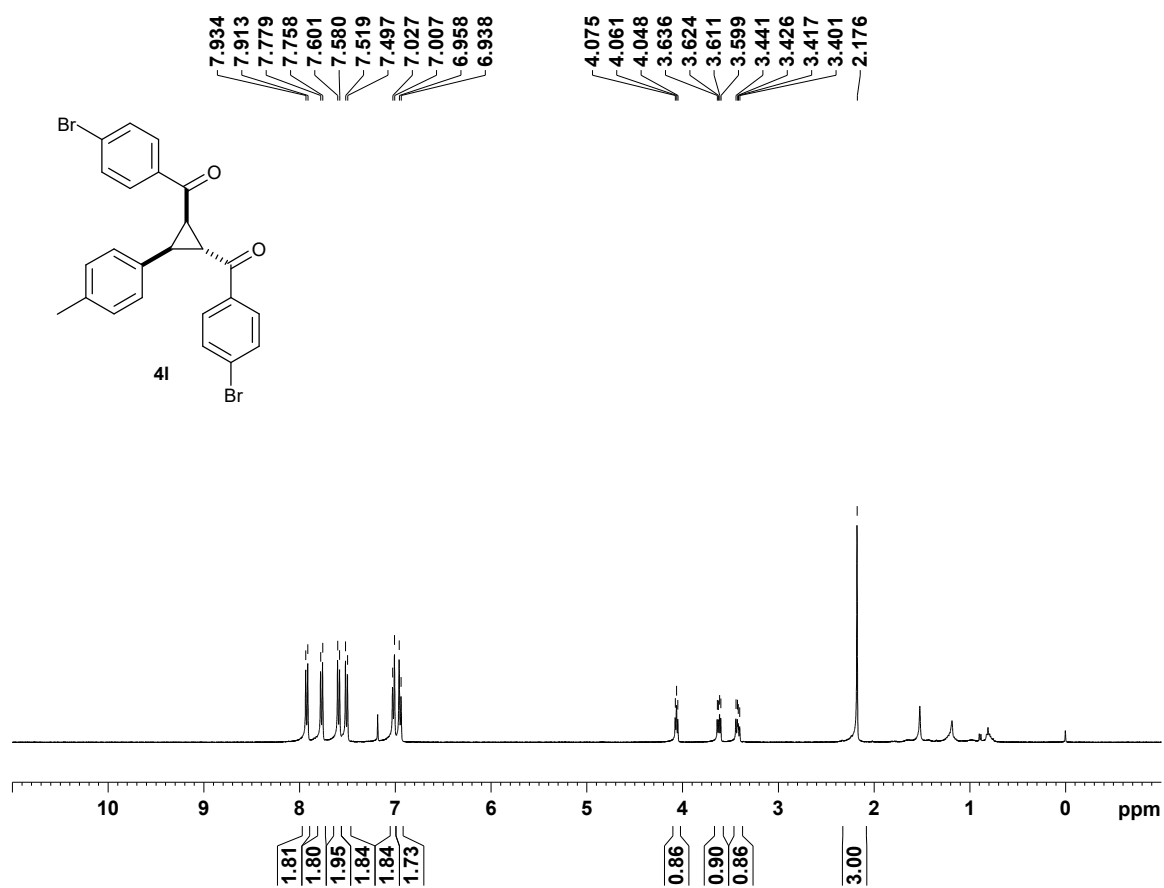

Figure S37.  $^1\text{H}$  NMR (400 MHz,  $\text{CDCl}_3$ ) spectrum of **4I**

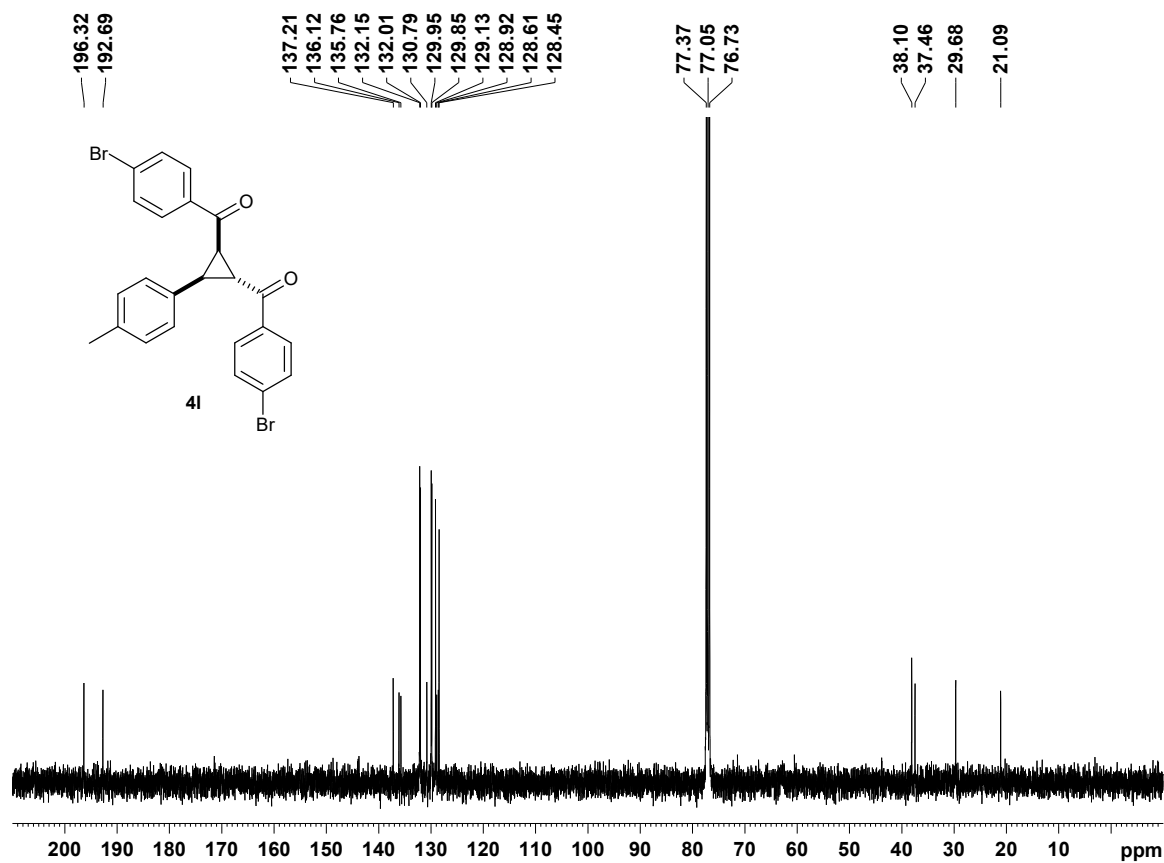

Figure S38.  $^{13}\text{C}\{^1\text{H}\}$  NMR (100 MHz,  $\text{CDCl}_3$ ) spectrum of 4l

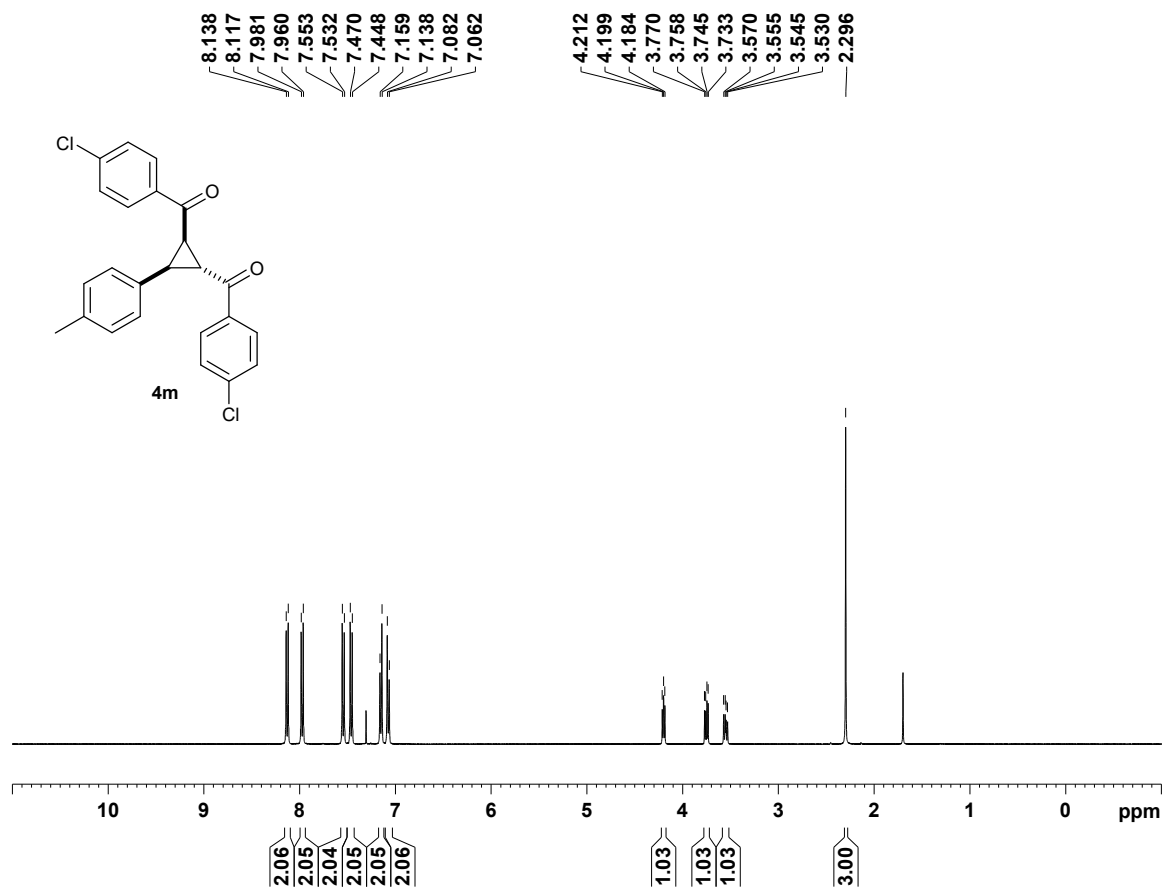

**Figure S39.** <sup>1</sup>H NMR (400 MHz, CDCl<sub>3</sub>) spectrum of **4m**



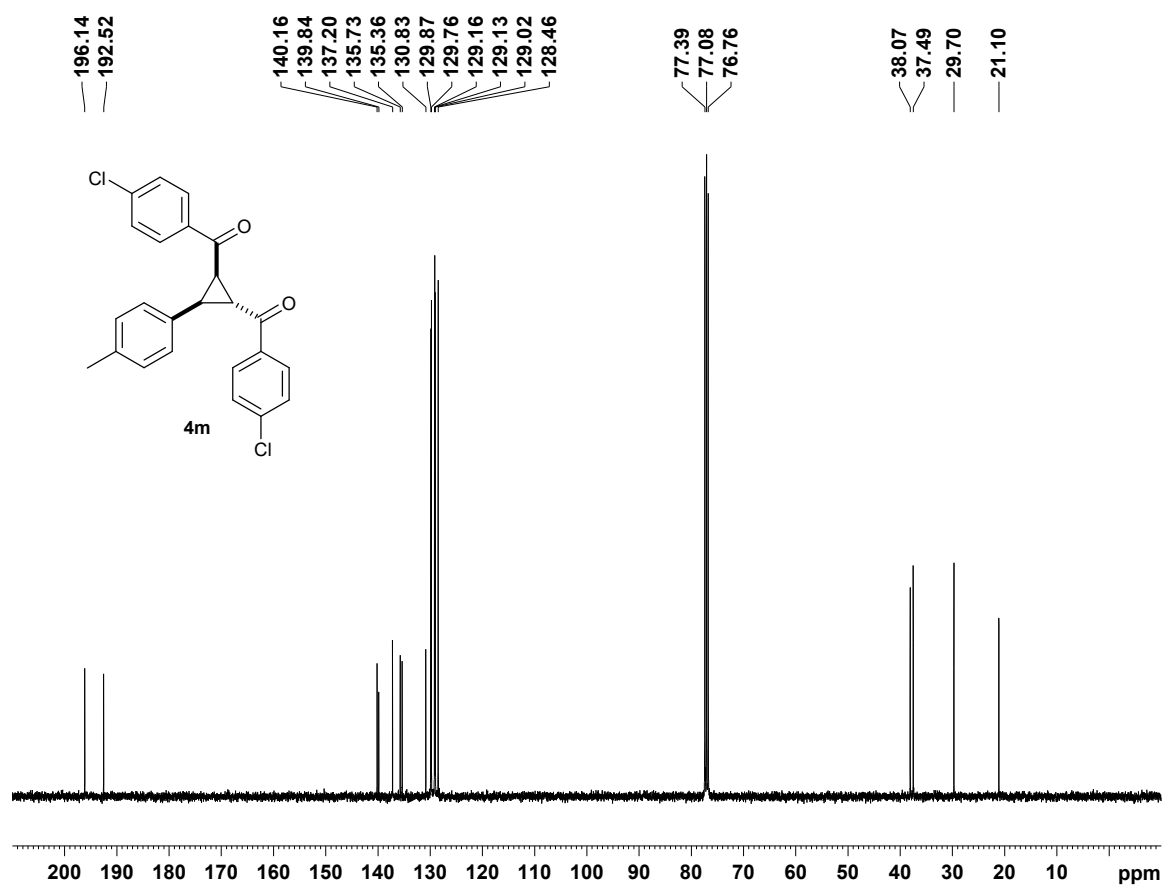

Figure S40.  $^{13}\text{C}\{^1\text{H}\}$  NMR (100 MHz,  $\text{CDCl}_3$ ) spectrum of **4m**

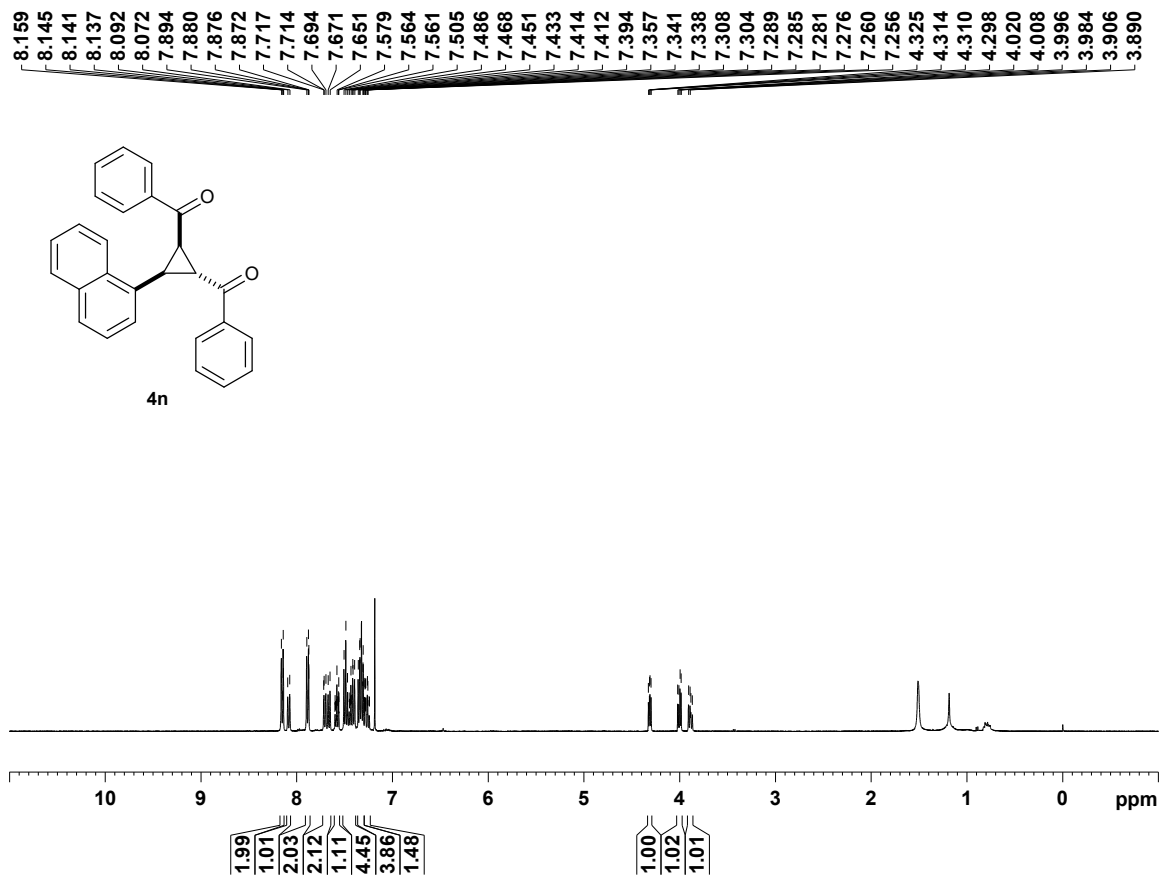

Figure S41. <sup>1</sup>H NMR (400 MHz, CDCl<sub>3</sub>) spectrum of **4n**

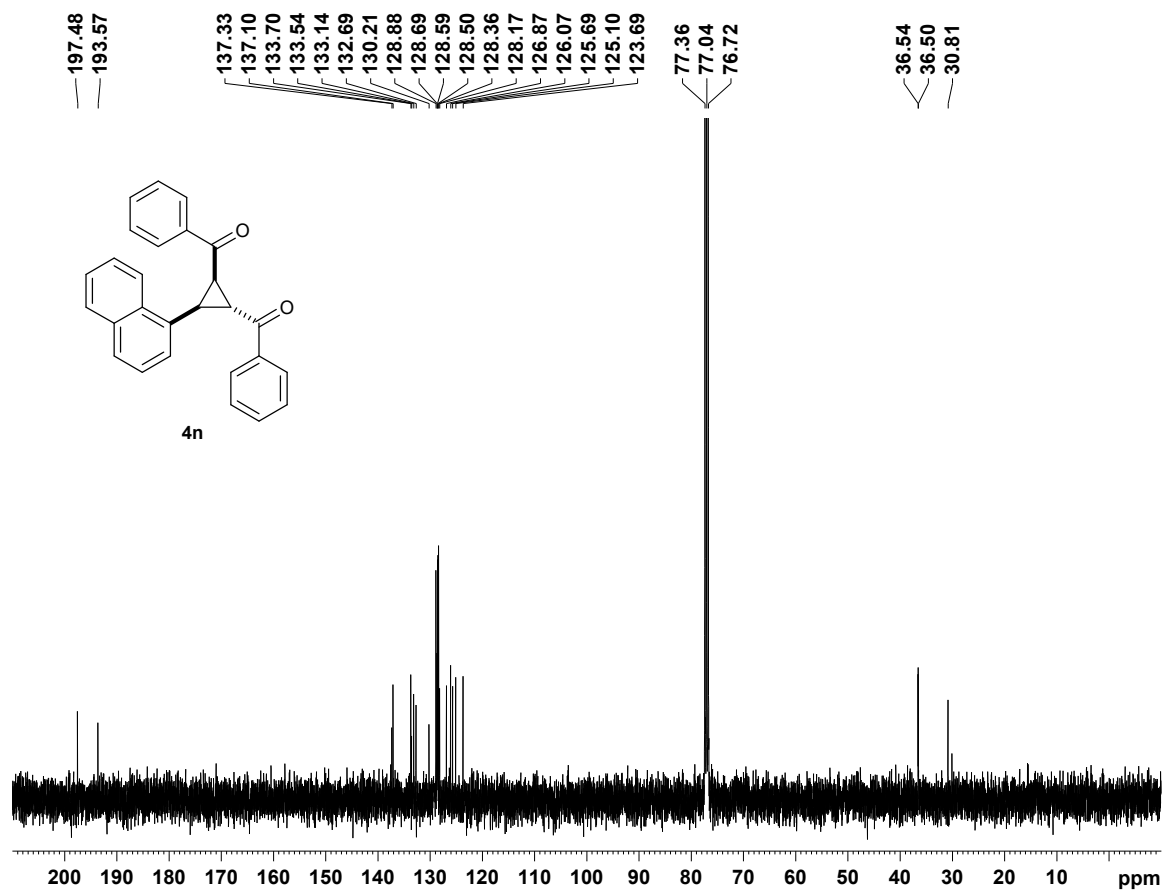

Figure S42.  $^{13}\text{C}\{^1\text{H}\}$  NMR (100 MHz,  $\text{CDCl}_3$ ) spectrum of **4n**

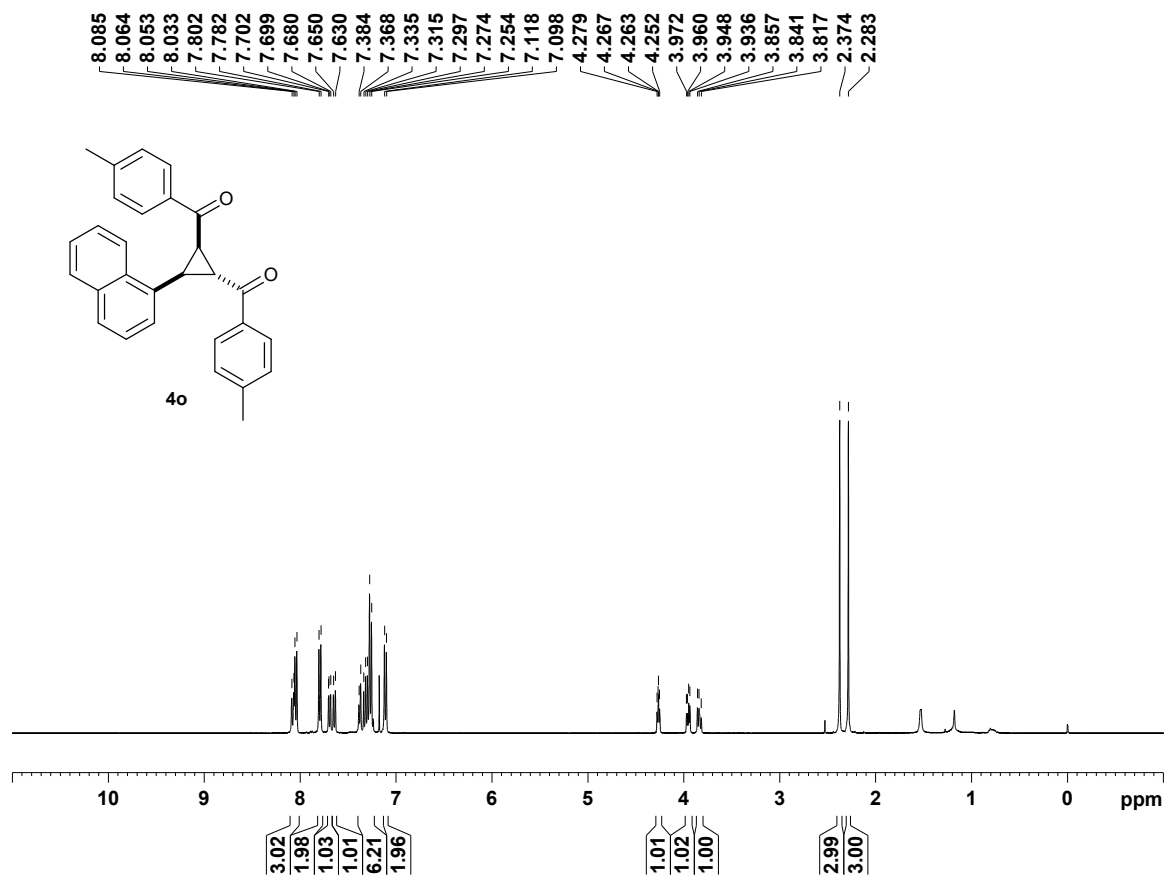

**Figure S43.** <sup>1</sup>H NMR (400 MHz, CDCl<sub>3</sub>) spectrum of **4o**

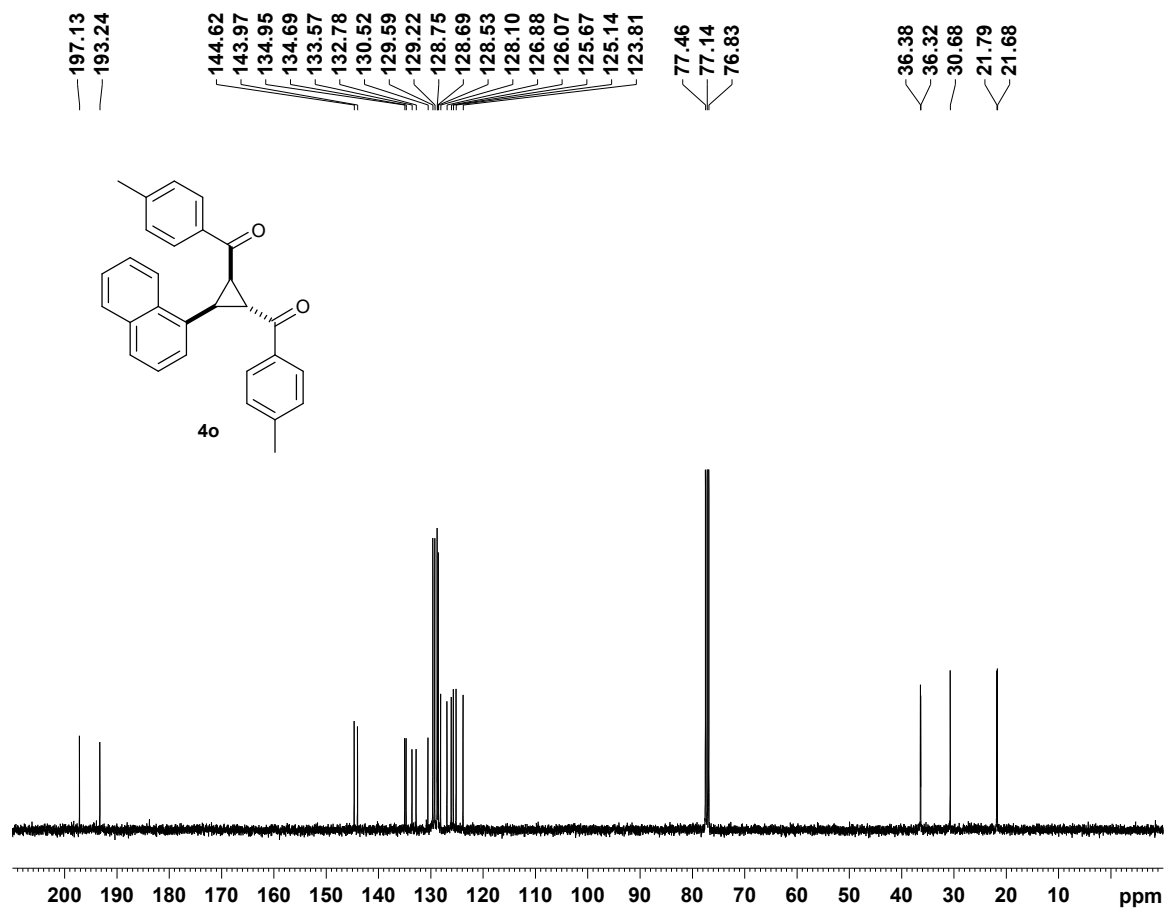

Figure S44.  $^{13}\text{C}\{^1\text{H}\}$  NMR (100 MHz,  $\text{CDCl}_3$ ) spectrum of **4o**

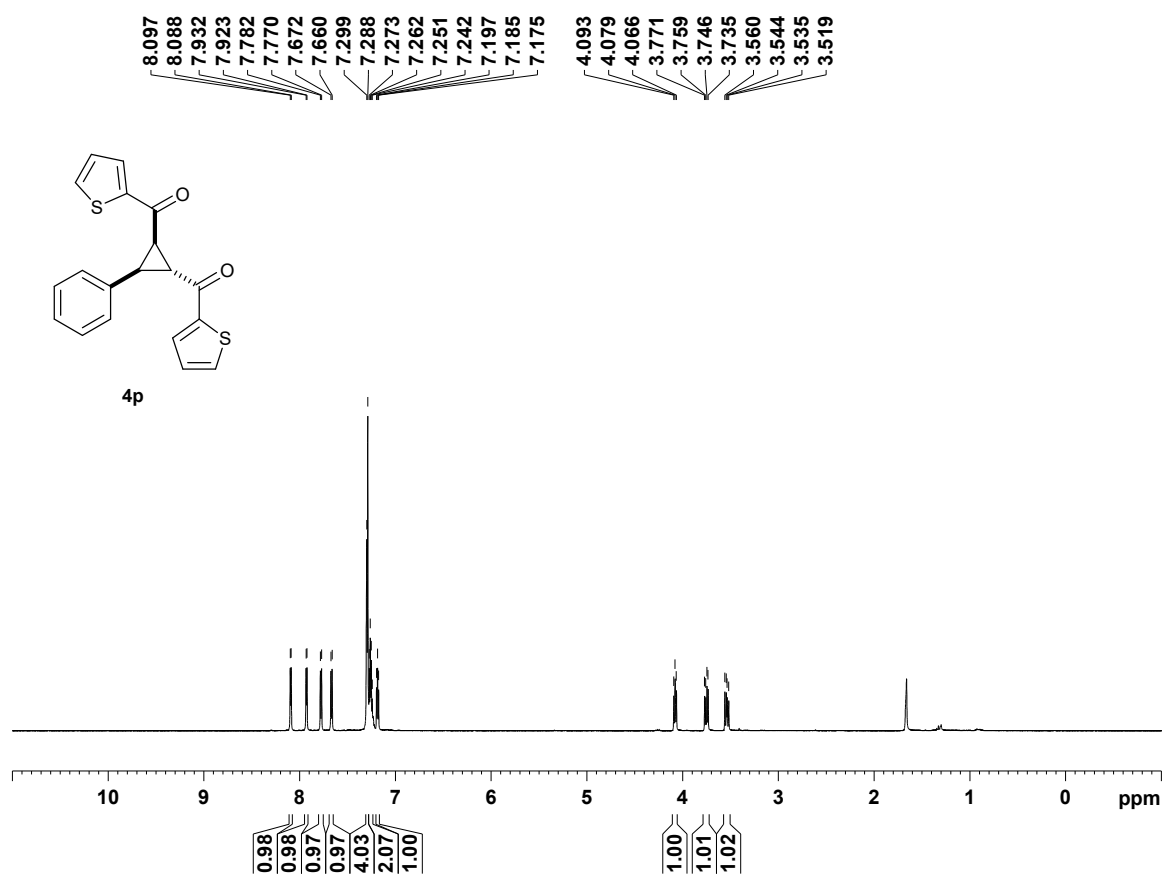

Figure S45. <sup>1</sup>H NMR (400 MHz, CDCl<sub>3</sub>) spectrum of **4p**

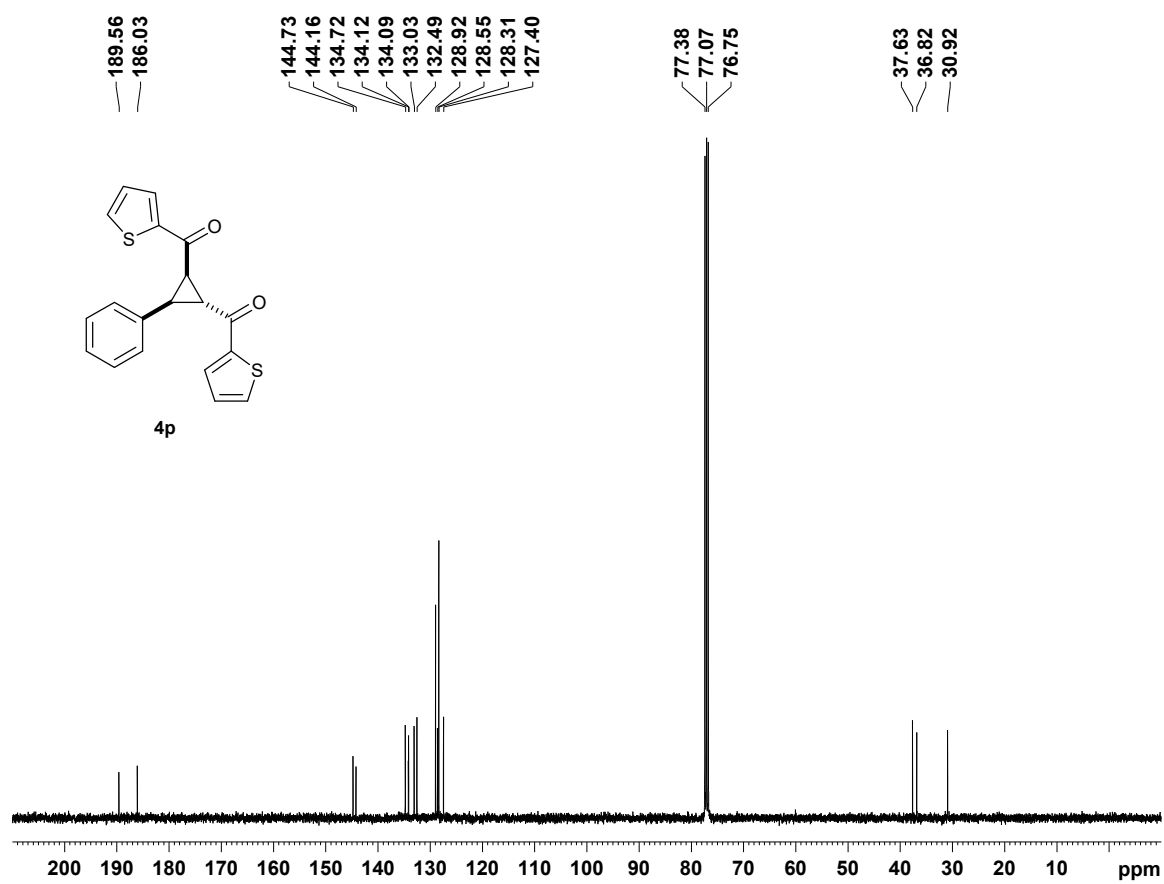

**Figure S46.**  $^{13}\text{C}\{^1\text{H}\}$  NMR (100 MHz,  $\text{CDCl}_3$ ) spectrum of **4p**

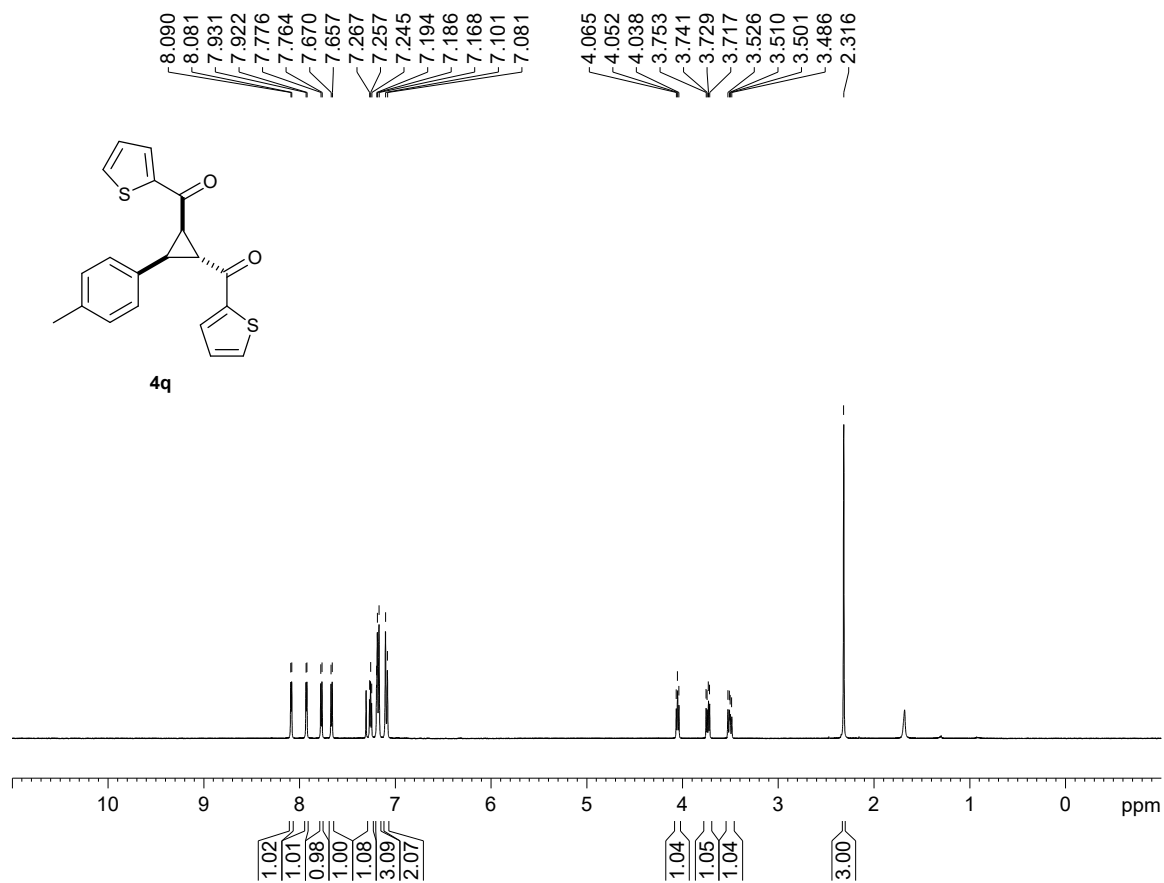

**Figure S47.** <sup>1</sup>H NMR (400 MHz, CDCl<sub>3</sub>) spectrum of **4q**



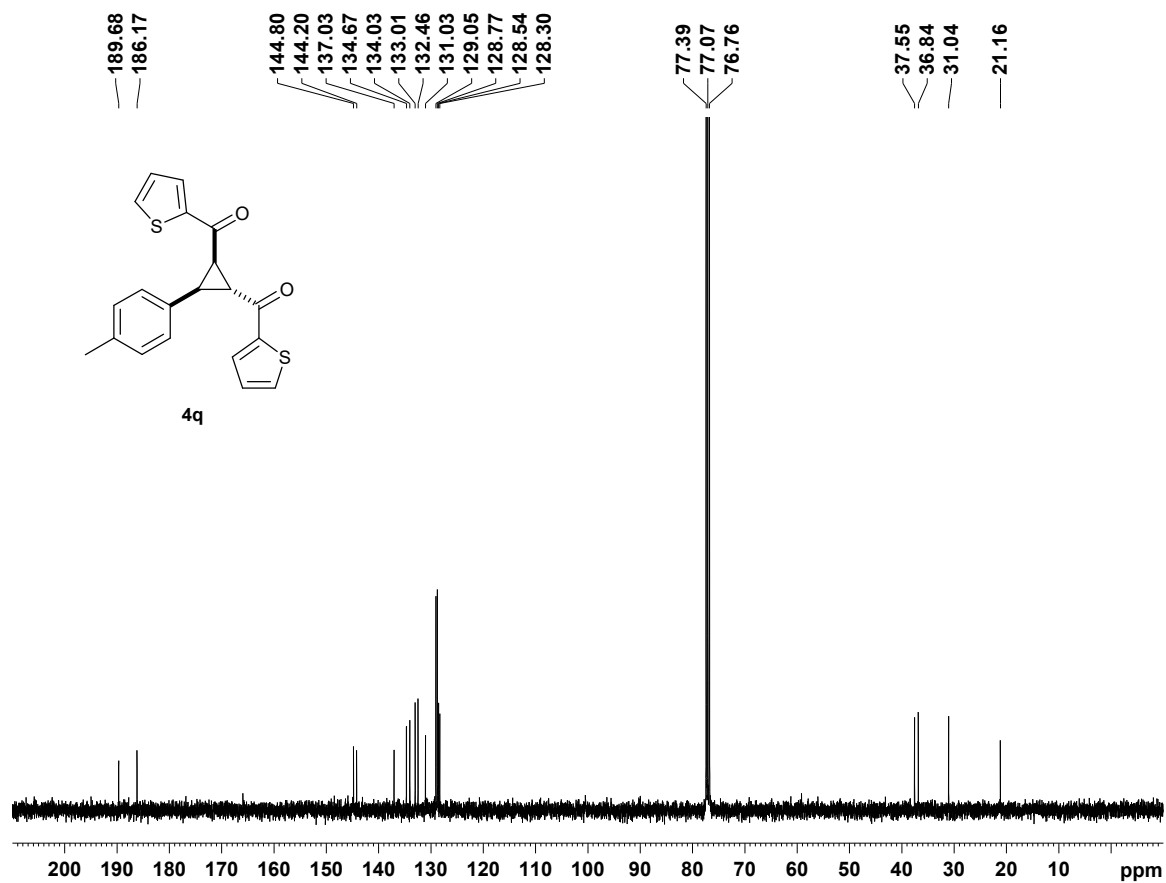

**Figure S48.**  $^{13}\text{C}\{^1\text{H}\}$  NMR (100 MHz,  $\text{CDCl}_3$ ) spectrum of **4q**

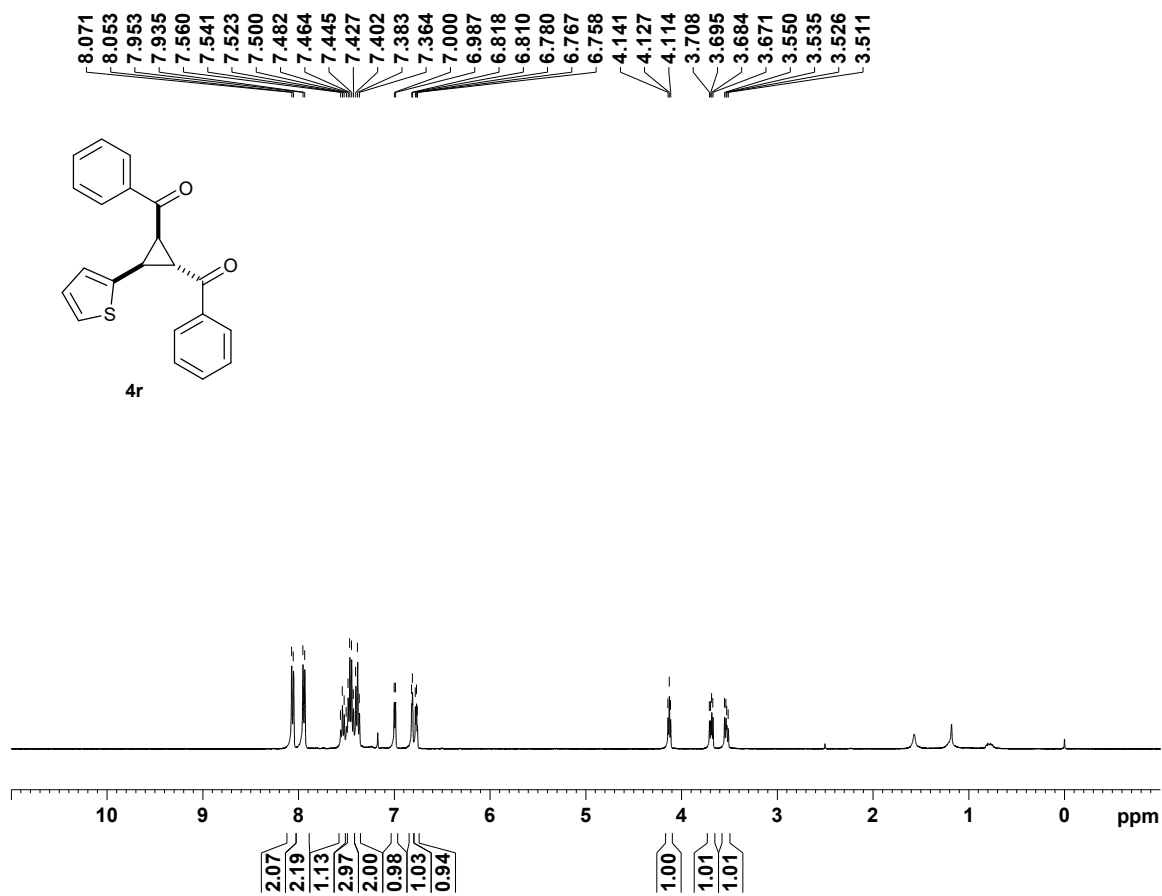

Figure S49. <sup>1</sup>H NMR (400 MHz, CDCl<sub>3</sub>) spectrum of **4r**

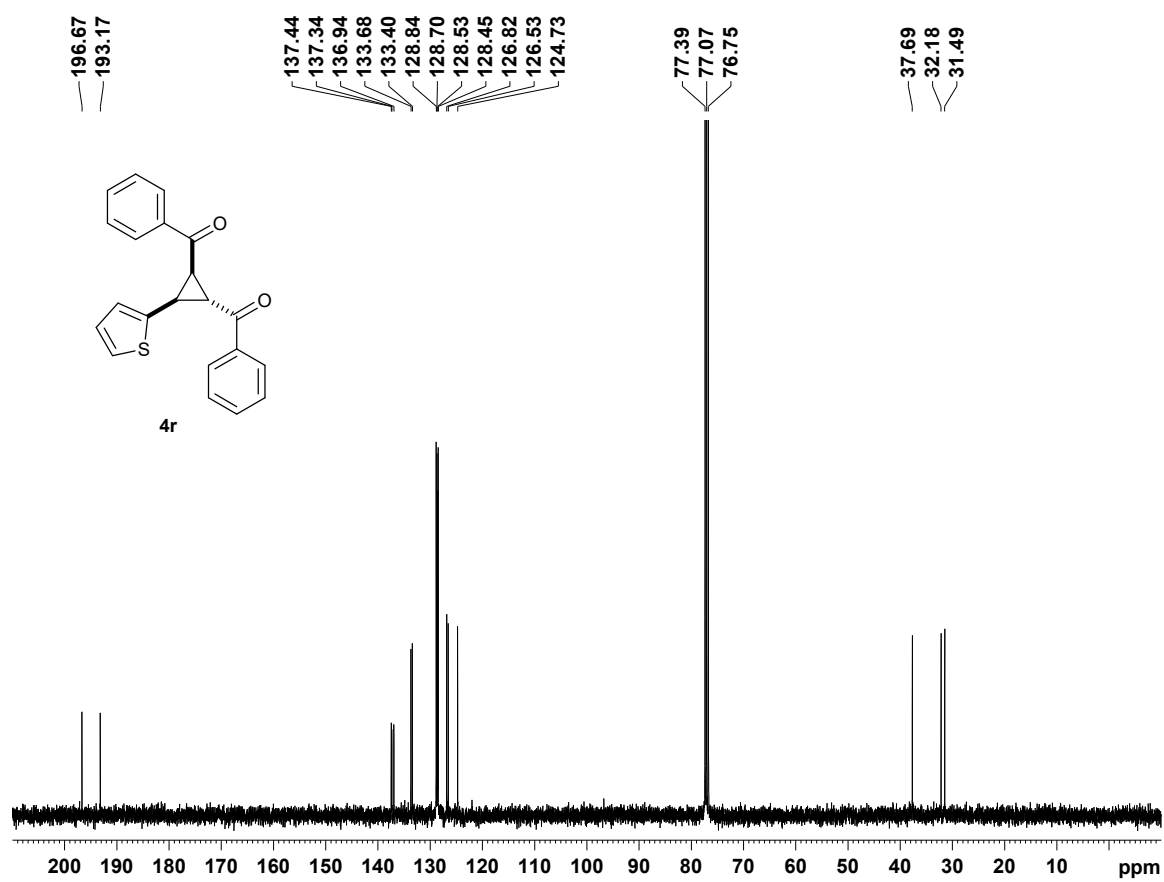

**Figure S50.**  $^{13}\text{C}\{^1\text{H}\}$  NMR (100 MHz,  $\text{CDCl}_3$ ) spectrum of **4r**

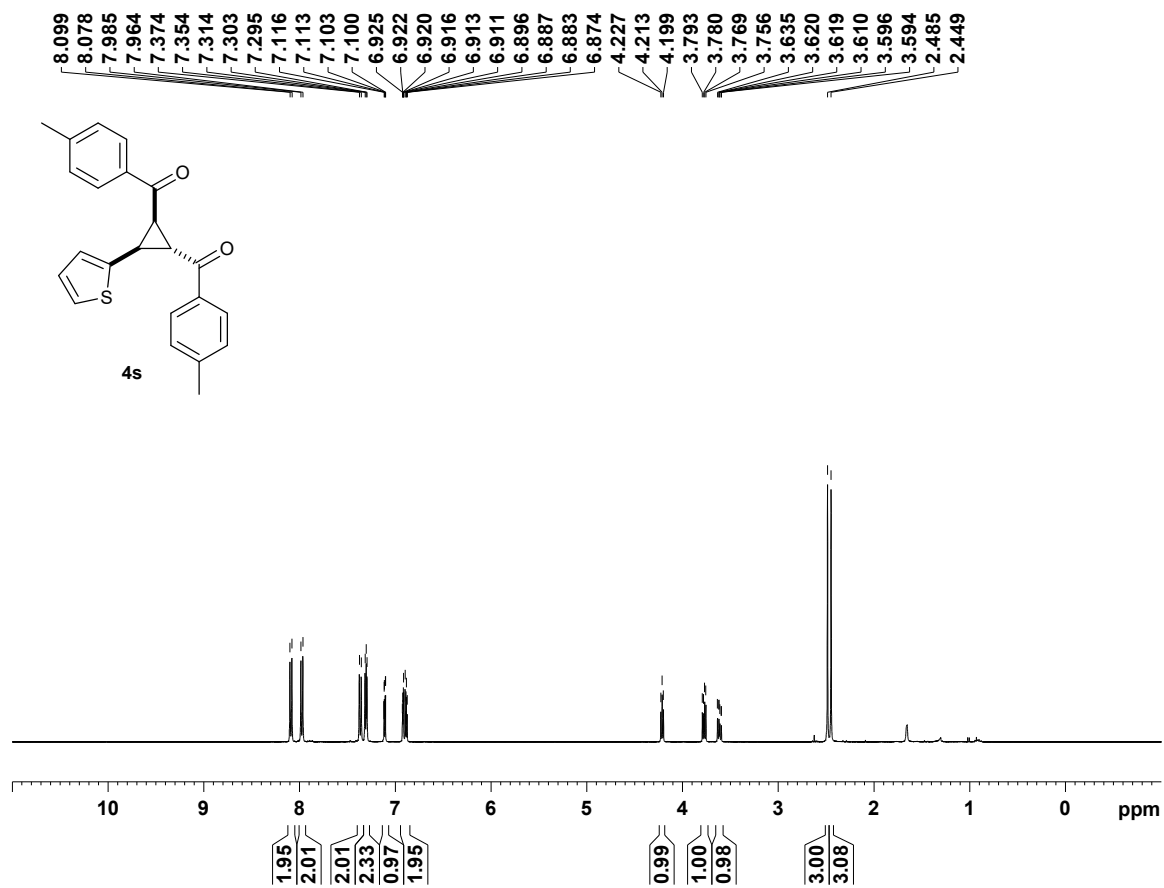

**Figure S51.** <sup>1</sup>H NMR (400 MHz, CDCl<sub>3</sub>) spectrum of **4s**

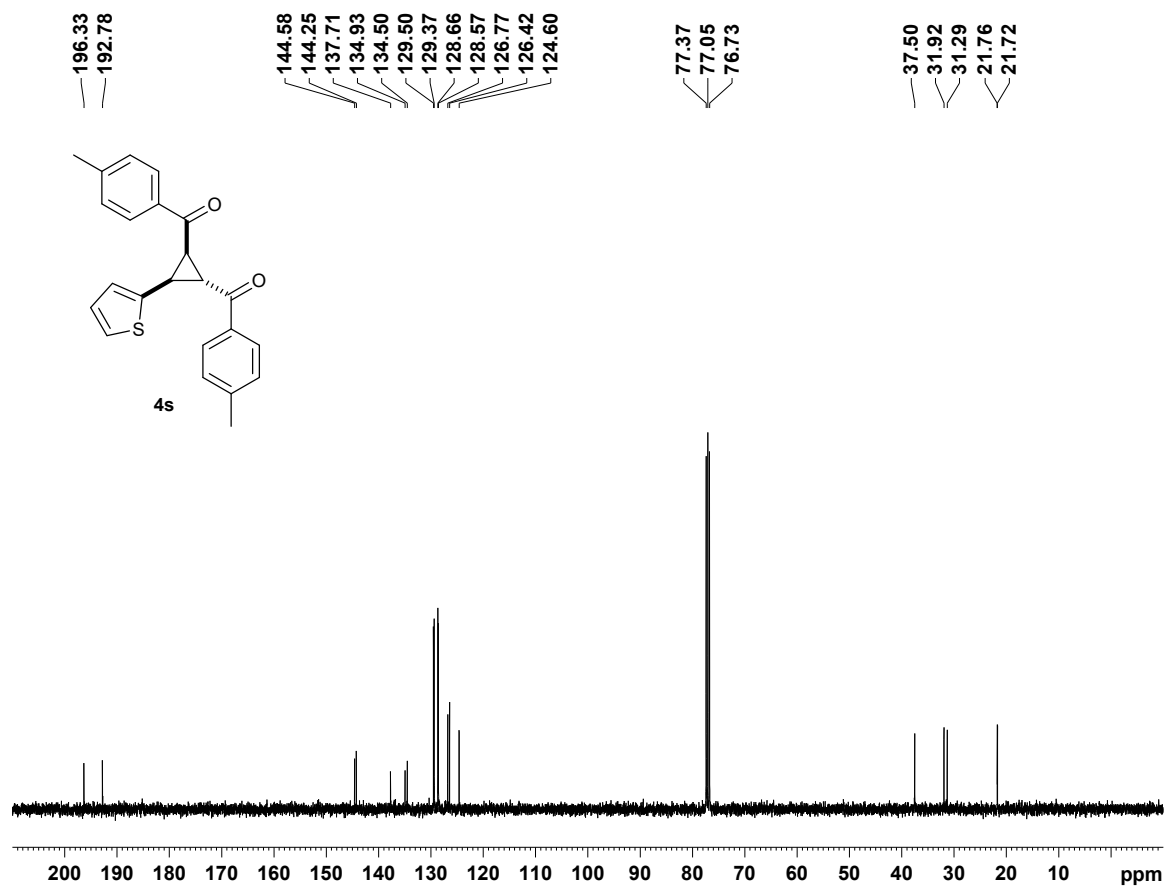

**Figure S52.**  $^{13}\text{C}\{^1\text{H}\}$  NMR (100 MHz,  $\text{CDCl}_3$ ) spectrum of **4s**

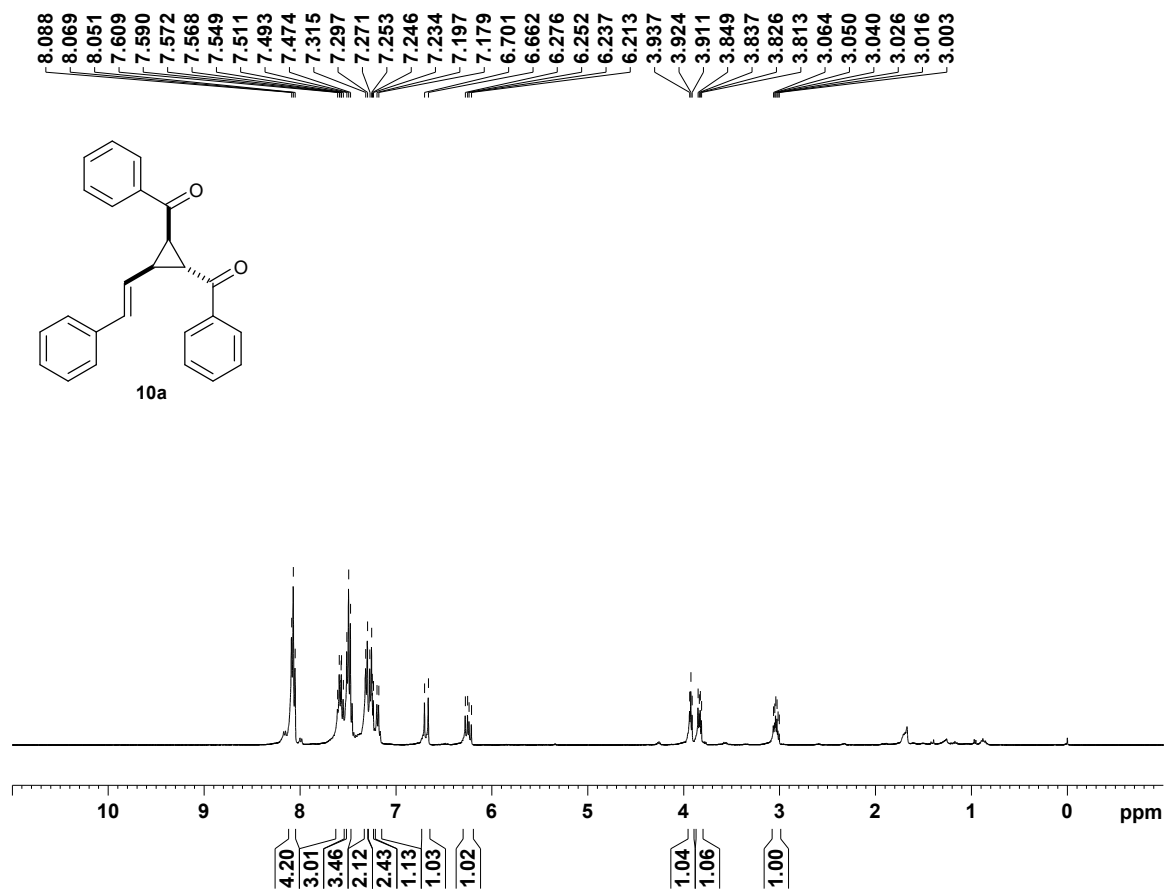

**Figure S53.** <sup>1</sup>H NMR (400 MHz, CDCl<sub>3</sub>) spectrum of **10a**

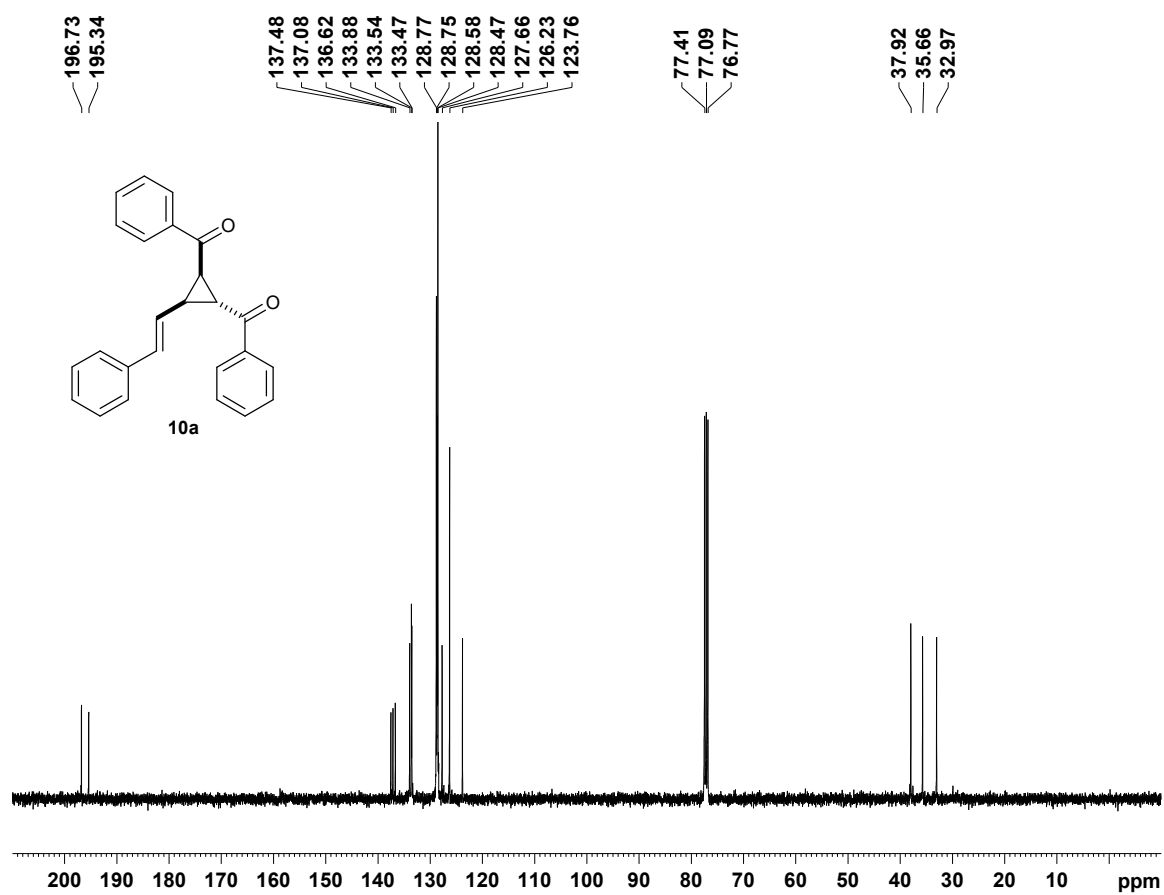

Figure S54.  $^{13}\text{C}\{^1\text{H}\}$  NMR (100 MHz,  $\text{CDCl}_3$ ) spectrum of **10a**

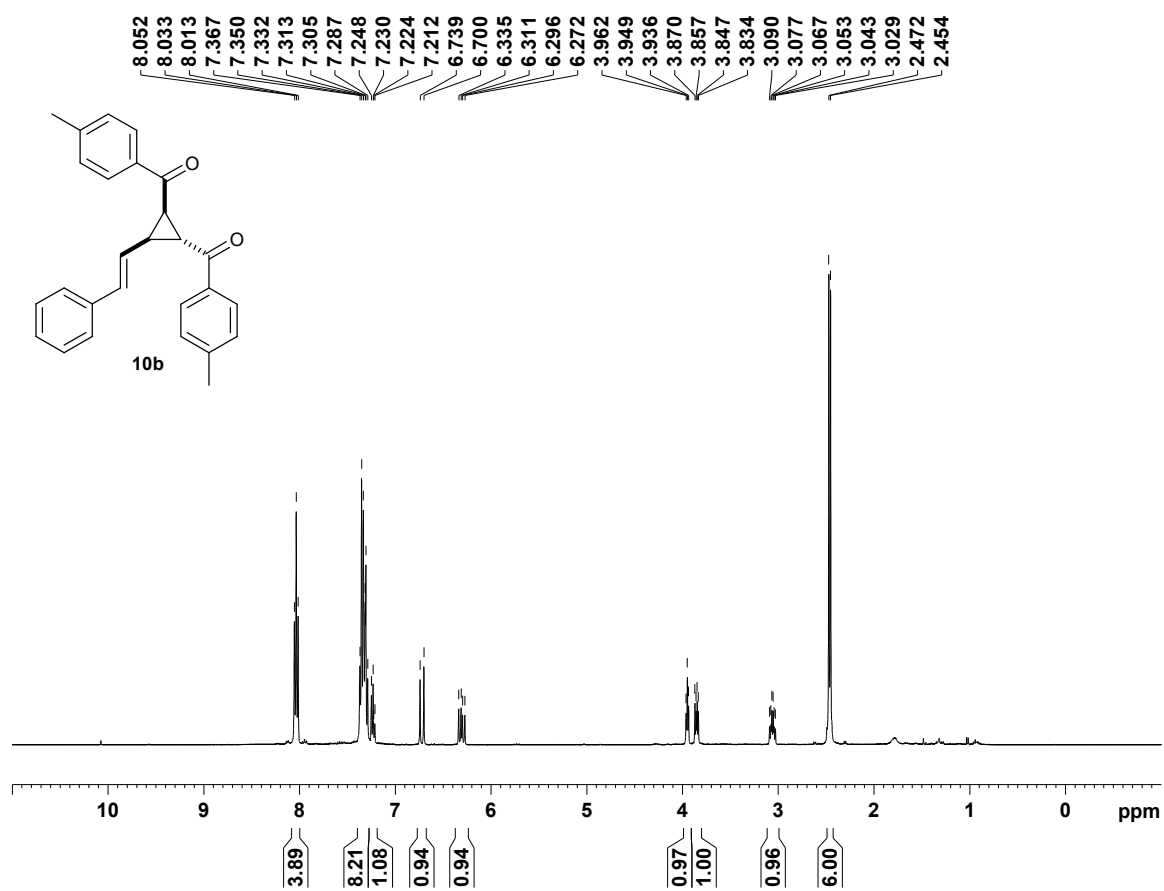

**Figure S55.** <sup>1</sup>H NMR (400 MHz, CDCl<sub>3</sub>) spectrum of **10b**



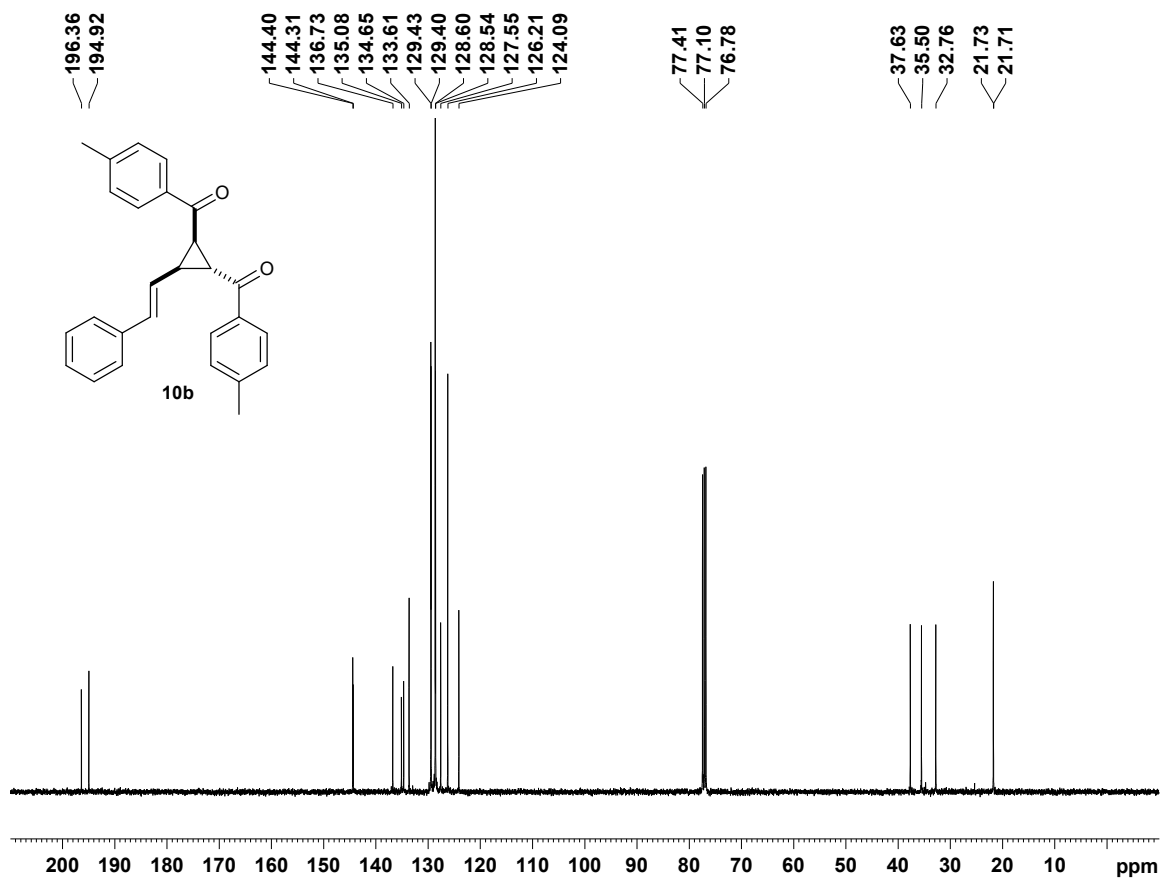

**Figure S56.**  $^{13}\text{C}\{^1\text{H}\}$  NMR (100 MHz,  $\text{CDCl}_3$ ) spectrum of **10b**

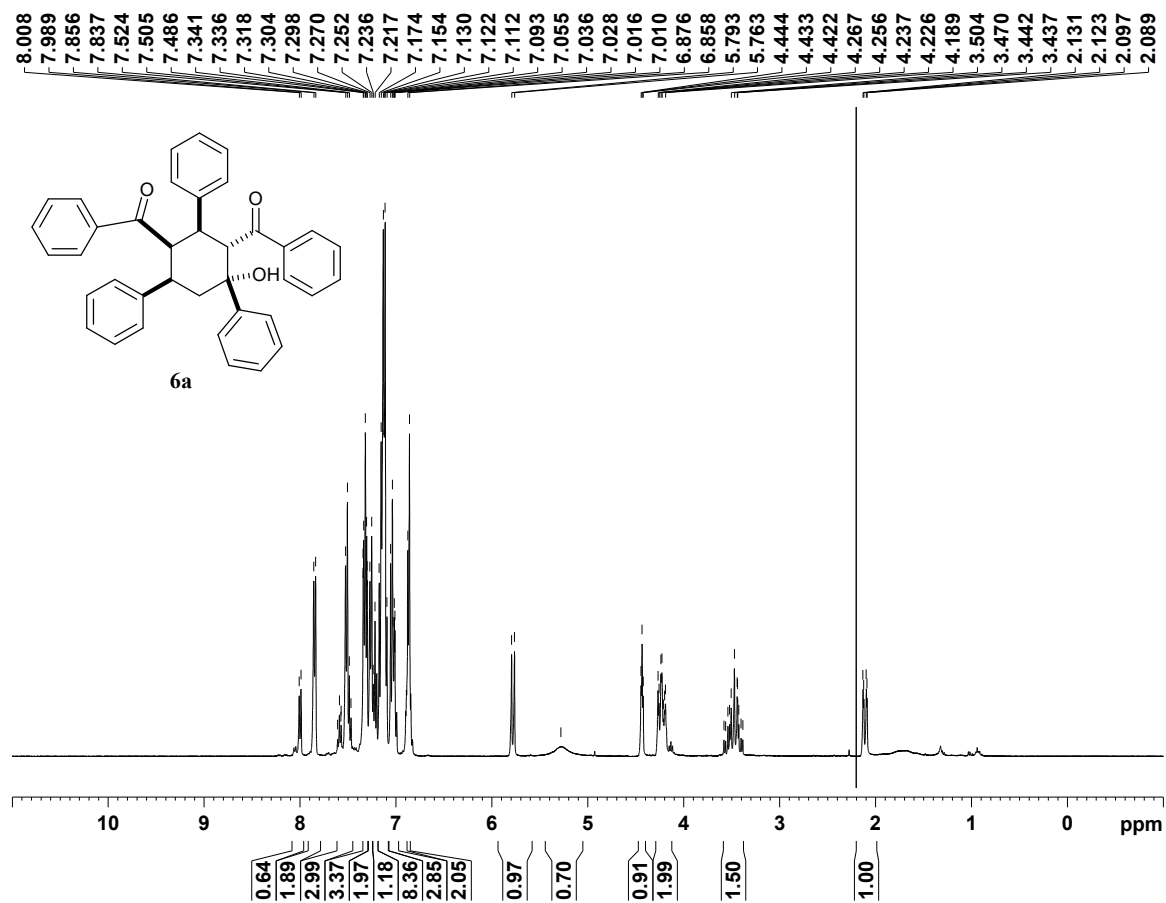

Figure S57.  $^1\text{H}$  NMR (400 MHz,  $\text{CDCl}_3$ ) spectrum of **6a**

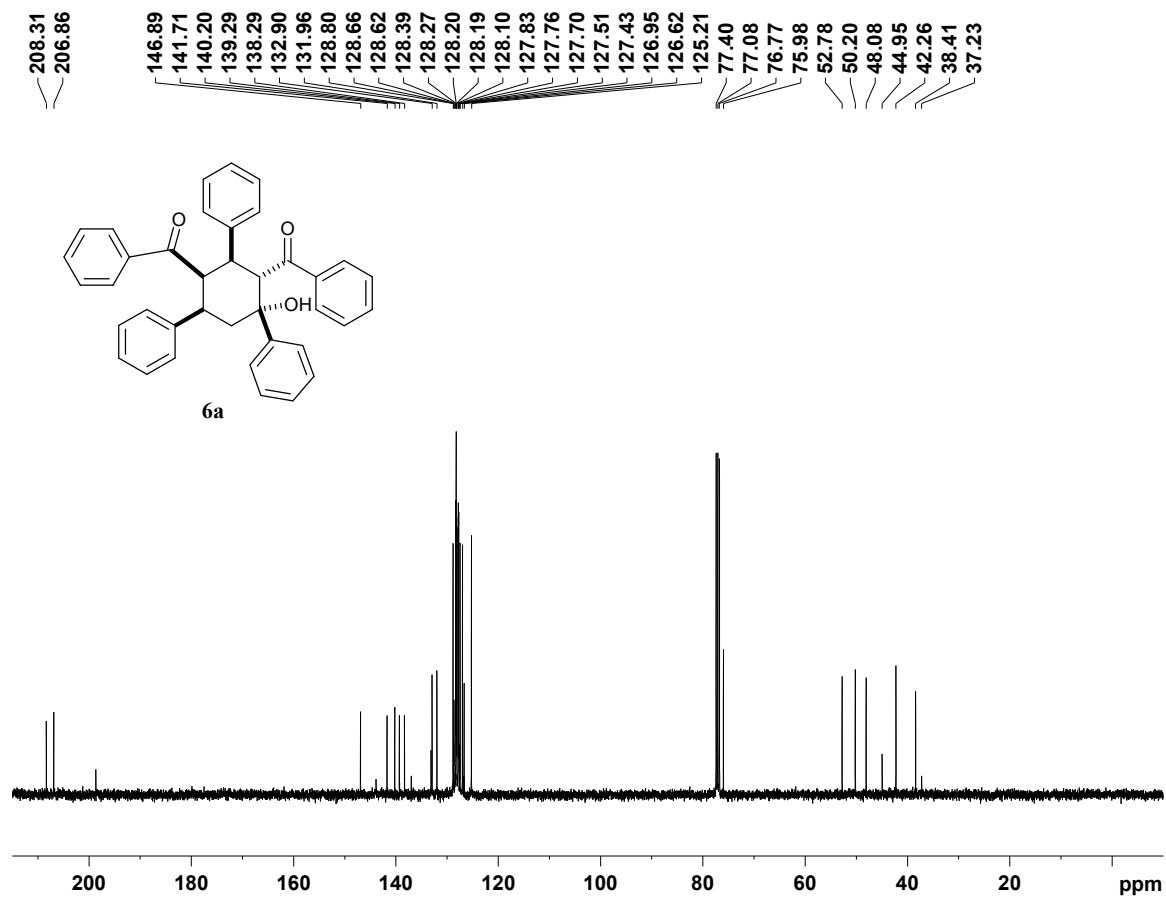

**Figure S58.**  $^{13}\text{C}\{^1\text{H}\}$  NMR (100 MHz,  $\text{CDCl}_3$ ) spectrum of **6a**

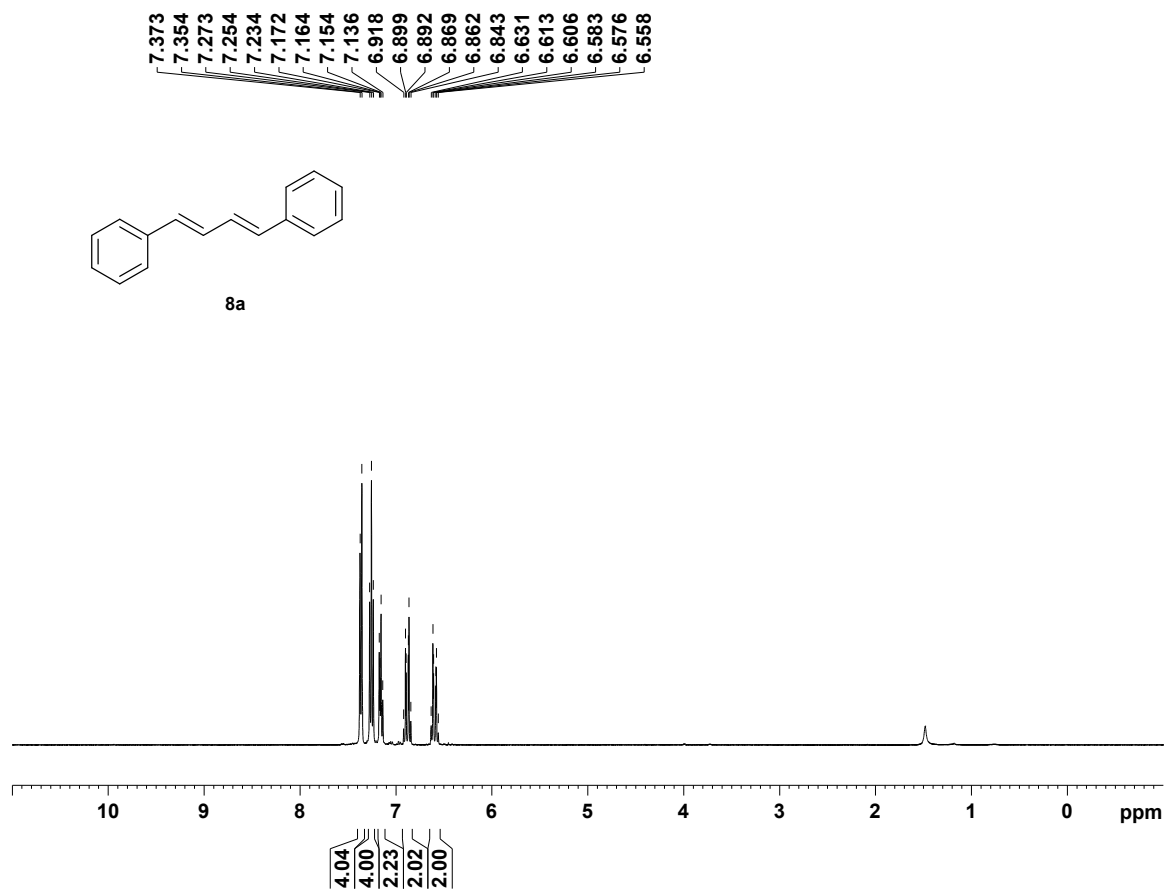

Figure S59. <sup>1</sup>H NMR (400 MHz, CDCl<sub>3</sub>) spectrum of **8a**

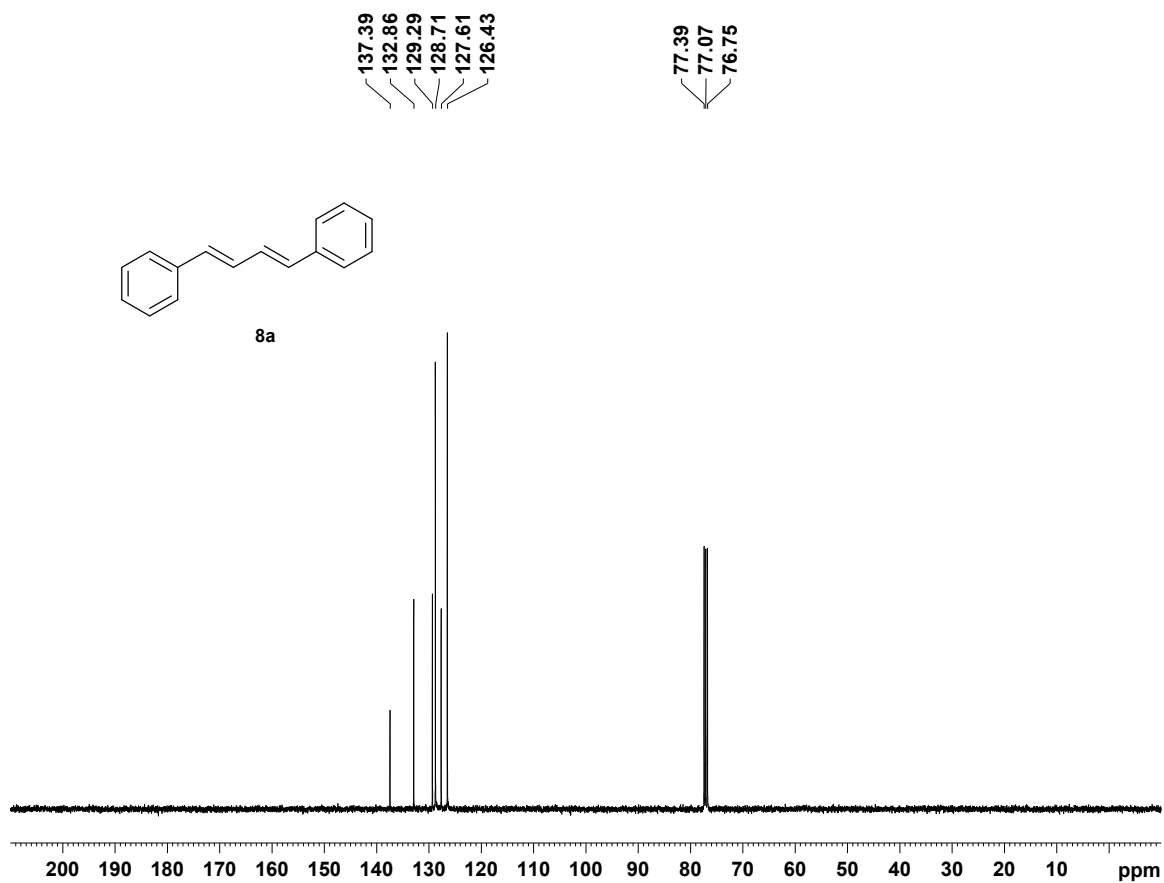

Figure S60.  $^{13}\text{C}\{^1\text{H}\}$  NMR (100 MHz,  $\text{CDCl}_3$ ) spectrum of **8a**

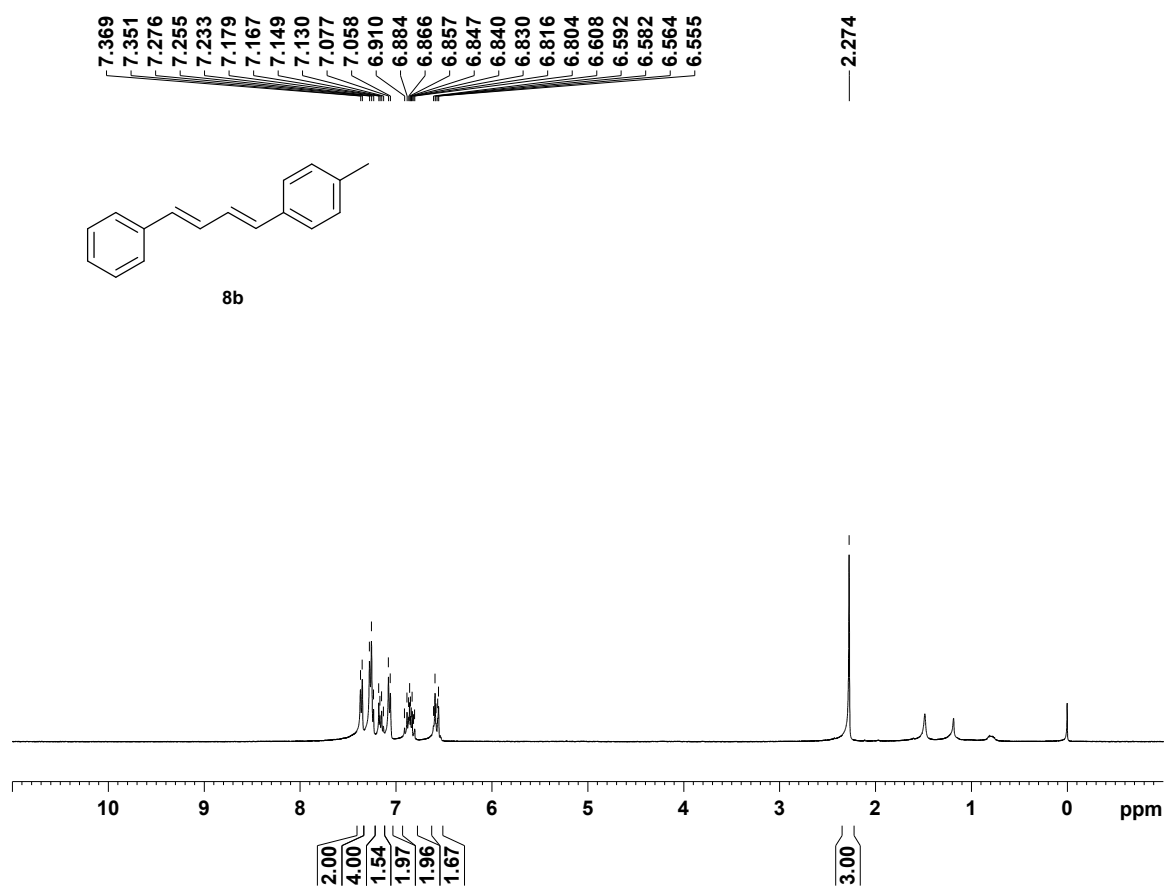

Figure S61. <sup>1</sup>H NMR (400 MHz, CDCl<sub>3</sub>) spectrum of **8b**

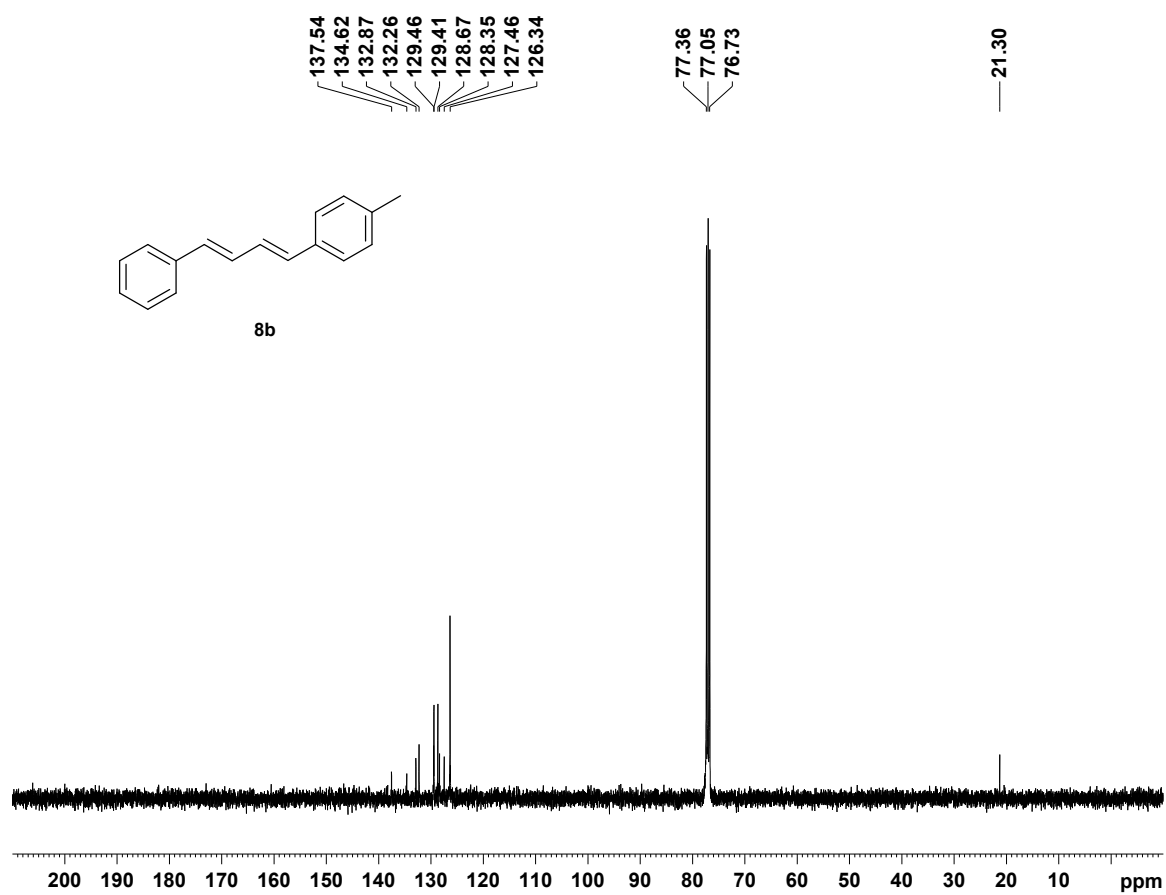

**Figure S62.**  $^{13}\text{C}\{^1\text{H}\}$  NMR (100 MHz,  $\text{CDCl}_3$ ) spectrum of **8b**

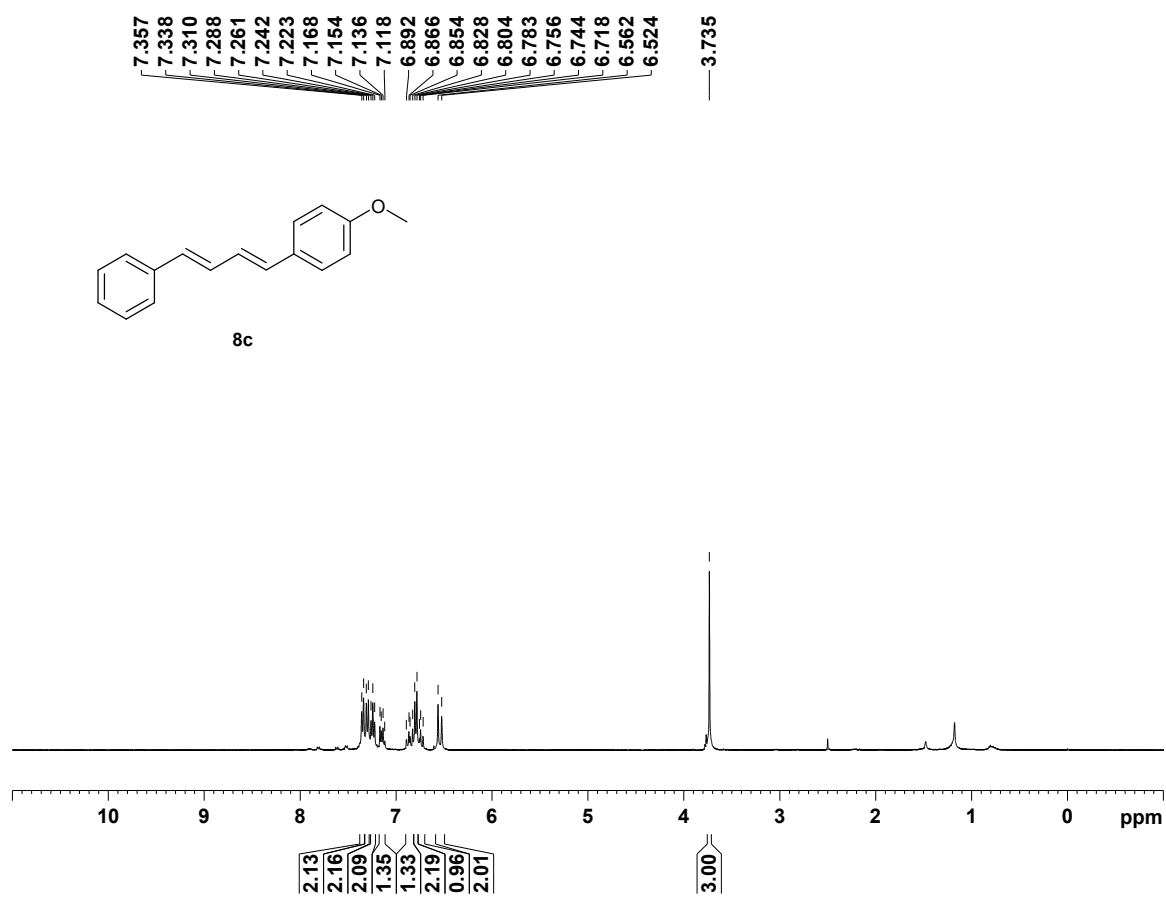

Figure S63. <sup>1</sup>H NMR (400 MHz, CDCl<sub>3</sub>) spectrum of **8c**



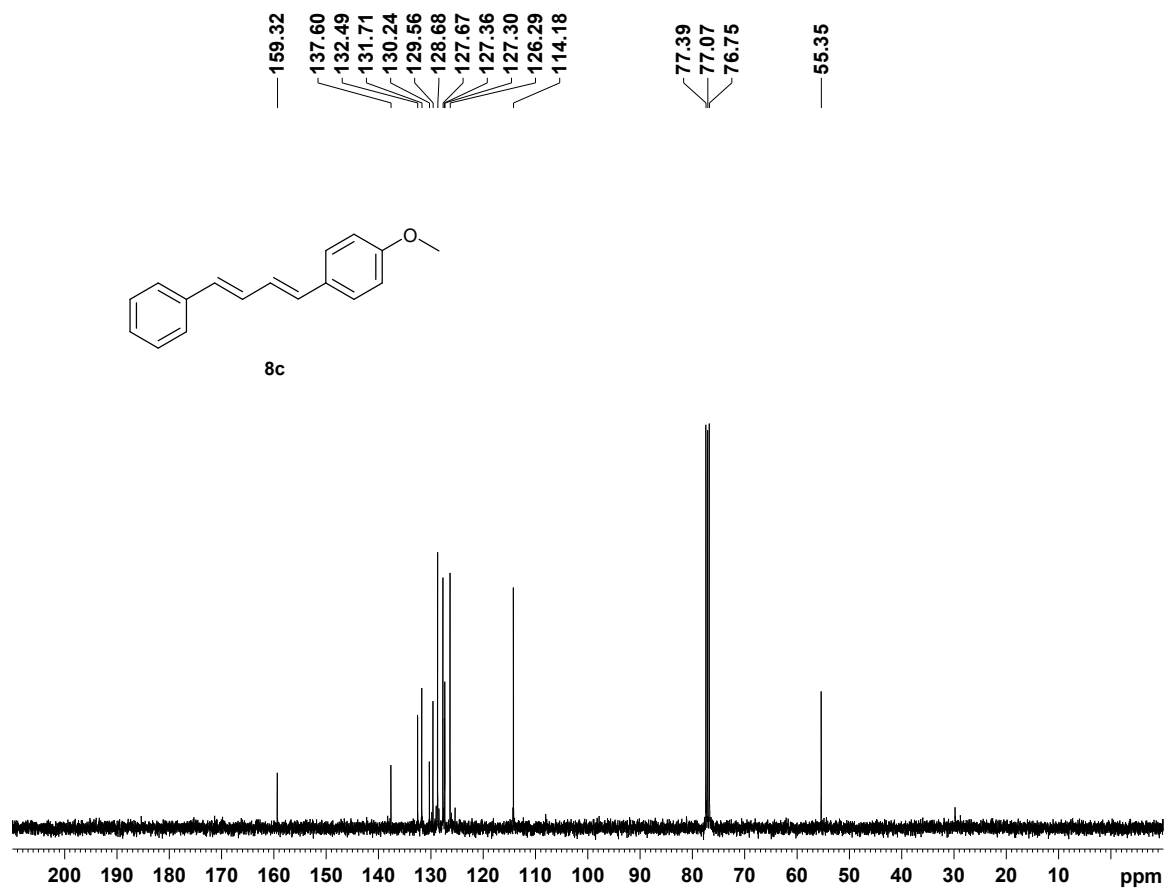

**Figure S64.**  $^{13}\text{C}\{^1\text{H}\}$  NMR (100 MHz,  $\text{CDCl}_3$ ) spectrum of **8c**

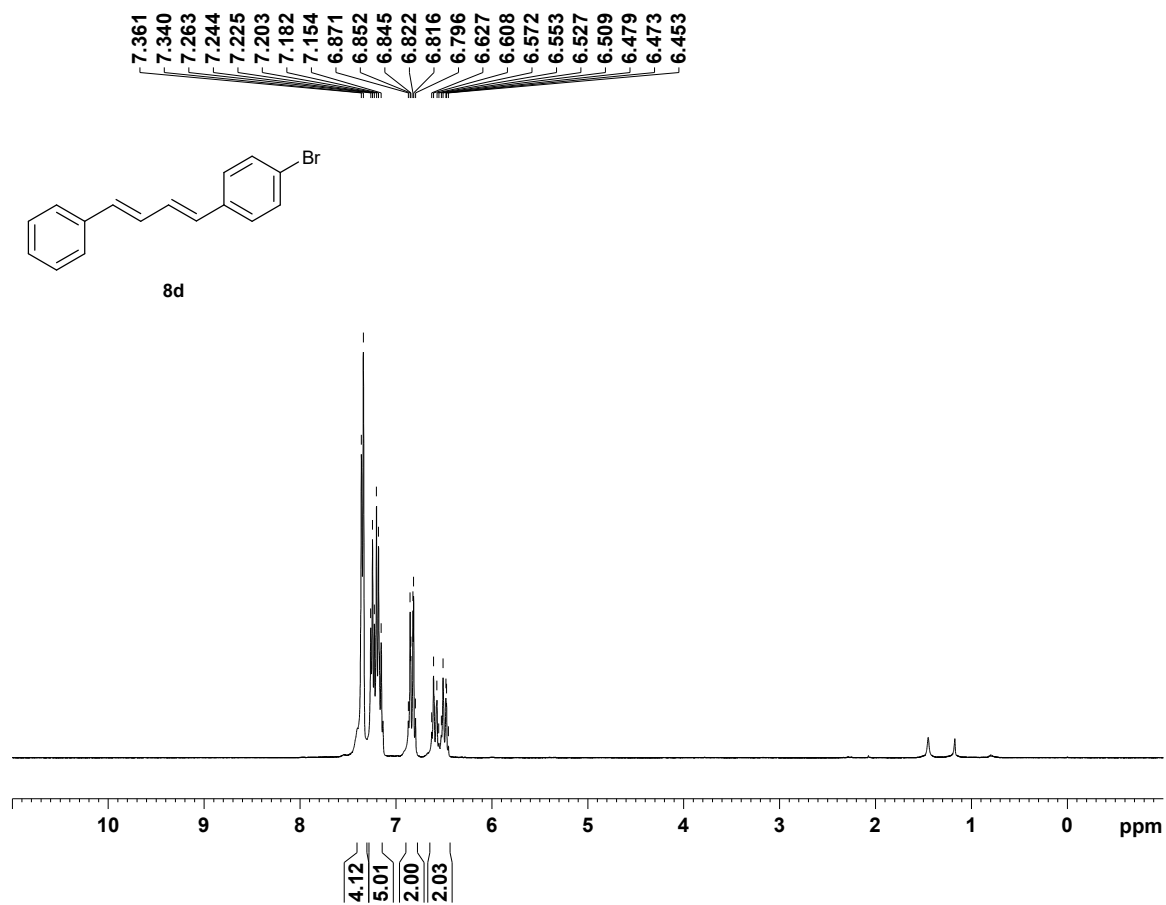

Figure S65. <sup>1</sup>H NMR (400 MHz, CDCl<sub>3</sub>) spectrum of **8d**

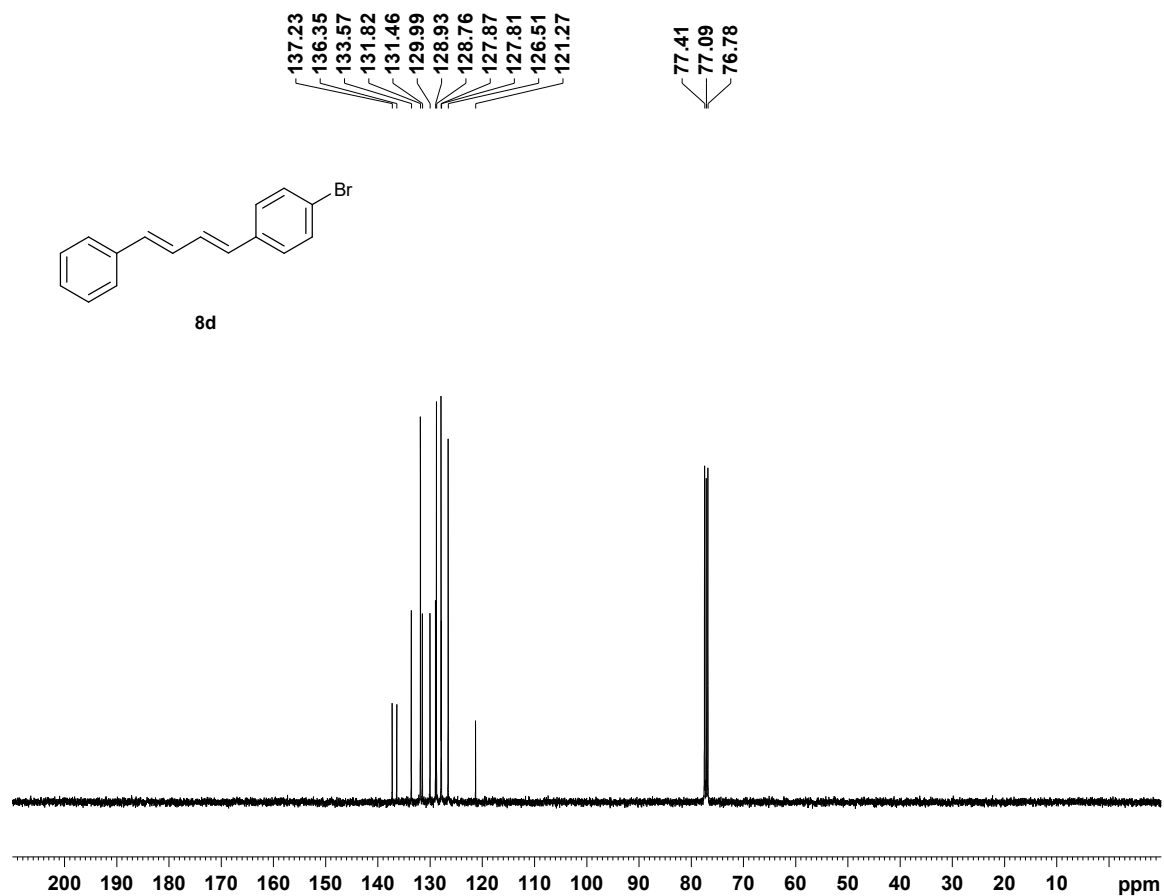

**Figure S66.**  $^{13}\text{C}\{^1\text{H}\}$  NMR (100 MHz,  $\text{CDCl}_3$ ) spectrum of **8d**

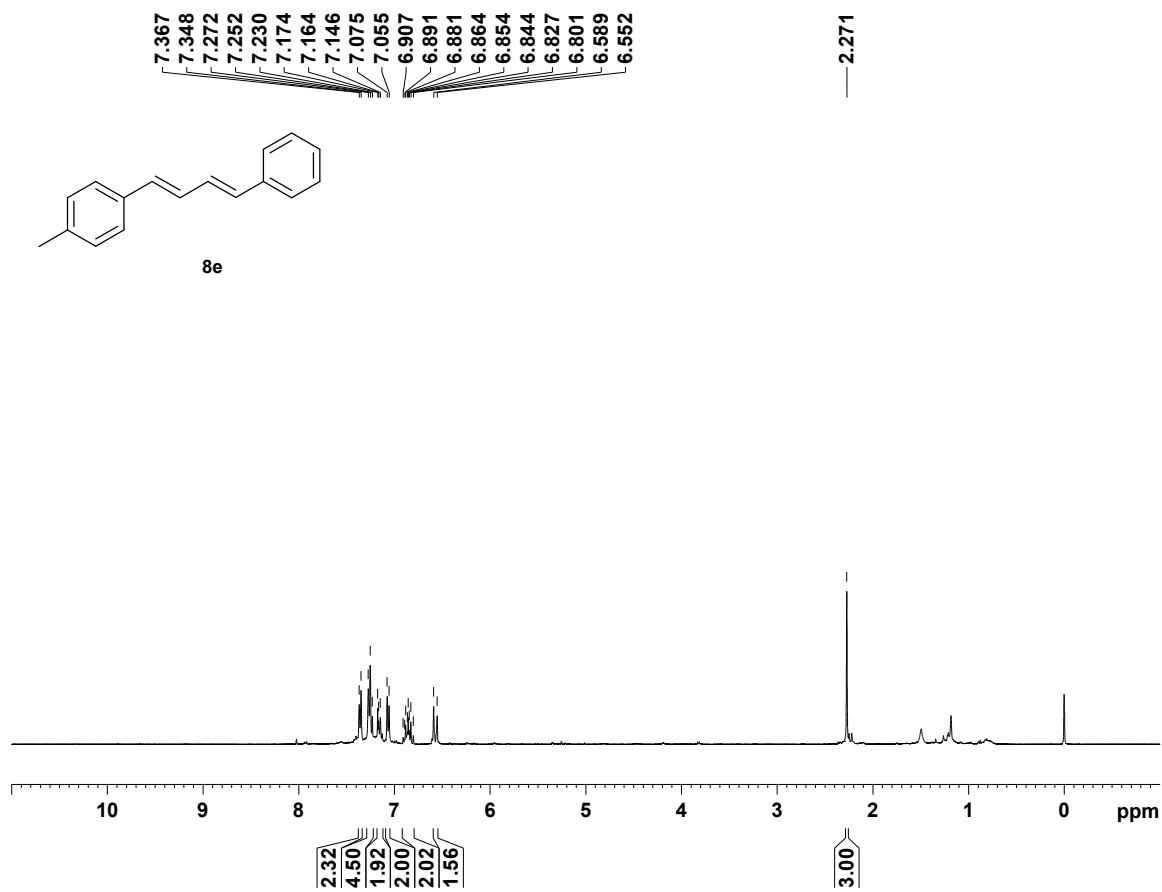

Figure S67.  $^1\text{H}$  NMR (400 MHz,  $\text{CDCl}_3$ ) spectrum of **8e**

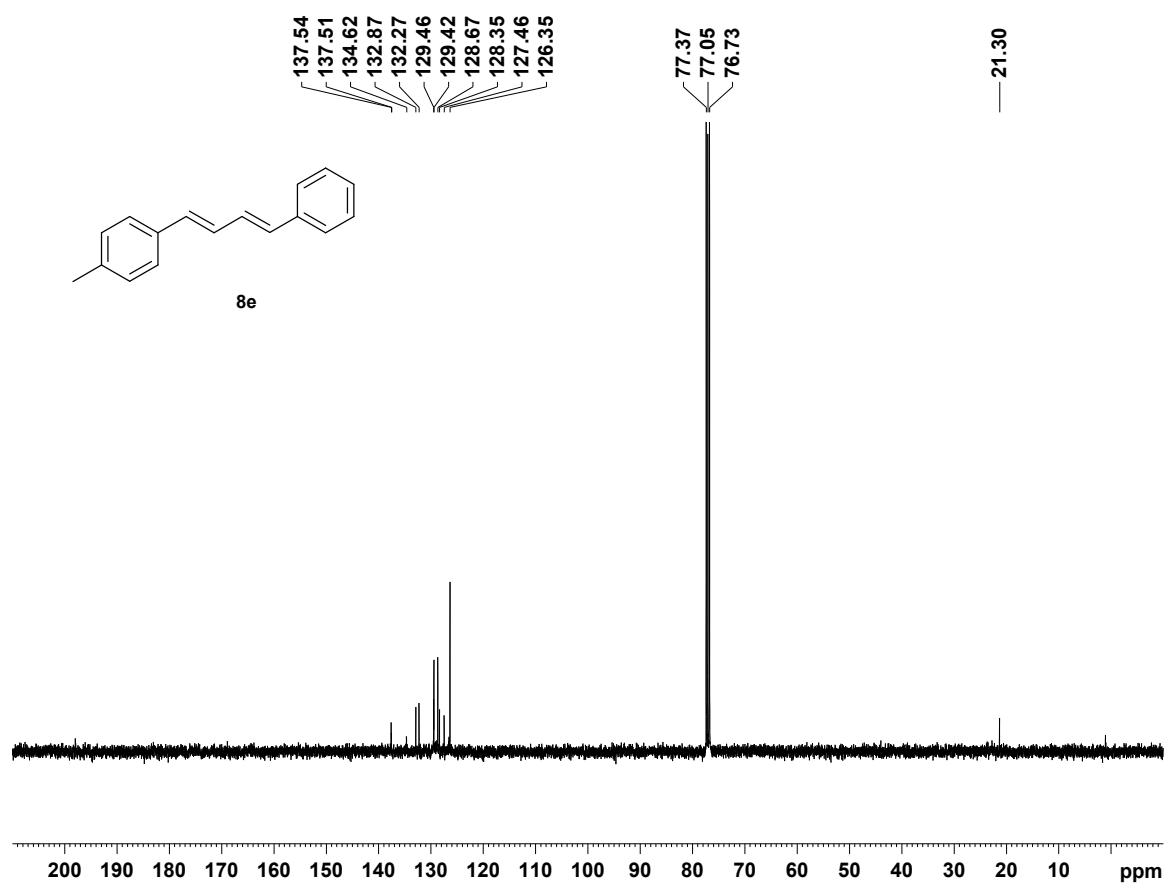

**Figure S68.**  $^{13}\text{C}\{^1\text{H}\}$  NMR (100 MHz,  $\text{CDCl}_3$ ) spectrum of **8e**

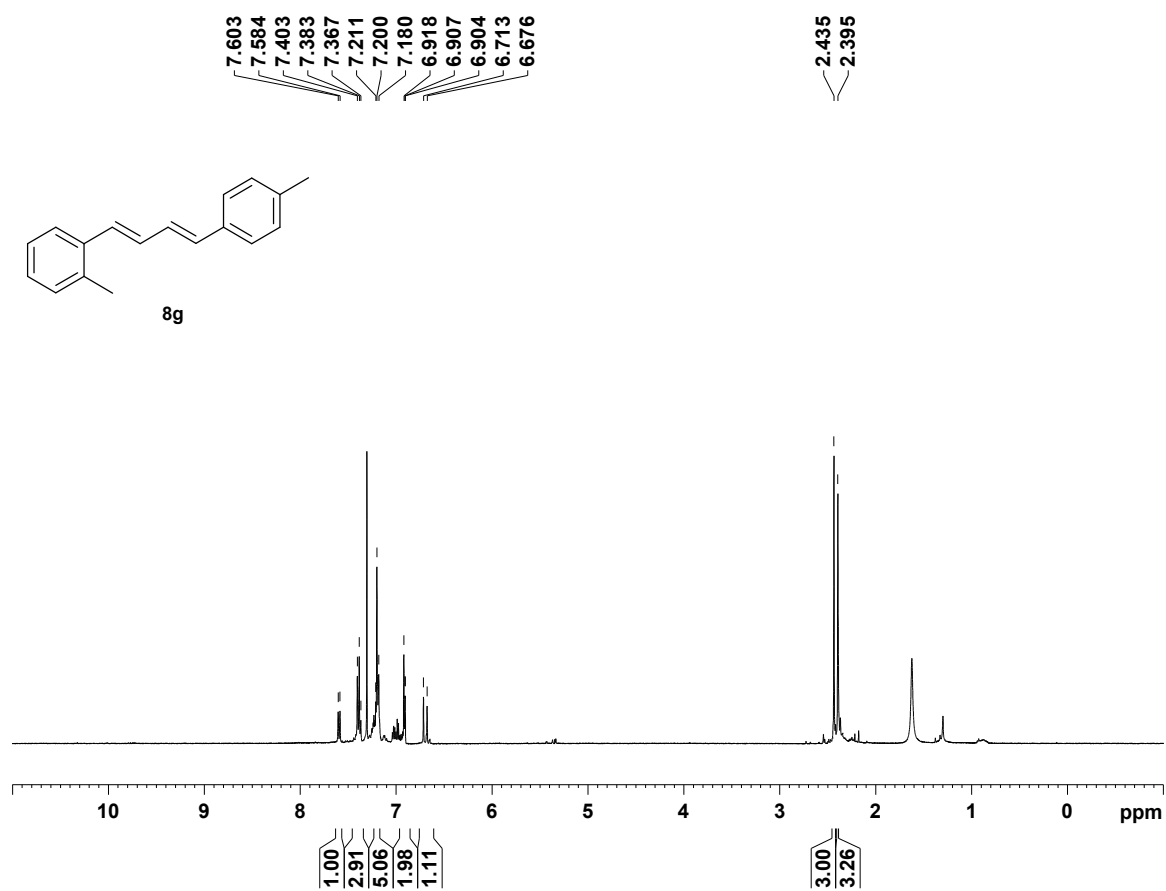

Figure S69. <sup>1</sup>H NMR (400 MHz, CDCl<sub>3</sub>) spectrum of **8g**

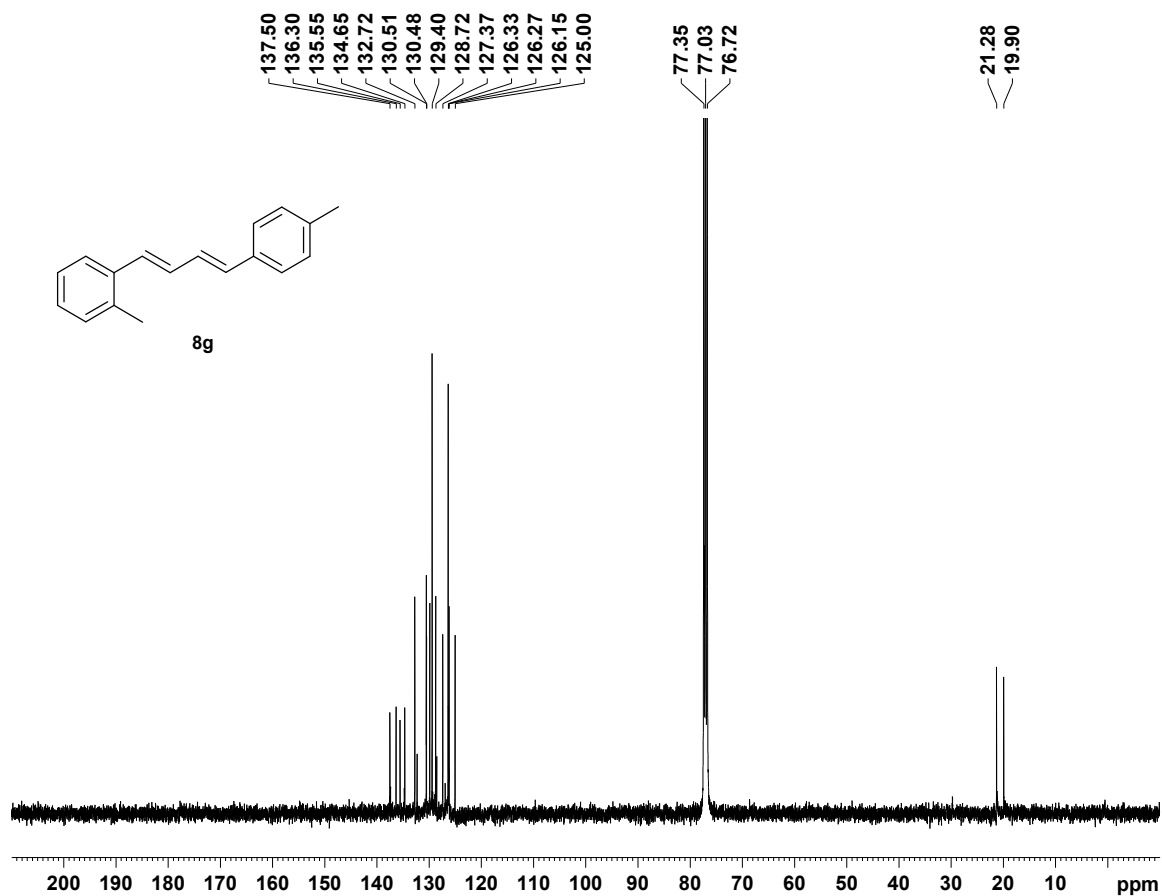

**Figure S70.**  $^{13}\text{C}\{^1\text{H}\}$  NMR (100 MHz,  $\text{CDCl}_3$ ) spectrum of **8g**

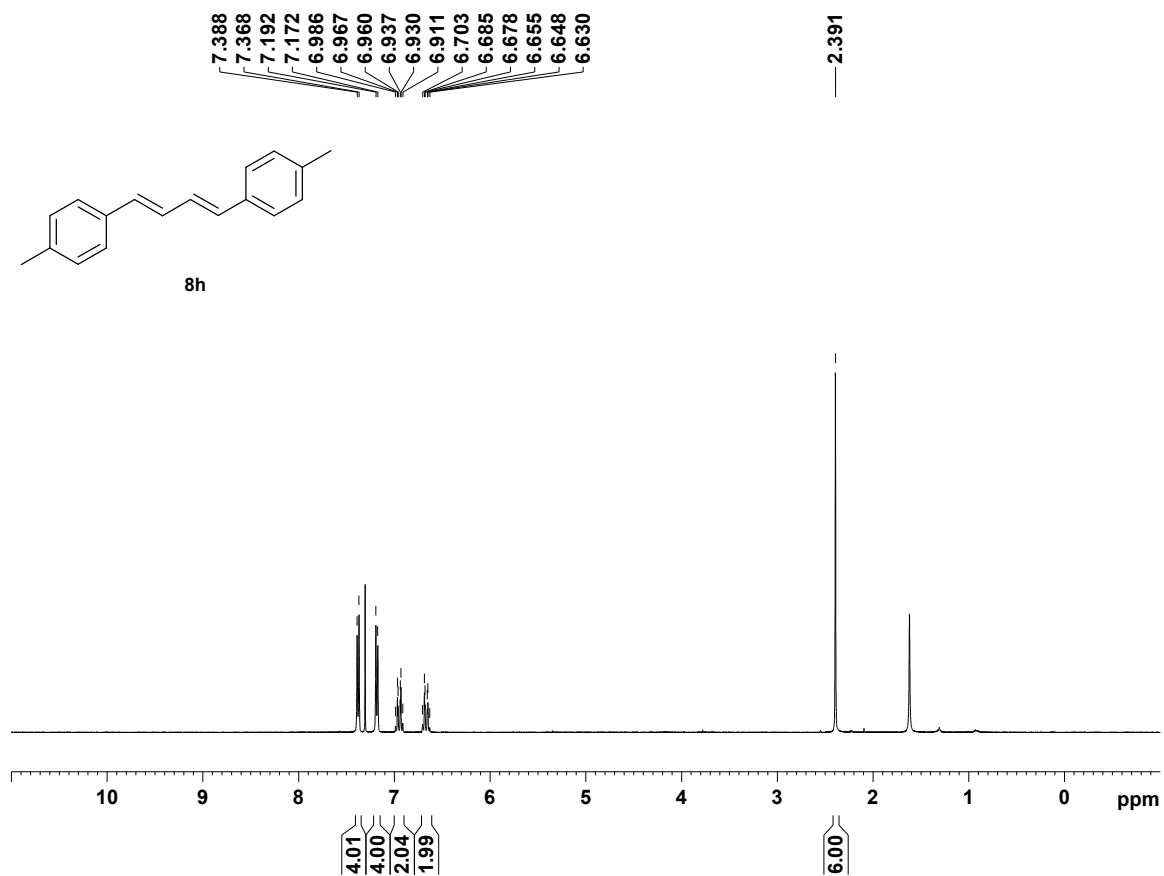

**Figure S71.** <sup>1</sup>H NMR (400 MHz, CDCl<sub>3</sub>) spectrum of **8h**



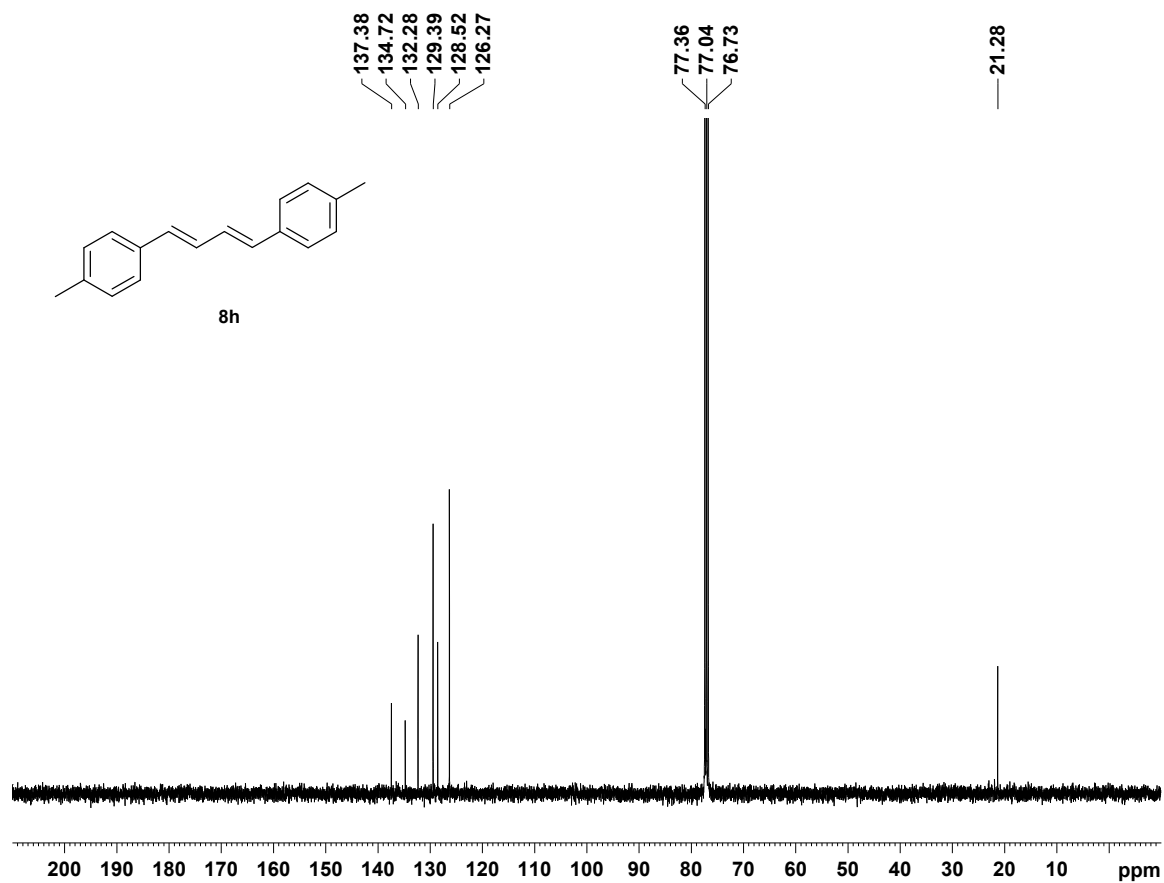

**Figure S72.**  $^{13}\text{C}\{^1\text{H}\}$  NMR (100 MHz,  $\text{CDCl}_3$ ) spectrum of **8h**

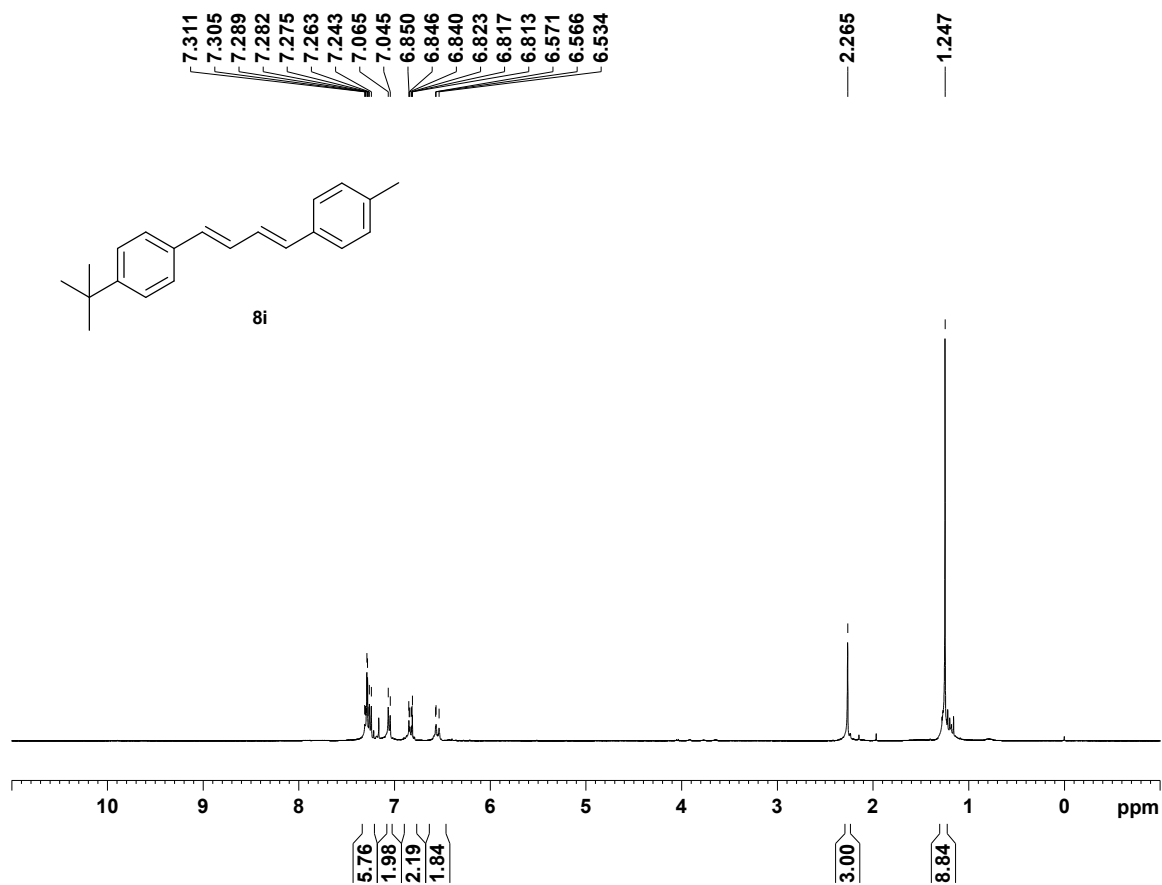

Figure S73. <sup>1</sup>H NMR (400 MHz, CDCl<sub>3</sub>) spectrum of **8i**

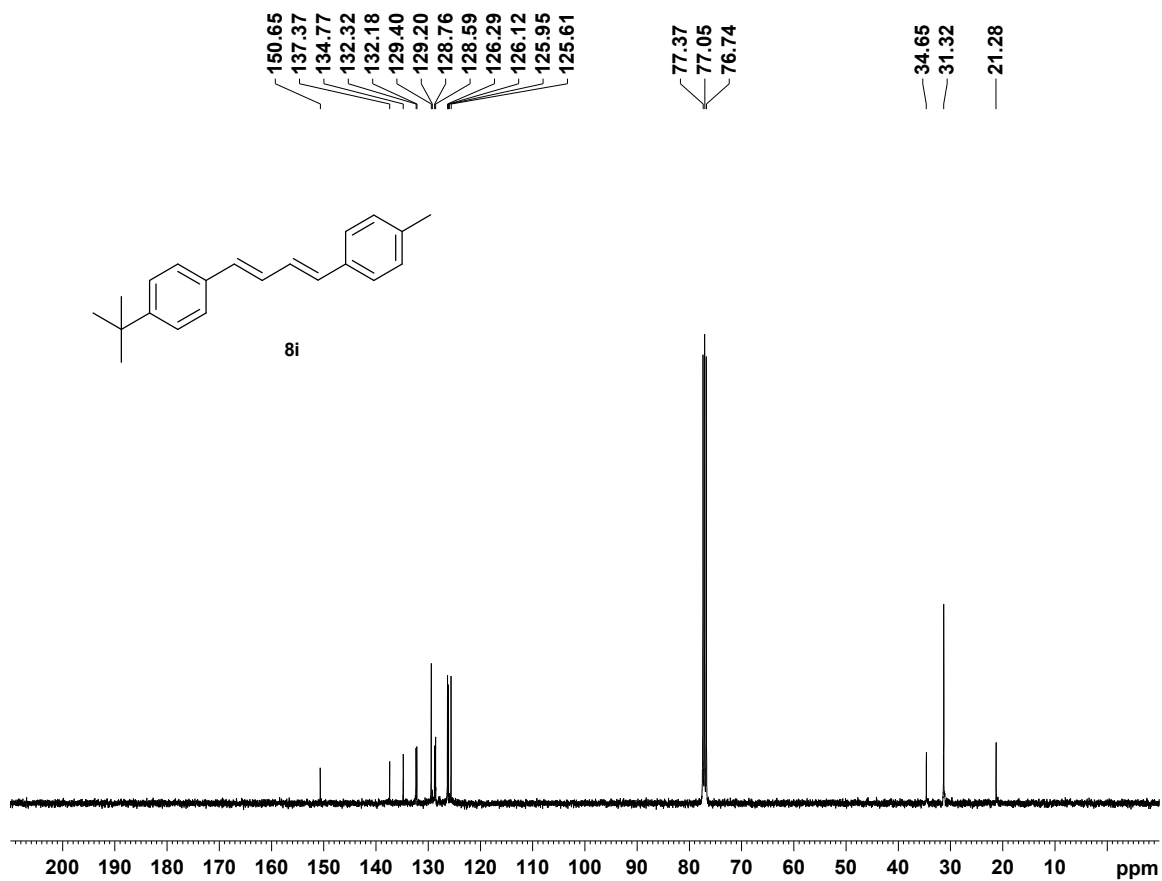

**Figure S74.**  $^{13}\text{C}\{^1\text{H}\}$  NMR (100 MHz,  $\text{CDCl}_3$ ) spectrum of **8i**

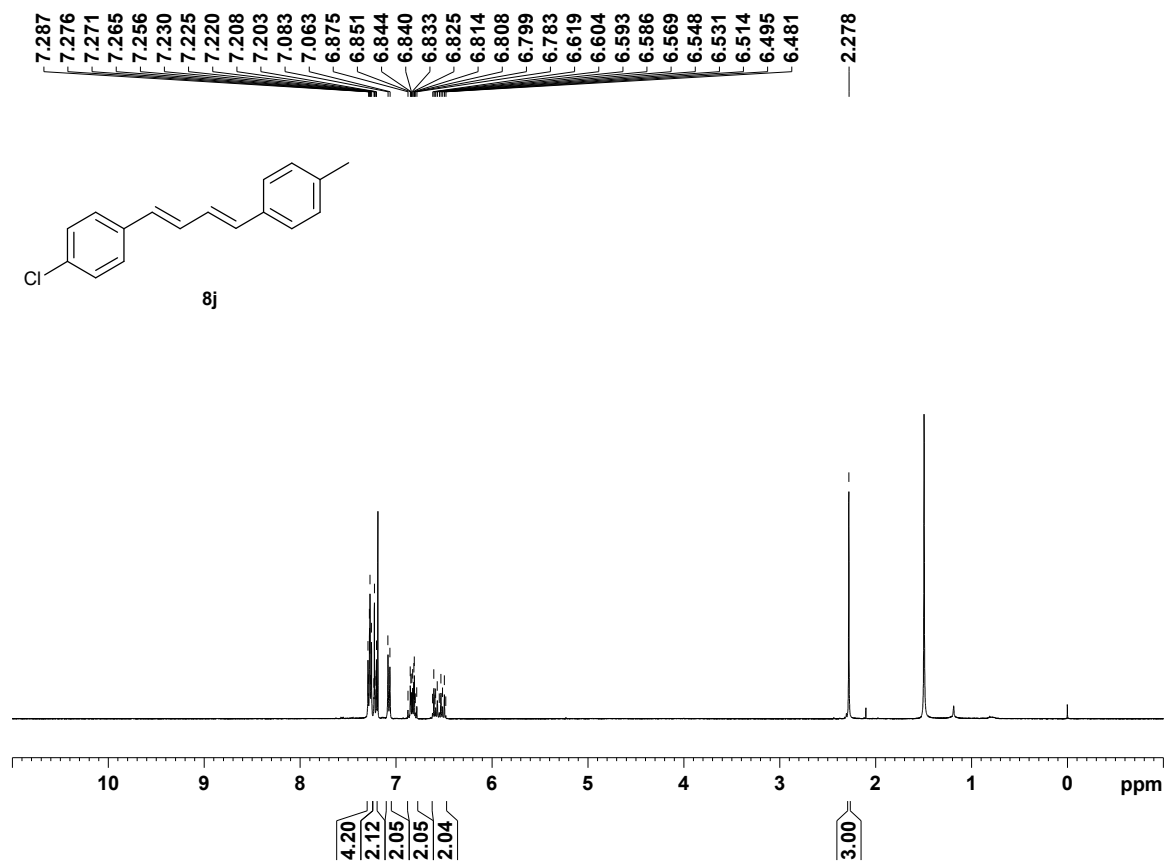

Figure S75. <sup>1</sup>H NMR (400 MHz, CDCl<sub>3</sub>) spectrum of **8j**

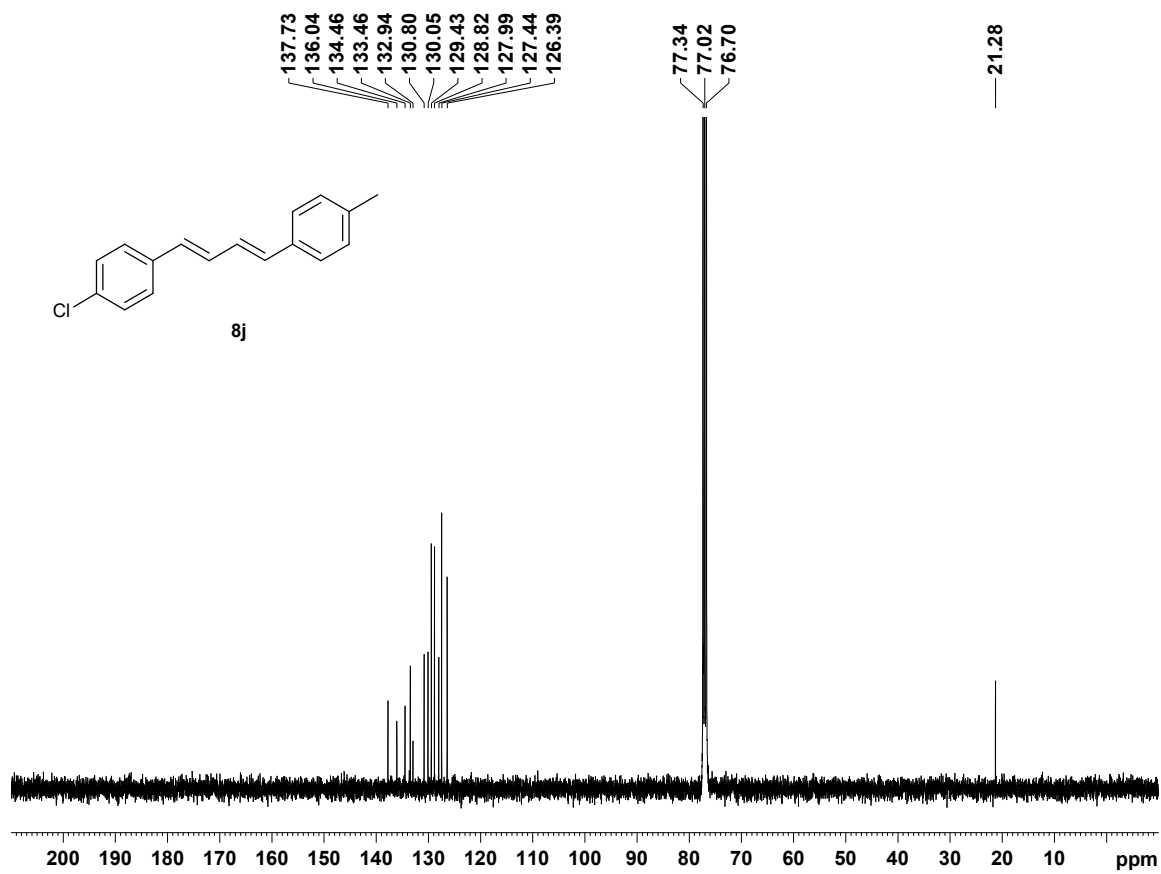

Figure S76.  $^{13}\text{C}\{^1\text{H}\}$  NMR (100 MHz,  $\text{CDCl}_3$ ) spectrum of **8j**

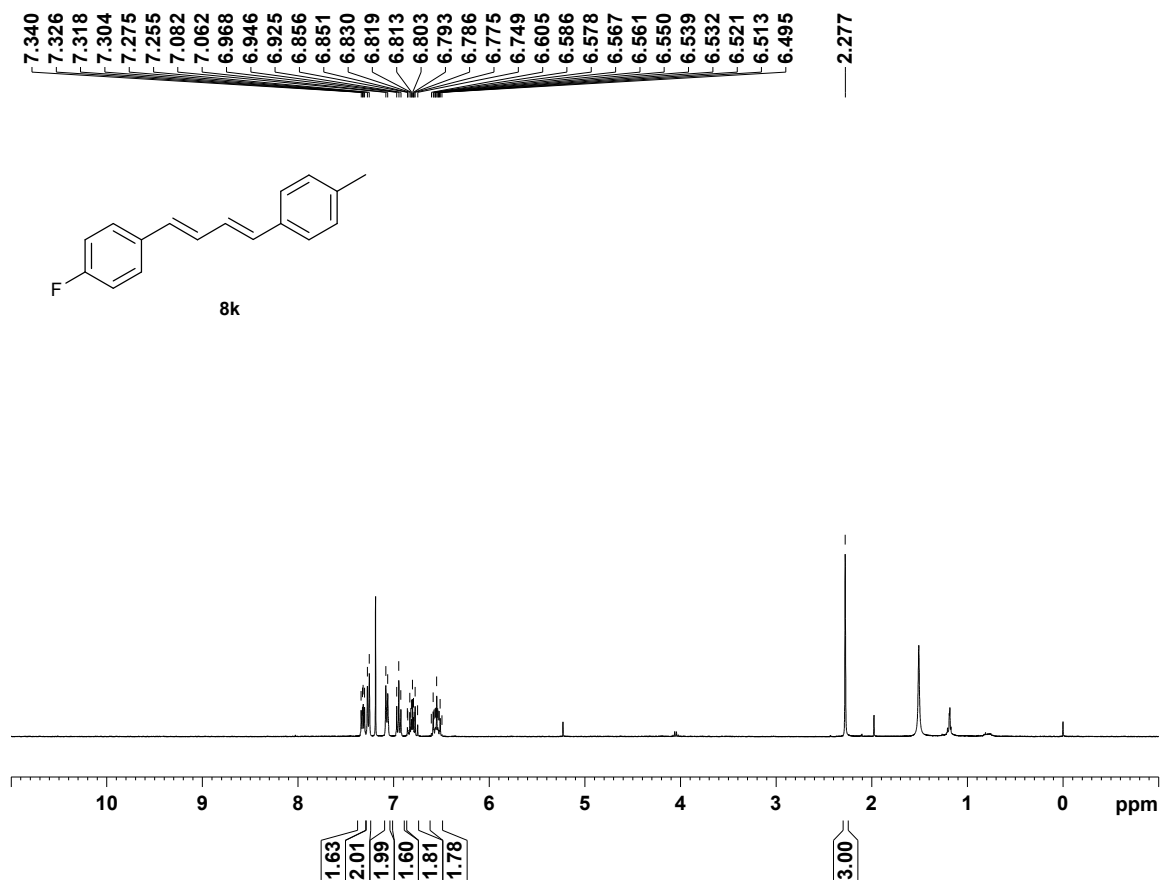

Figure S77. <sup>1</sup>H NMR (400 MHz, CDCl<sub>3</sub>) spectrum of **8k**

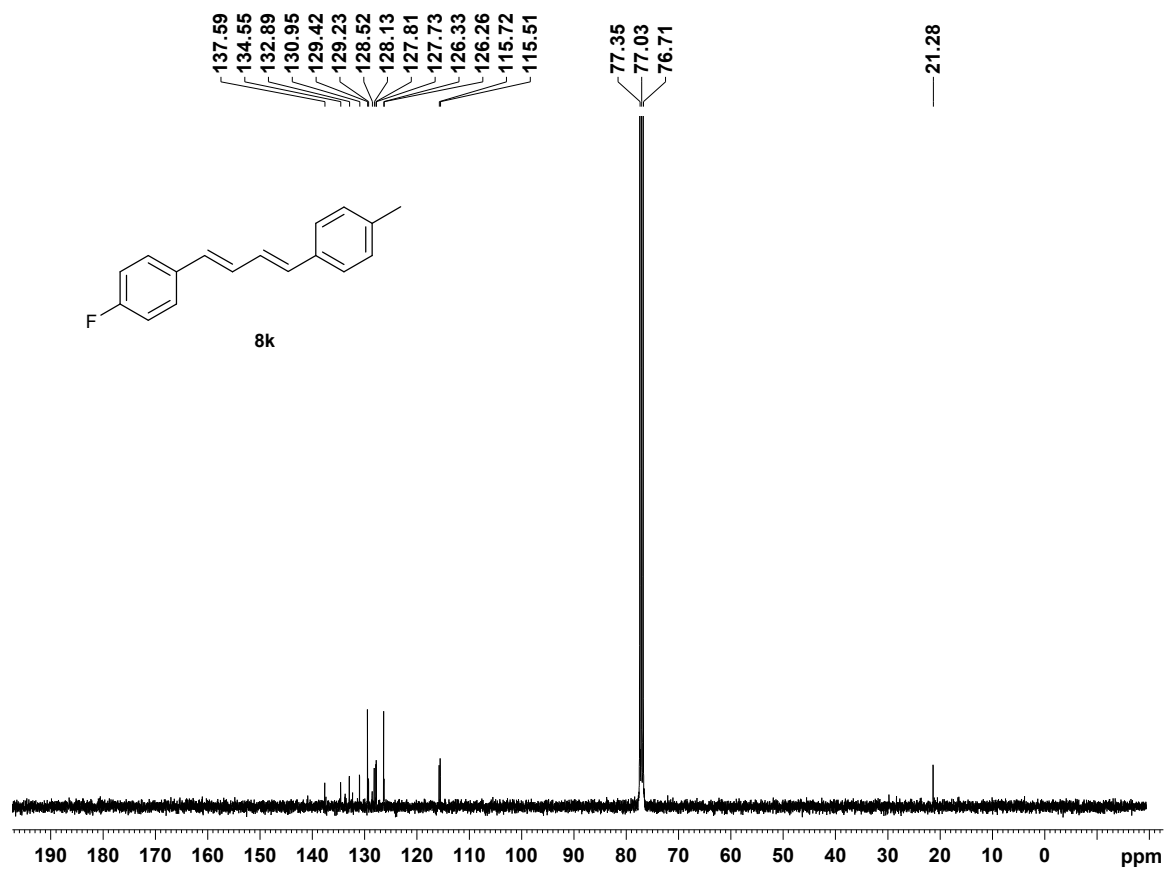

**Figure S78.**  $^{13}\text{C}\{^1\text{H}\}$  NMR (100 MHz,  $\text{CDCl}_3$ ) spectrum of **8k**

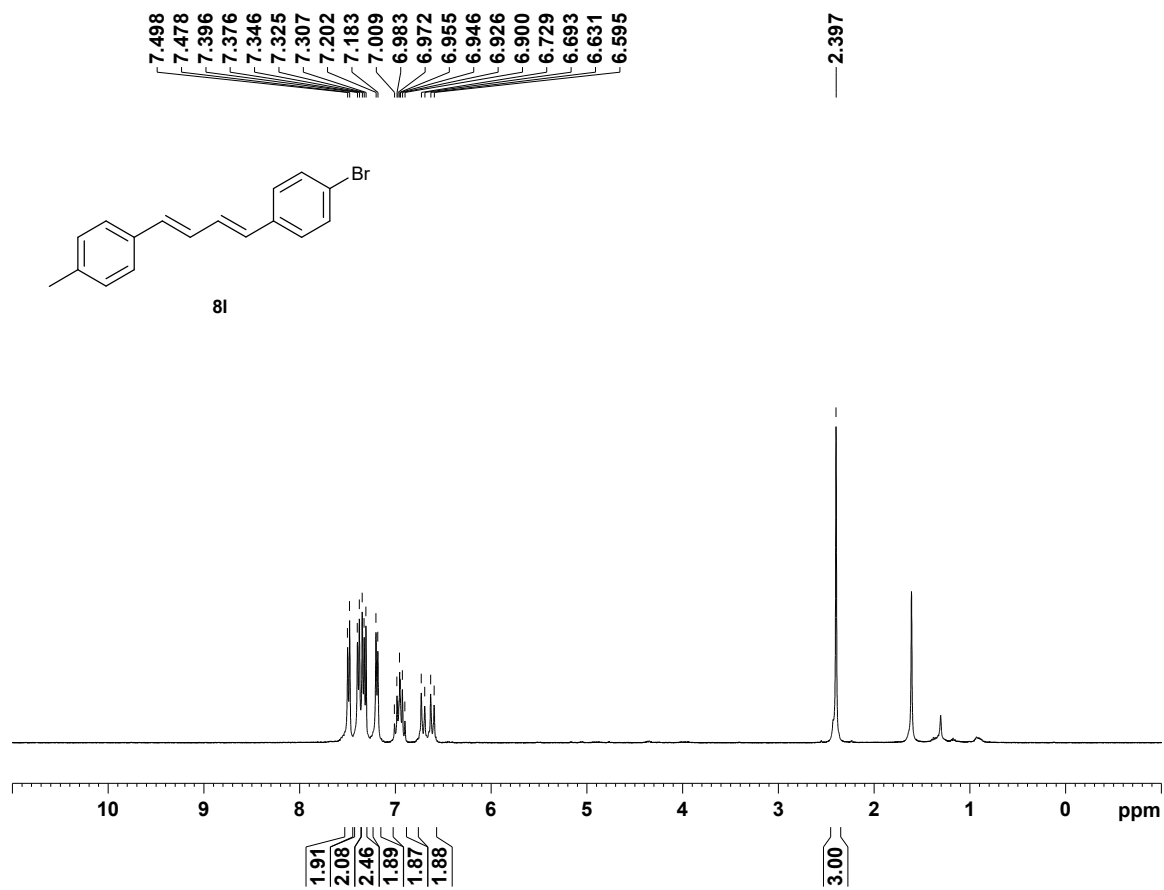

**Figure S79.** <sup>1</sup>H NMR (400 MHz, CDCl<sub>3</sub>) spectrum of **8I**



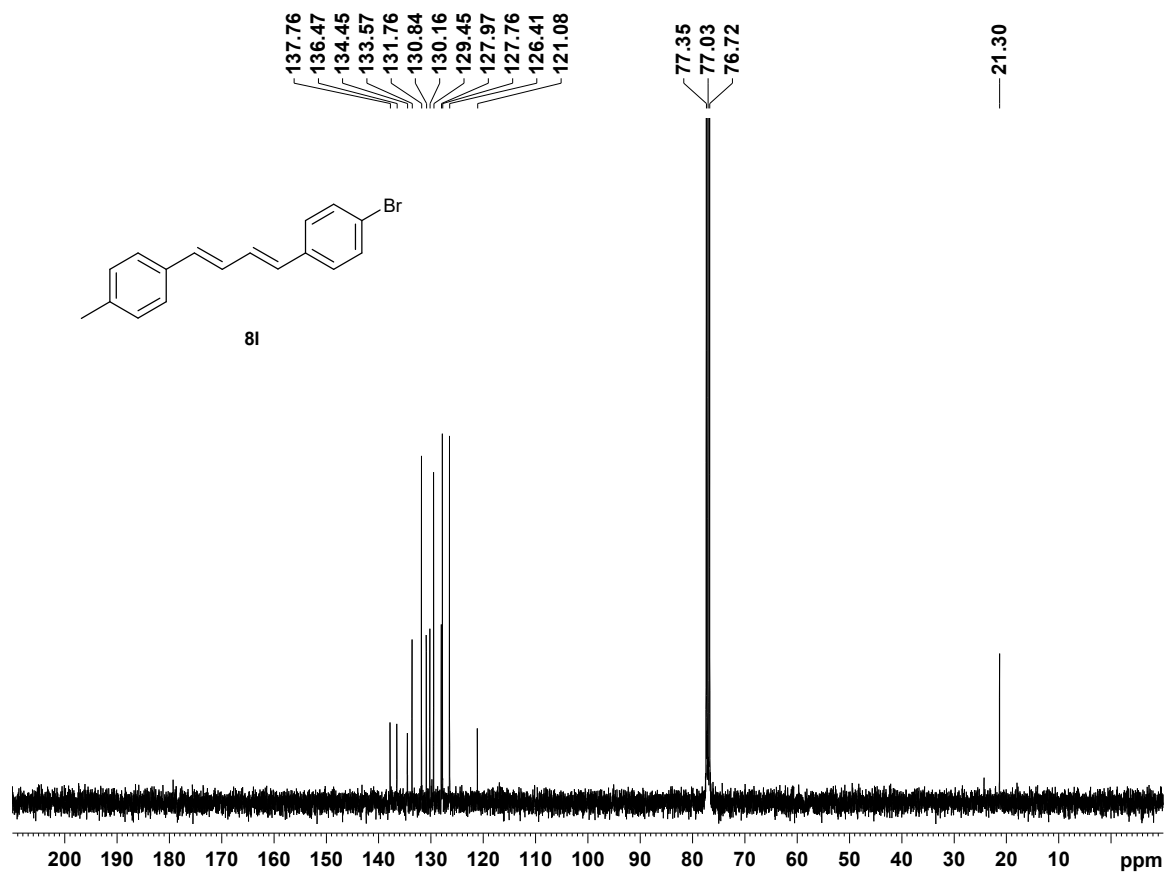

Figure S80.  $^{13}\text{C}\{^1\text{H}\}$  NMR (100 MHz,  $\text{CDCl}_3$ ) spectrum of **81**

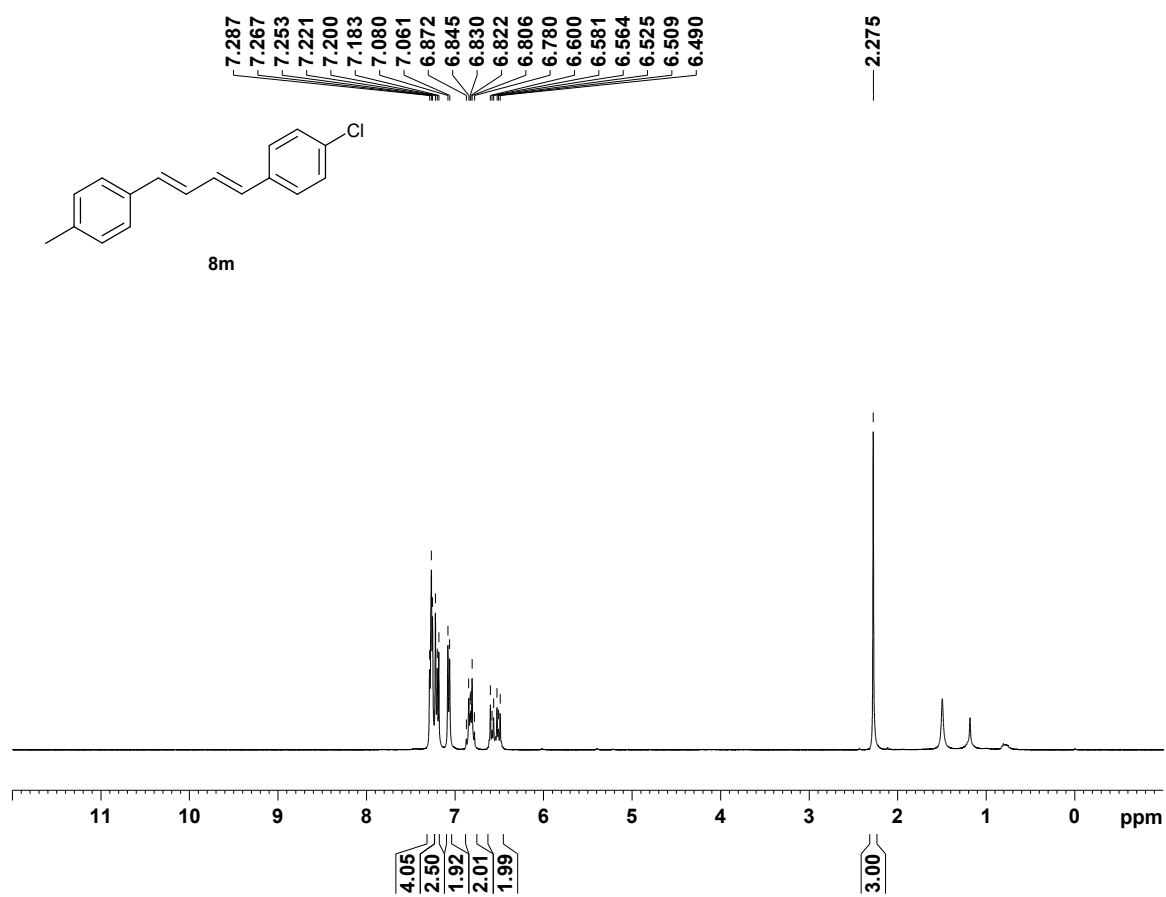

Figure S81. <sup>1</sup>H NMR (400 MHz, CDCl<sub>3</sub>) spectrum of **8m**

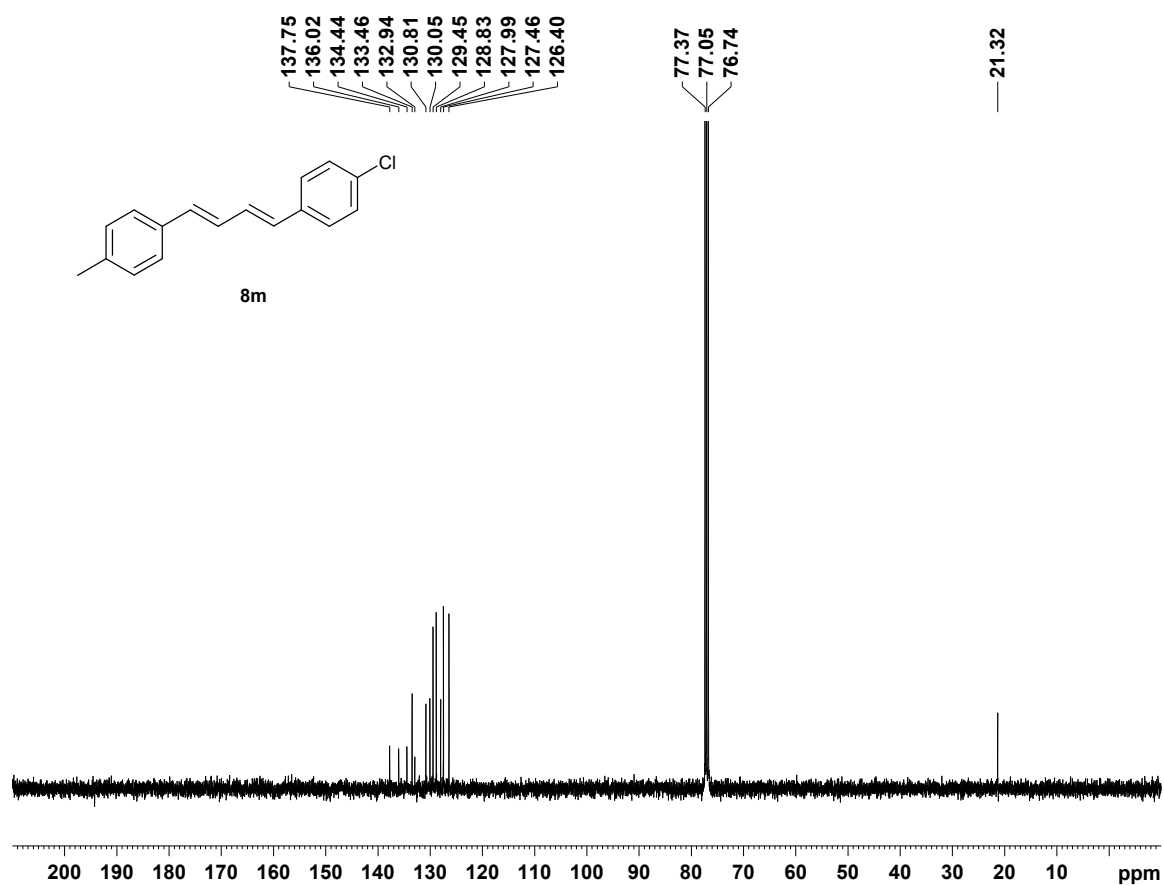

Figure S82.  $^{13}\text{C}\{^1\text{H}\}$  NMR (100 MHz,  $\text{CDCl}_3$ ) spectrum of **8m**

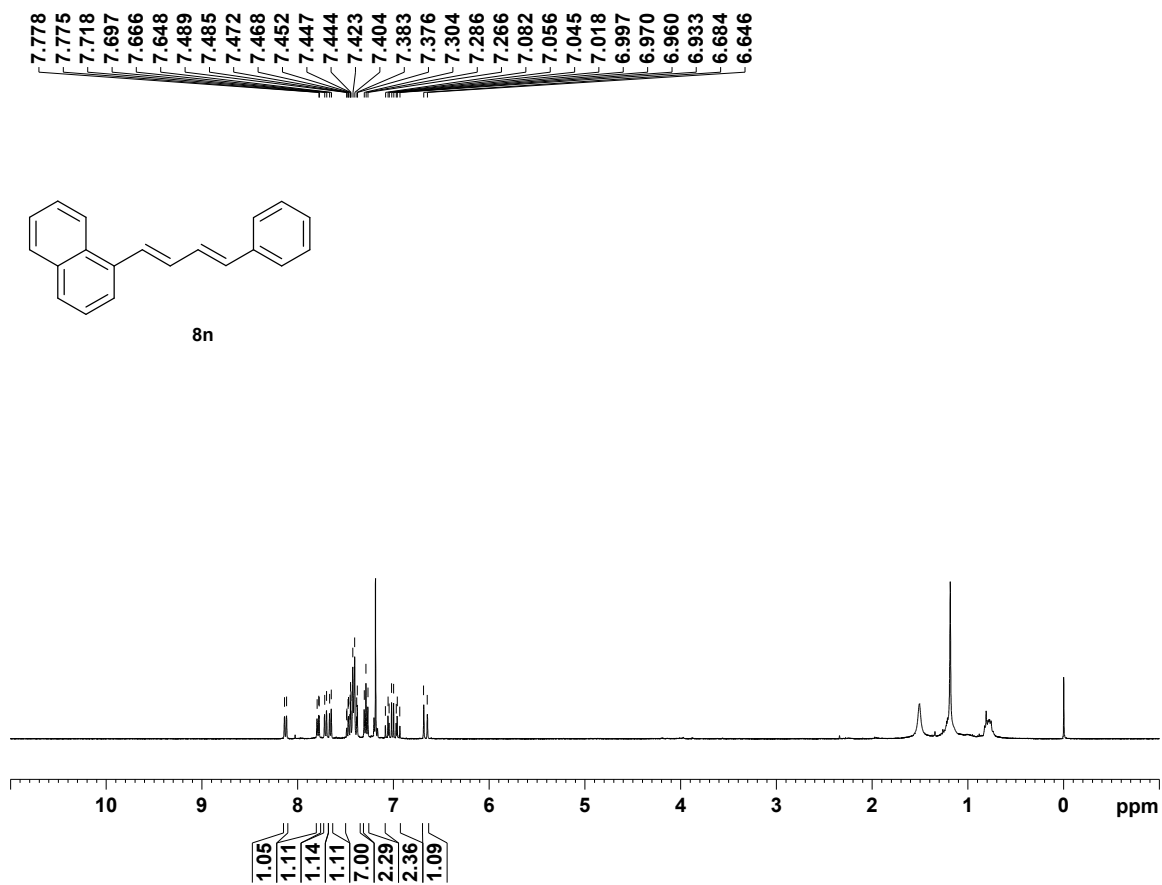

Figure S83. <sup>1</sup>H NMR (400 MHz, CDCl<sub>3</sub>) spectrum of **8n**

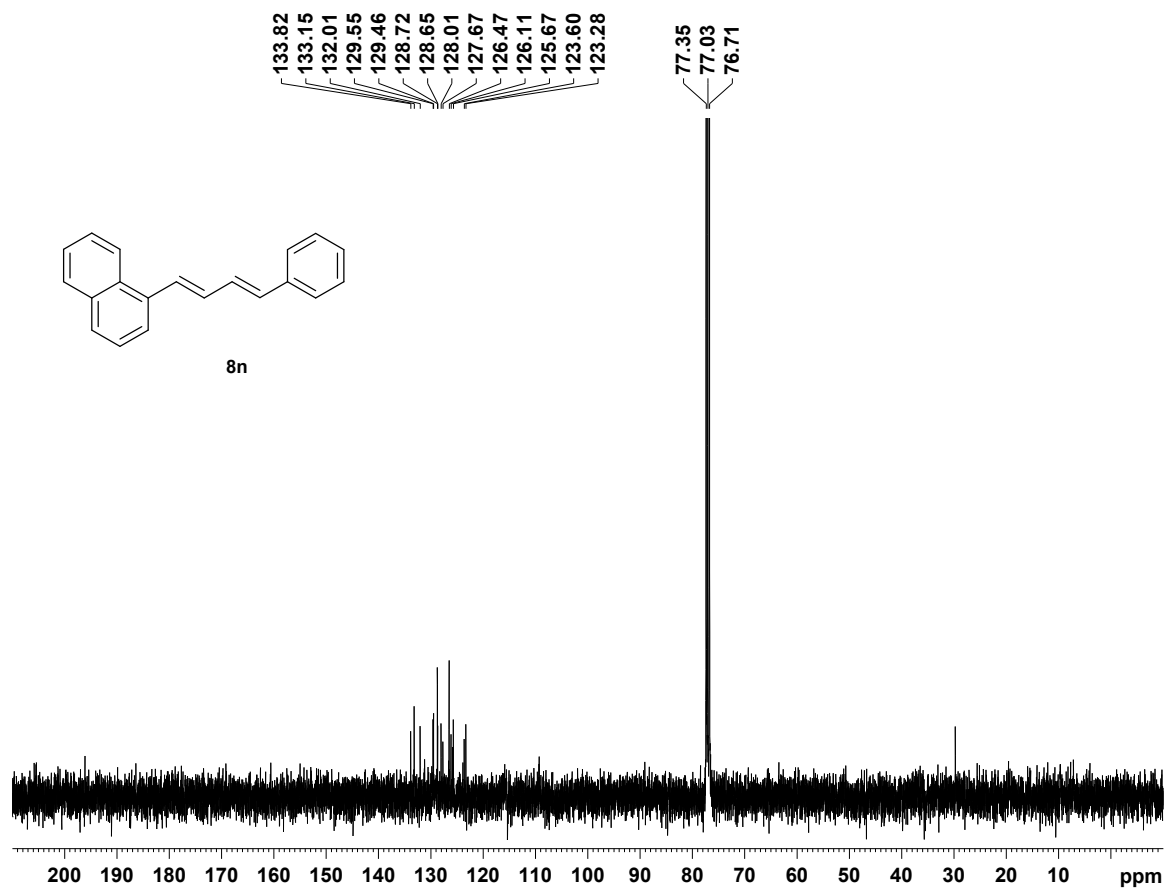

**Figure S84.**  $^{13}\text{C}\{^1\text{H}\}$  NMR (100 MHz,  $\text{CDCl}_3$ ) spectrum of **8n**

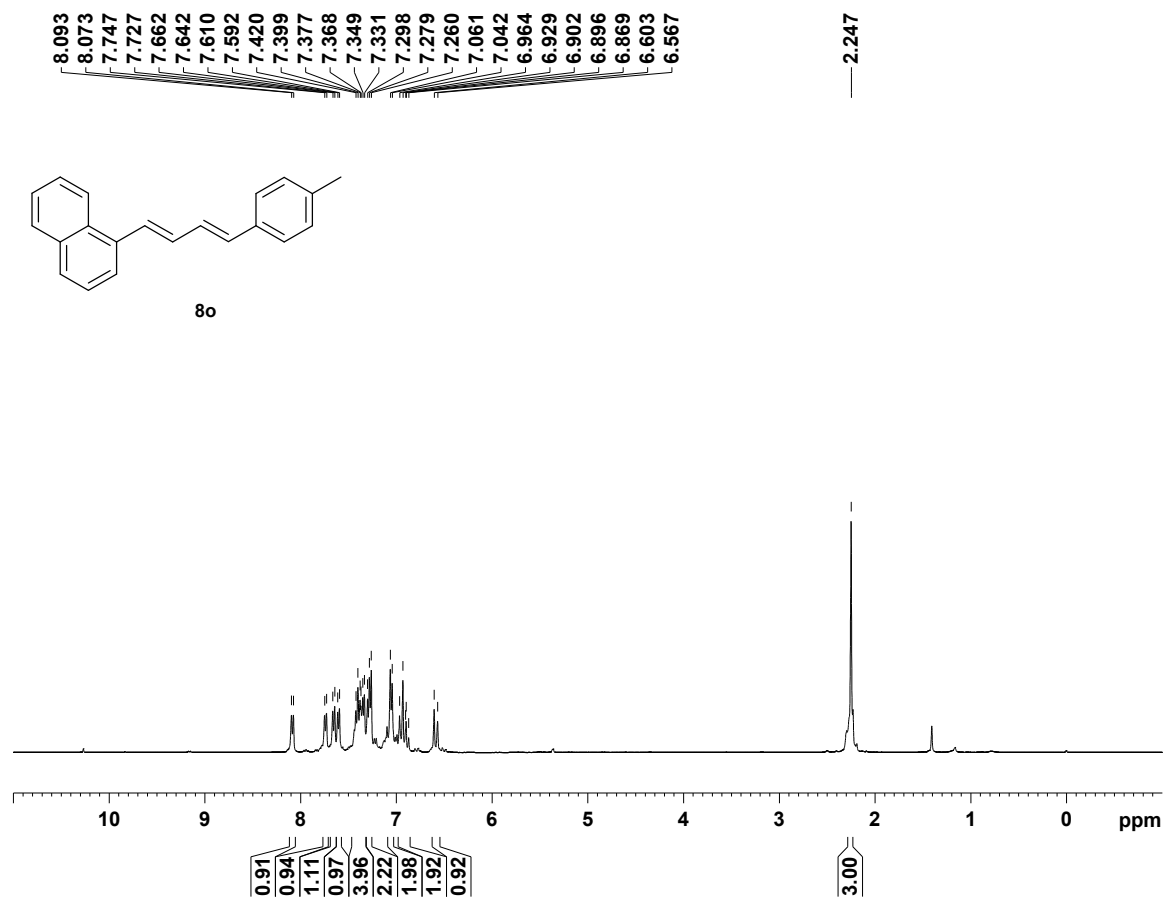

Figure S85. <sup>1</sup>H NMR (400 MHz, CDCl<sub>3</sub>) spectrum of **8o**

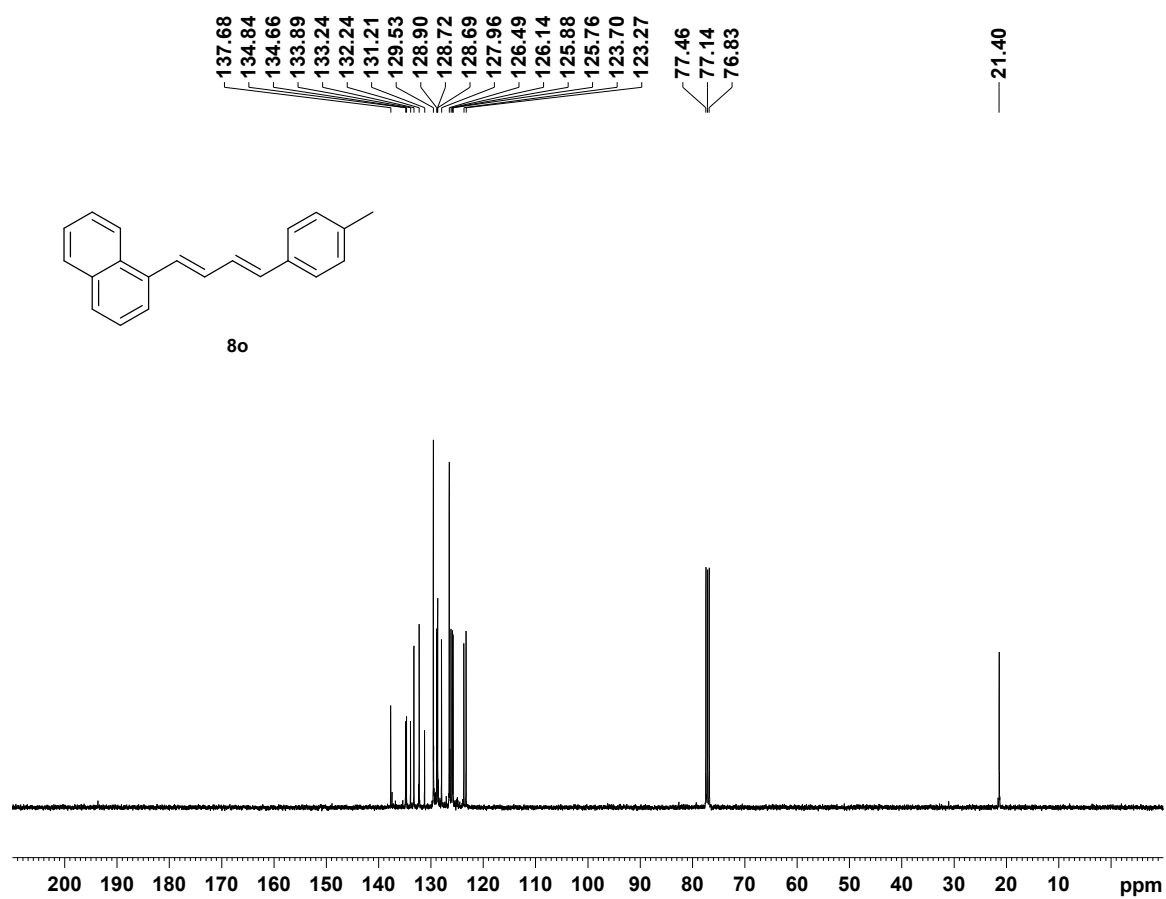

Figure S86.  $^{13}\text{C}\{^1\text{H}\}$  NMR (100 MHz,  $\text{CDCl}_3$ ) spectrum of **8o**

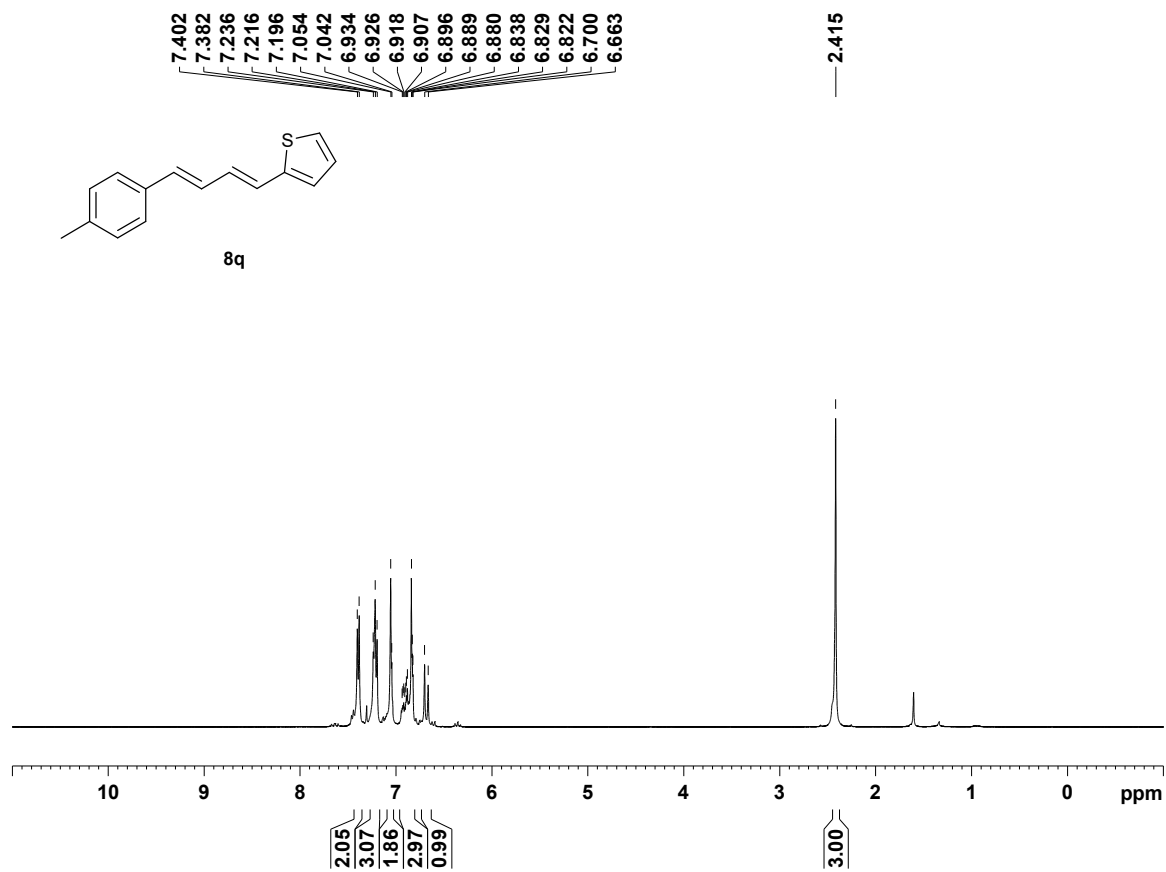

Figure S87. <sup>1</sup>H NMR (400 MHz, CDCl<sub>3</sub>) spectrum of **8q**



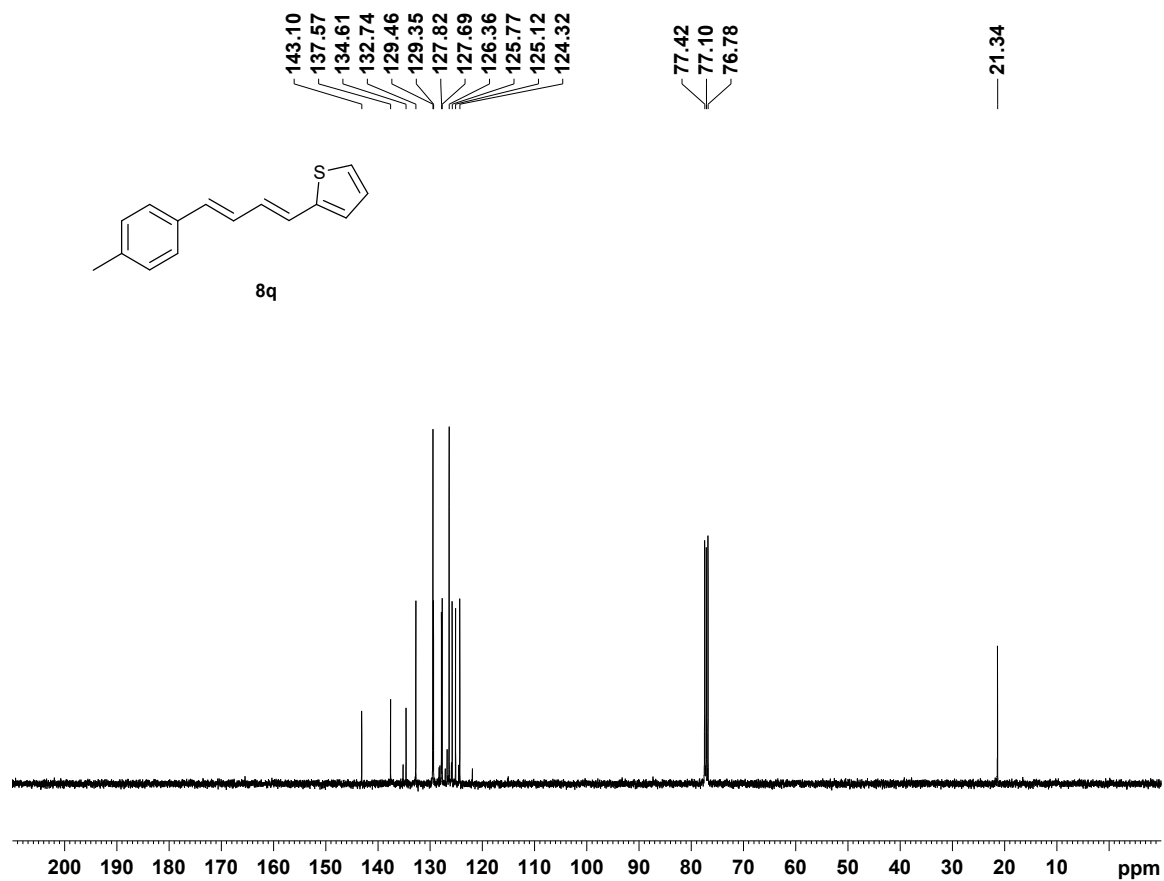

**Figure S88.**  $^{13}\text{C}\{^1\text{H}\}$  NMR (100 MHz,  $\text{CDCl}_3$ ) spectrum of **8q**

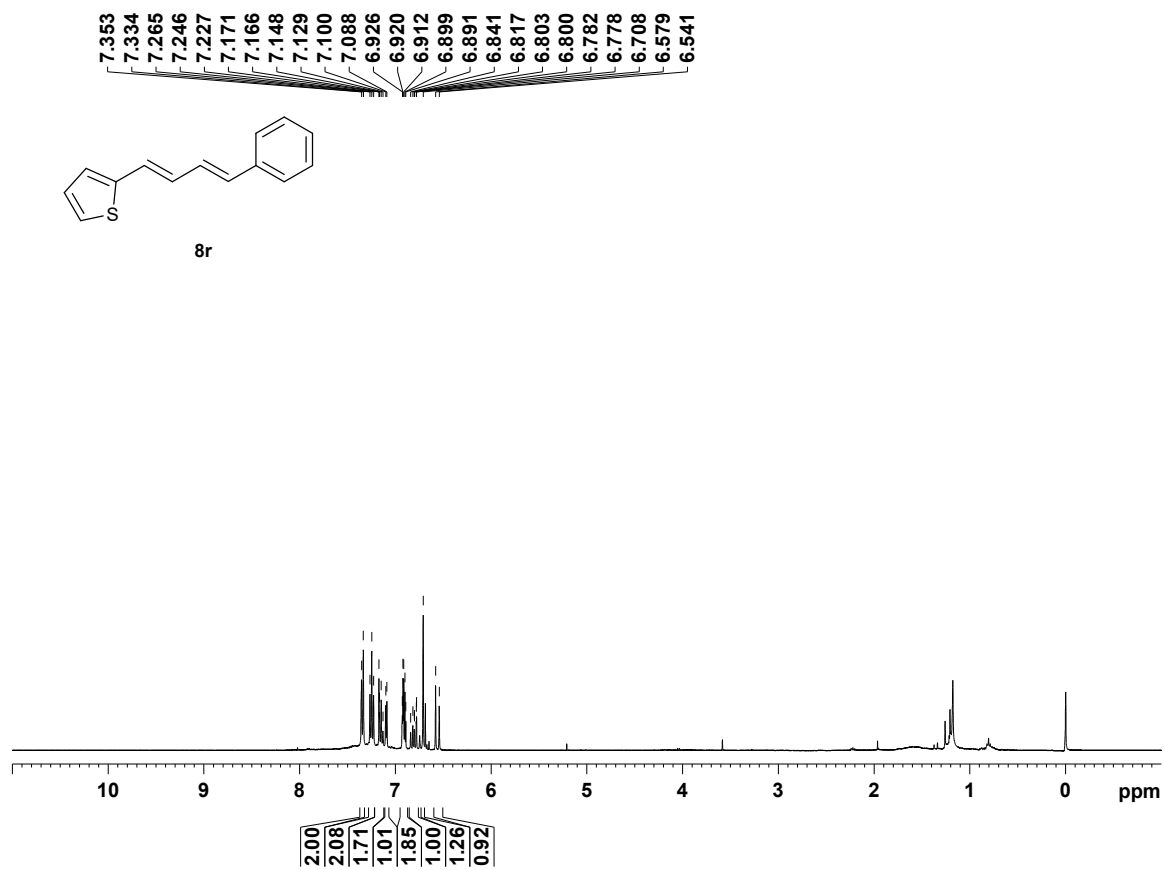

**Figure S89.** <sup>1</sup>H NMR (400 MHz, CDCl<sub>3</sub>) spectrum of **8r**

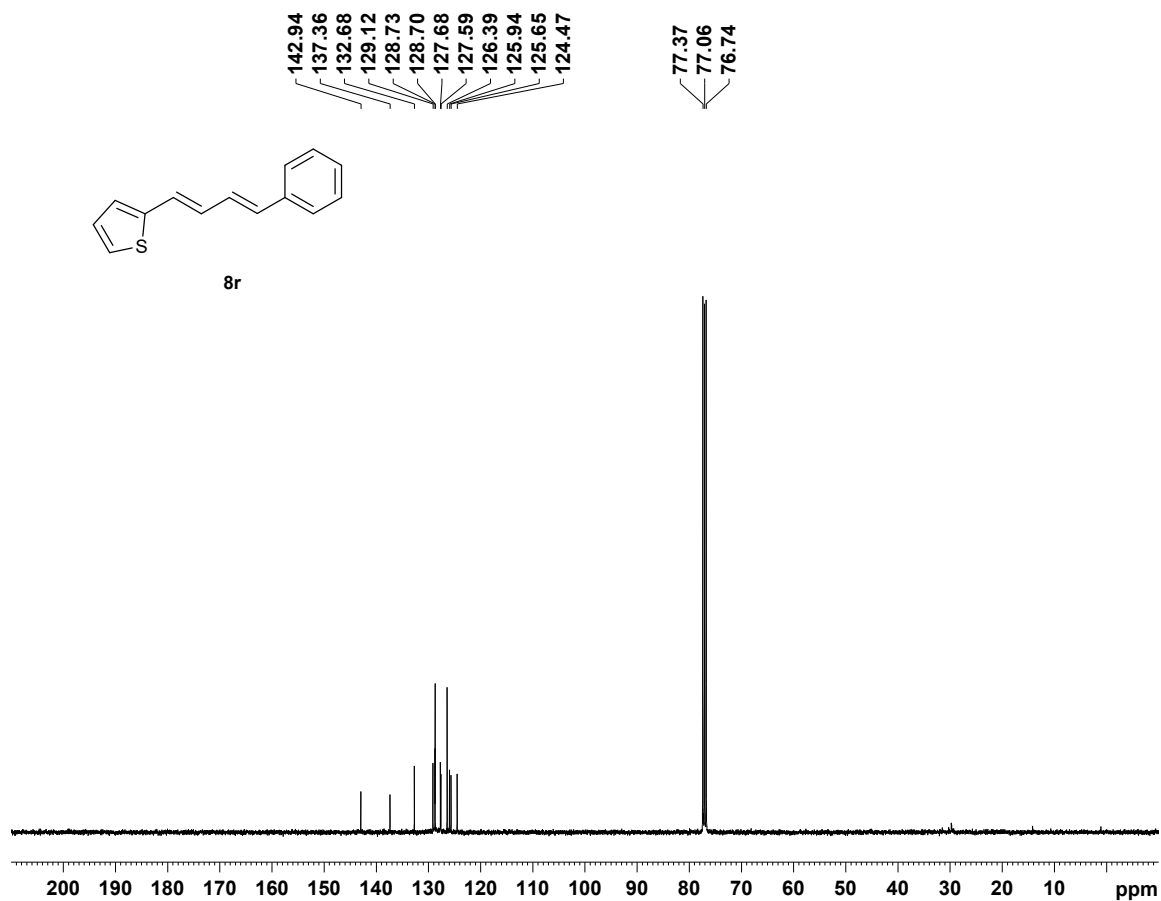

**Figure S90.**  $^{13}\text{C}\{^1\text{H}\}$  NMR (100 MHz,  $\text{CDCl}_3$ ) spectrum of **8r**

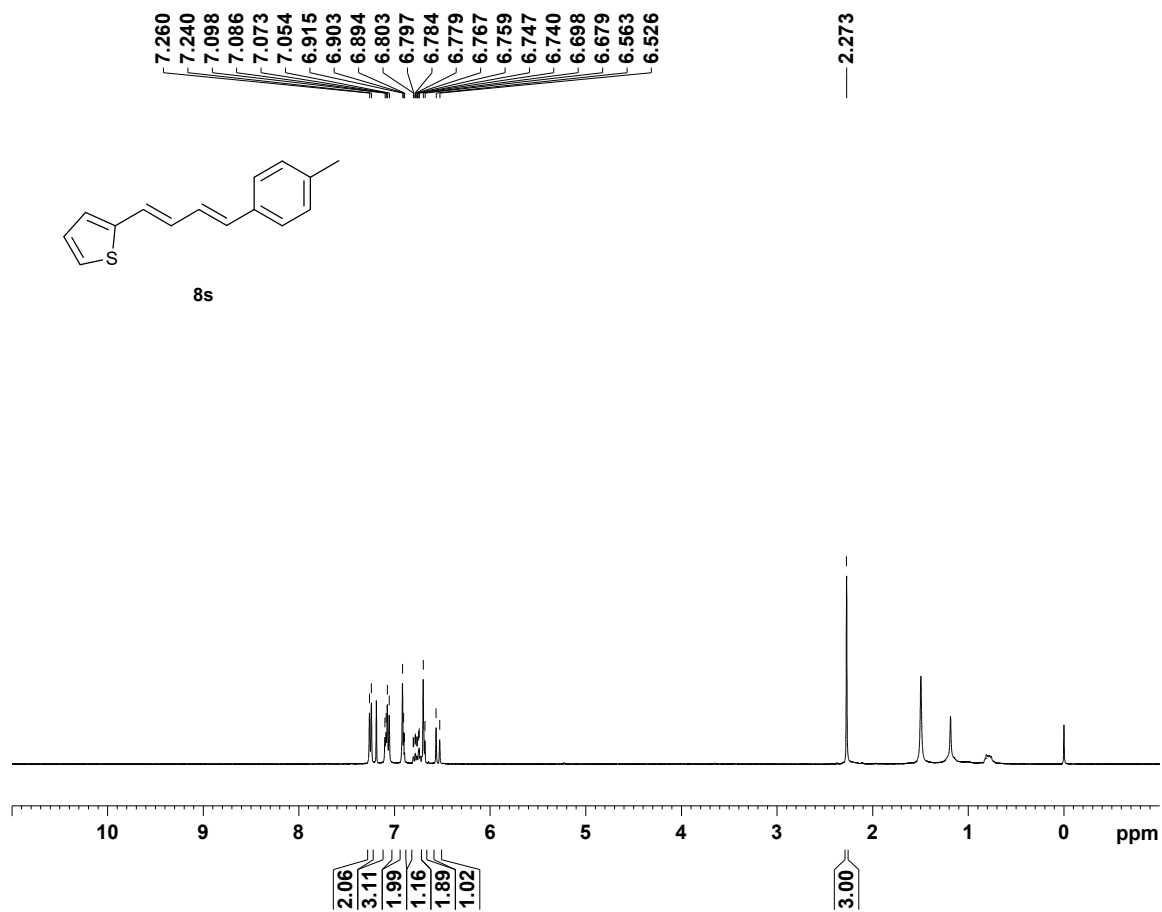

**Figure S91.** <sup>1</sup>H NMR (400 MHz, CDCl<sub>3</sub>) spectrum of **8s**

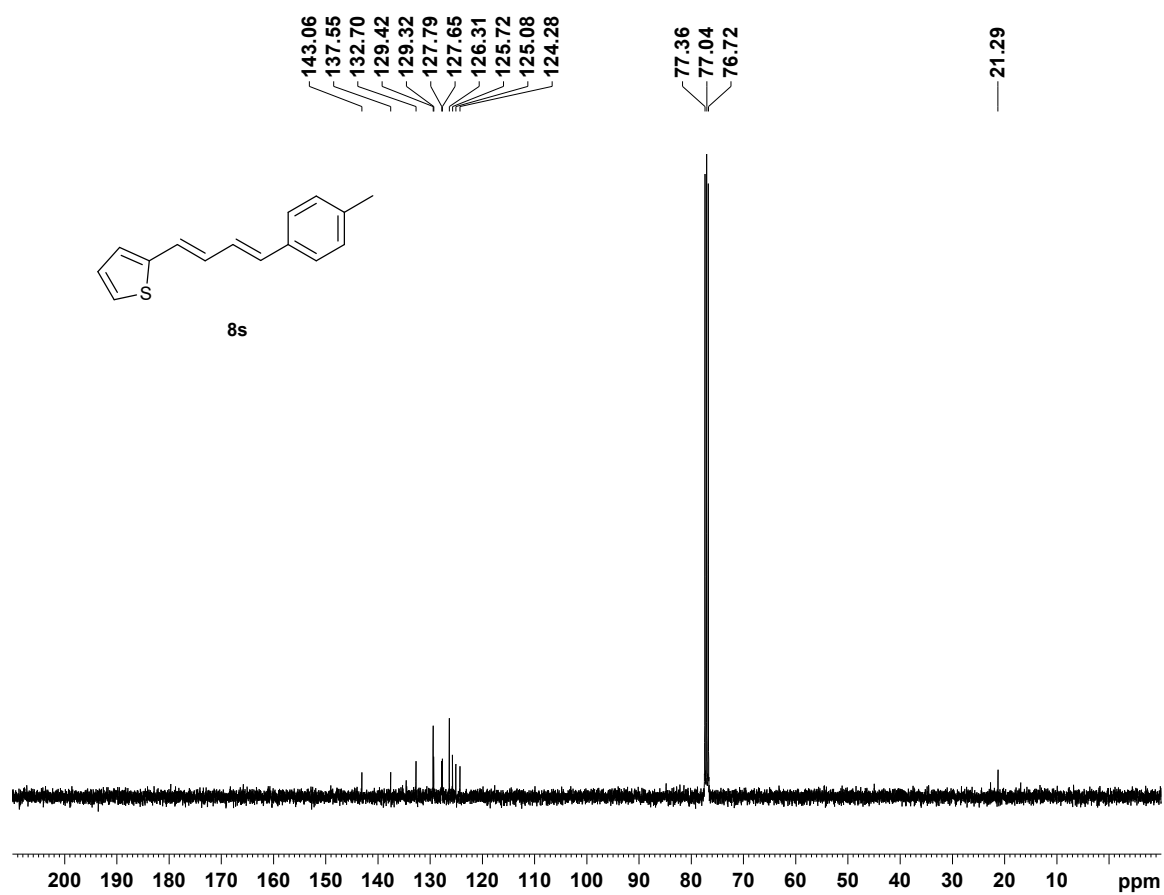

**Figure S92.**  $^{13}\text{C}\{^1\text{H}\}$  NMR (100 MHz,  $\text{CDCl}_3$ ) spectrum of **8s**

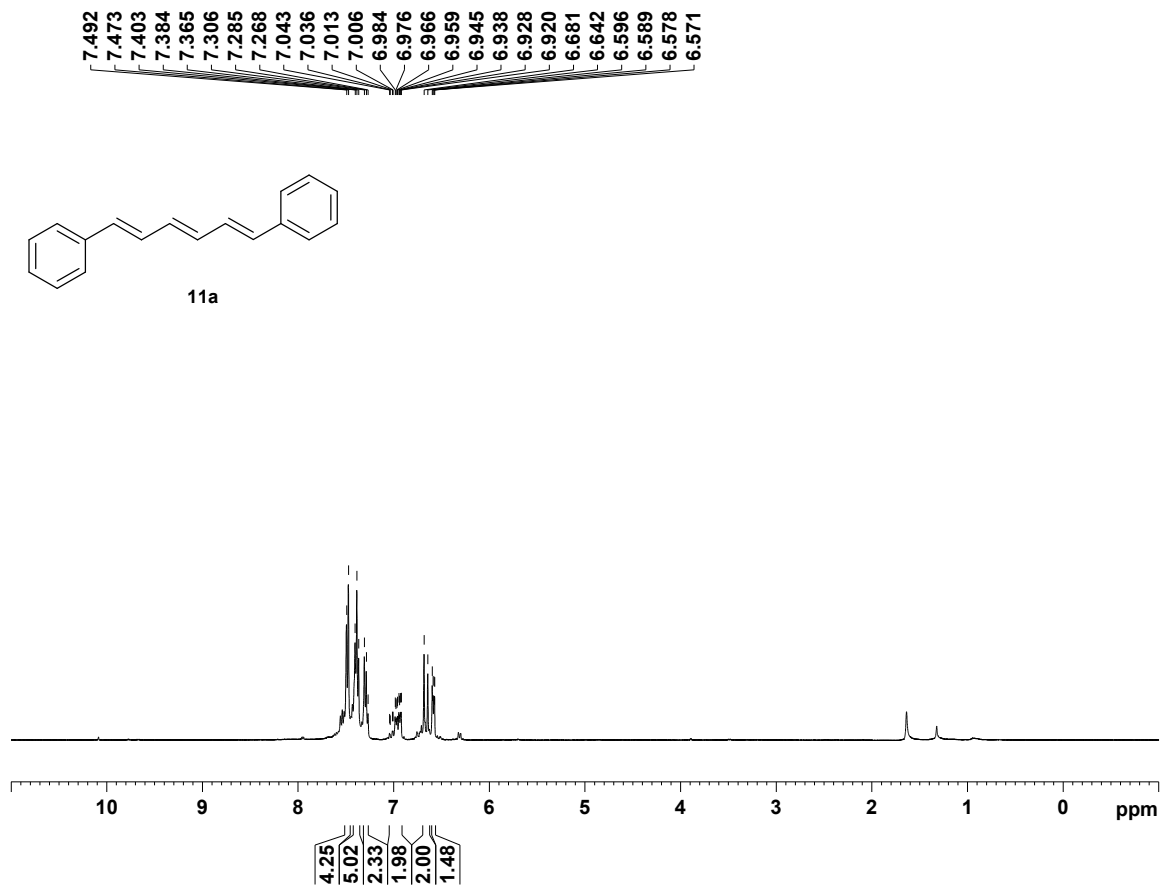

Figure S93. <sup>1</sup>H NMR (400 MHz, CDCl<sub>3</sub>) spectrum of 11a

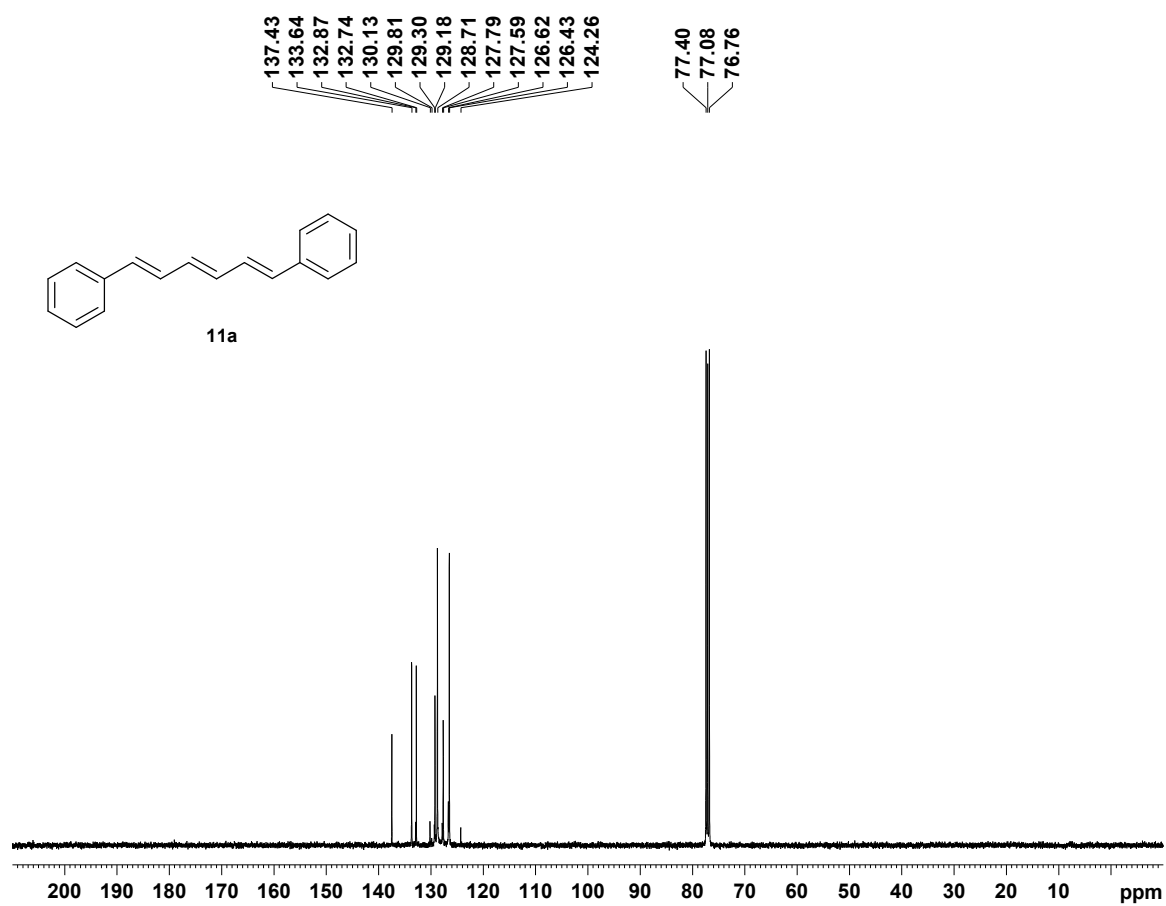

Figure S94.  $^{13}\text{C}\{^1\text{H}\}$  NMR (100 MHz,  $\text{CDCl}_3$ ) spectrum of 11a

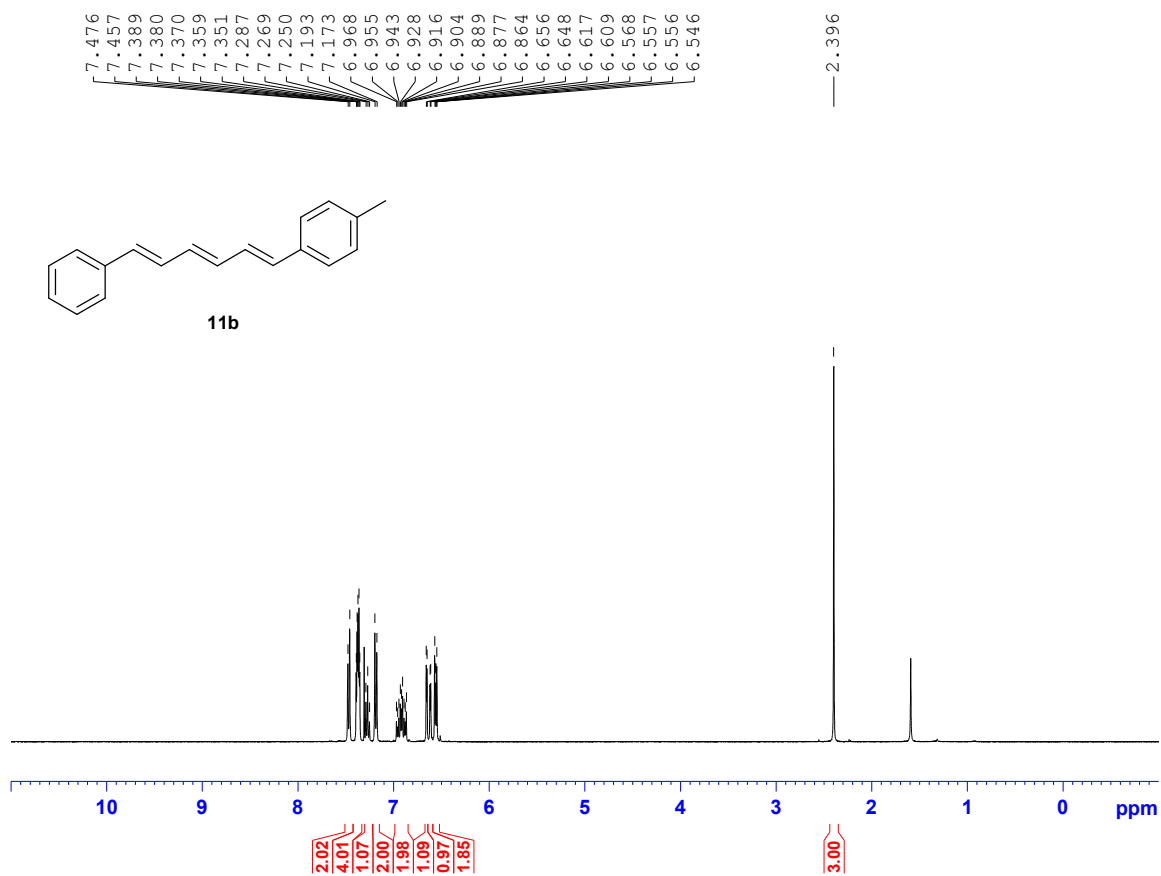

**Figure S95.** <sup>1</sup>H NMR (400 MHz, CDCl<sub>3</sub>) spectrum of **11b**



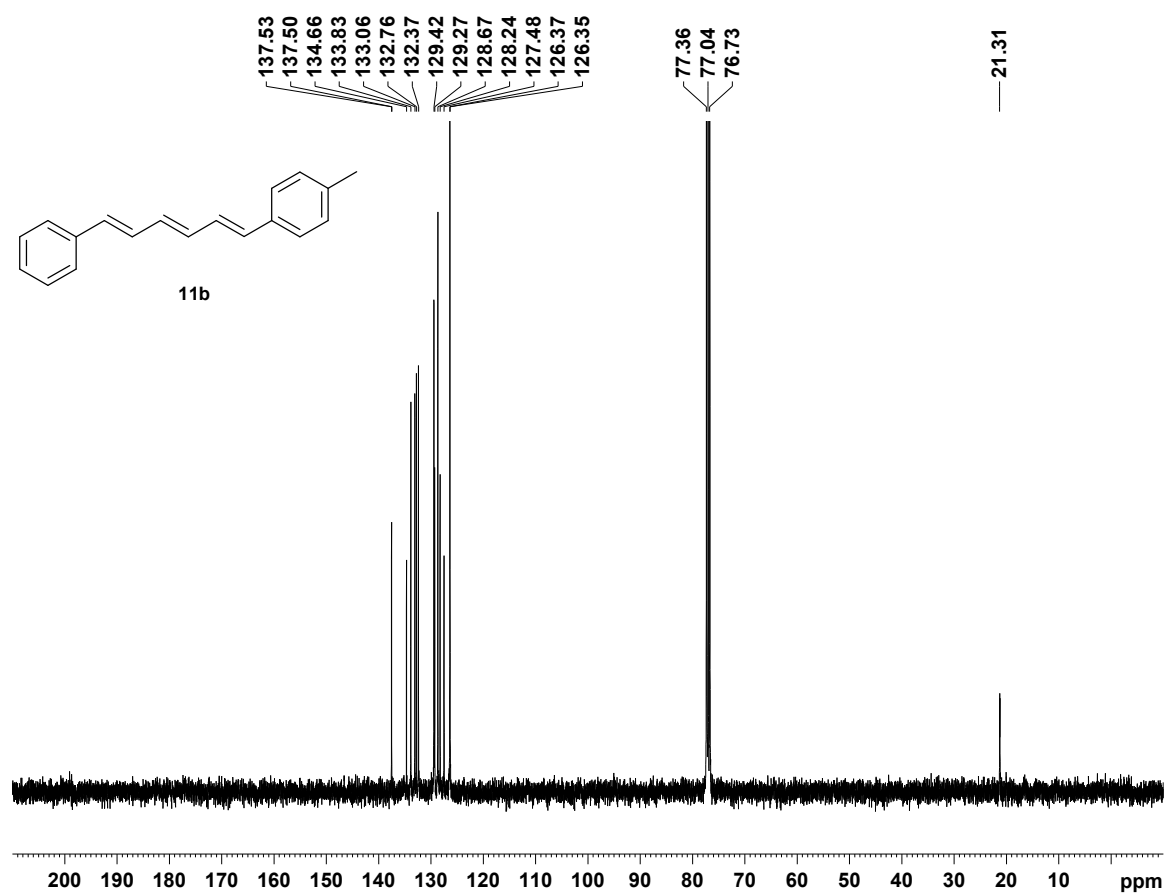

**Figure S96.**  $^{13}\text{C}\{^1\text{H}\}$  NMR (100 MHz,  $\text{CDCl}_3$ ) spectrum of **11b**

## X-Ray structure of 8h

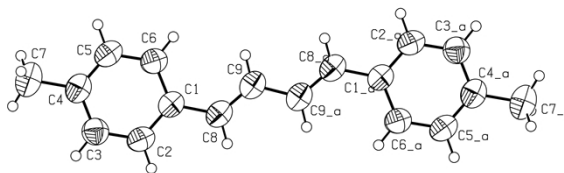

**Figure S97.** ORTEP plot of the crystal structure of **8h** (at 30% probability level)

**Crystal structure determination:** Single crystals suitable for X-ray studies were grown by recrystallization of **8h** from hexane/DCM (9:1). X-ray data were collected on a CCD diffractometer using graphite-monochromated Mo-K $\alpha$  radiation.

**Table 1.** Selected crystal parameters and refinement metrics for **8h**

|                                   |                                 |
|-----------------------------------|---------------------------------|
| CCDC Number for <b>8h</b>         | 2338084                         |
| Chemical formula                  | C <sub>18</sub> H <sub>18</sub> |
| Formula weight                    | 234.14                          |
| Crystal system                    | Monoclinic                      |
| Space group                       | P 2 <sub>1</sub> /c             |
| a (Å)                             | 12.3661(6) Å                    |
| b (Å)                             | 7.7969(4) Å                     |
| c (Å)                             | 7.2005(3) Å                     |
| $\alpha$ (°)                      | 90 deg                          |
| $\beta$ (°)                       | 92.930(4) deg                   |
| $\gamma$ (°)                      | 90 deg                          |
| Volume (Å <sup>3</sup> )          | 693.35(6)                       |
| Z                                 | 2                               |
| R, wR2                            | 0.0539, 0.1719                  |
| Goodness-of-fit on F <sup>2</sup> | 1.122                           |
